# Supplementary material for: Pyridine and phosphonate containing ligands for stable lanthanide complexation. An experimental and theoretical study to assess the solution structure
Source: Royal Society of Chemistry journal article supplement (doi:10.1039/b611544f), 2006-01-01
Supplement: b611544f.pdf [file b611544f.pdf]

**Supporting Information for:**

Pyridine and phosphonate containing ligands for  
stable lanthanide complexation. An experimental  
and theoretical study to assess the solution  
structure

*Marta Mato-Iglesias,<sup>a</sup> Edina Balogh,<sup>b</sup> Carlos Platas-Iglesias,<sup>\*a</sup> Éva Tóth<sup>b,c</sup> Andrés de Blas<sup>\*a</sup>  
and Teresa Rodríguez-Blas<sup>a</sup>*

**Table S1.** Distances (Å) between the Ln<sup>III</sup> ion and oxygen (Ln···O<sub>w2nd</sub>) and hydrogen (Ln···H<sub>w2nd</sub>) atoms of second sphere water molecules hydrogen bonded to the highly charged phosphonate groups obtained from ab initio calculations at the HF/3-21G\* level on [Gd(L)(H<sub>2</sub>O)]<sup>3-</sup>·19H<sub>2</sub>O and [Lu(L)]<sup>3-</sup>·20H<sub>2</sub>O molecular clusters (L = L<sup>2</sup>, L<sup>3</sup>).

| <i>tw</i> -[Gd(L <sup>2</sup> )(H <sub>2</sub> O)] <sup>3-</sup> | (1) <sup>a</sup>       |                        | (2) <sup>a</sup>       |                        |
|------------------------------------------------------------------|------------------------|------------------------|------------------------|------------------------|
|                                                                  | Ln···O <sub>w2nd</sub> | Ln···H <sub>w2nd</sub> | Ln···O <sub>w2nd</sub> | Ln···H <sub>w2nd</sub> |
|                                                                  | 4.12                   | 3.25/4.79              | 4.09                   | 3.33/4.51              |
|                                                                  | 4.23                   | 4.18/4.36              | 5.47                   | 4.99/5.28              |
|                                                                  | 5.68                   | 4.98/6.48              | 5.52                   | 4.80/6.05              |
|                                                                  | 6.00                   | 5.51/5.56              | 5.95                   | 5.15/6.01              |
|                                                                  | 6.68                   | 6.00/6.28              | 6.03                   | 5.45/5.65              |
|                                                                  | 7.21                   | 6.40/7.17              | 6.32                   | 5.39/6.78              |
|                                                                  |                        |                        | 7.01                   | 6.35/6.81              |
| <i>tw</i> -[Gd(L <sup>3</sup> )(H <sub>2</sub> O)] <sup>3-</sup> | 4.12                   | 3.25/4.79              | 4.00                   | 3.28/4.42              |
|                                                                  | 4.20                   | 4.16/4.33              | 5.42                   | 5.24/5.92              |
|                                                                  | 5.69                   | 4.98/6.48              | 5.73                   | 5.01/6.24              |
|                                                                  | 5.96                   | 5.53/5.48              | 5.97                   | 5.19/6.02              |
|                                                                  | 6.66                   | 6.26/5.98              | 6.06                   | 5.47/5.70              |
|                                                                  | 7.21                   | 6.41/7.16              | 6.42                   | 5.49/6.87              |
|                                                                  |                        |                        | 7.04                   | 6.36/6.85              |
| <i>tw</i> -[Lu(L <sup>2</sup> )] <sup>3-</sup>                   | 4.03                   | 3.14/4.58              | 3.91                   | 3.18/4.31              |
|                                                                  | 4.66                   | 4.42/4.57              | 5.30                   | 4.93/5.29              |
|                                                                  | 5.37                   | 4.65/4.17              | 5.61                   | 4.88/6.11              |
|                                                                  | 6.11                   | 5.64/5.65              | 5.85                   | 5.07/5.88              |
|                                                                  | 6.59                   | 5.95/6.15              | 5.92                   | 5.35/5.53              |
|                                                                  | 6.92                   | 6.10/6.94              | 6.33                   | 5.39/5.76              |
|                                                                  |                        |                        | 6.91                   | 6.25/6.71              |
| <i>tw</i> -[Lu(L <sup>3</sup> )] <sup>3-</sup>                   | 4.03                   | 3.13/4.58              | 3.85                   | 3.16/4.26              |
|                                                                  | 4.64                   | 4.42/4.56              | 5.09                   | 4.61/5.01              |
|                                                                  | 5.36                   | 4.64/6.15              | 5.79                   | 5.05/6.24              |
|                                                                  | 6.07                   | 5.62/5.60              | 5.87                   | 5.11/5.91              |
|                                                                  | 6.57                   | 5.93/6.13              | 5.95                   | 5.38/5.58              |
|                                                                  | 6.91                   | 6.10/6.93              | 6.33                   | 5.39/6.76              |
|                                                                  |                        |                        | 6.90                   | 6.23/6.71              |
| <i>tf</i> -[Gd(L <sup>2</sup> )(H <sub>2</sub> O)] <sup>3-</sup> | 4.35                   | 3.44/4.97              | 5.62                   | 4.96/6.08              |
|                                                                  | 4.84                   | 4.06/4.79              | 5.77                   | 5.42/5.63              |
|                                                                  | 5.06                   | 4.85/4.83              | 6.24                   | 5.37/6.78              |
|                                                                  | 5.89                   | 5.17/6.70              | 6.36                   | 5.50/6.46              |
|                                                                  | 6.77                   | 6.07/6.41              | 6.58                   | 5.85/6.40              |
|                                                                  | 7.29                   | 6.45/7.25              | 7.12                   | 6.45/7.04              |
| <i>tf</i> -[Gd(L <sup>3</sup> )(H <sub>2</sub> O)] <sup>3-</sup> | 4.36                   | 3.45/4.98              | 5.69                   | 5.01/6.15              |
|                                                                  | 4.85                   | 4.09/4.79              | 5.75                   | 5.60/5.41              |
|                                                                  | 5.06                   | 4.84/4.83              | 6.25                   | 5.38/6.77              |
|                                                                  | 5.90                   | 5.18/5.70              | 6.38                   | 6.47/5.52              |
|                                                                  | 6.75                   | 6.04/6.39              | 6.60                   | 5.86/6.43              |
|                                                                  | 7.30                   | 6.46/7.25              | 7.11                   | 6.43/7.04              |

<sup>a</sup> Distances corresponding to water molecules hydrogen bonded to phosphonate group (1) and (2) are listed separately.

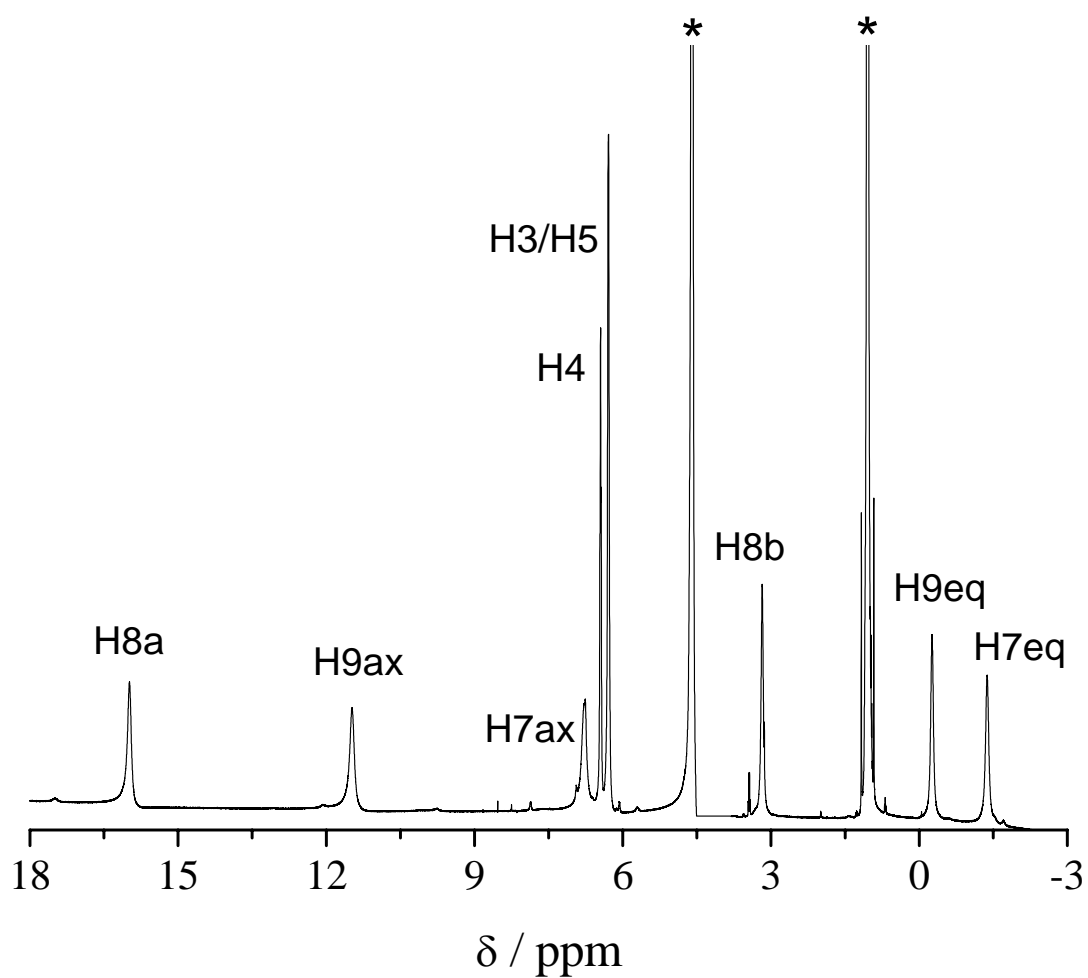

**Figure S1.**  $^1\text{H}$  NMR spectra of the  $\text{Eu}^{\text{III}}$  complex of  $\text{L}^2$  recorded in  $\text{D}_2\text{O}$  solution (30 mM,  $\text{pD} = 8.0$ ). HOD and  $t\text{BuOH}$  signals are denoted with an asterisk.

| Center<br>Number | Atomic<br>Number | Coordinates (Angstroms) |           |           |
|------------------|------------------|-------------------------|-----------|-----------|
|                  |                  | x                       | y         | z         |
| 1                | 57               | -0.215165               | -0.150896 | 0.471999  |
| 2                | 7                | -0.529649               | 2.566258  | 0.201002  |
| 3                | 7                | 0.424785                | -2.866013 | -0.148587 |
| 4                | 7                | -1.275609               | -1.532588 | -2.026936 |
| 5                | 7                | 0.327282                | 1.120072  | -2.131508 |
| 6                | 8                | -2.528649               | 0.235030  | -0.058139 |
| 7                | 8                | 2.060189                | 0.710004  | 0.253989  |
| 8                | 15               | -3.582632               | -0.428216 | -0.962730 |
| 9                | 15               | 2.817378                | 0.696557  | -1.077436 |
| 10               | 8                | -3.993155               | 0.526796  | -2.066450 |
| 11               | 8                | -4.742584               | -0.999951 | -0.157442 |
| 12               | 8                | 4.161647                | 1.404645  | -1.002188 |
| 13               | 8                | 2.923100                | -0.716425 | -1.647878 |
| 14               | 6                | -0.501684               | 5.292815  | 0.043356  |
| 15               | 6                | 0.230610                | -4.896174 | -1.344421 |
| 16               | 6                | 0.023934                | -3.523498 | -1.232025 |
| 17               | 6                | -0.550610               | -2.764706 | -2.397143 |
| 18               | 6                | -1.231611               | -0.579344 | -3.172878 |
| 19               | 6                | -2.685880               | -1.859403 | -1.646215 |
| 20               | 6                | 1.325543                | -4.865447 | 0.767830  |
| 21               | 6                | 1.069404                | -3.517680 | 0.822105  |
| 22               | 6                | 1.520184                | -2.727495 | 2.022377  |
| 23               | 6                | 0.887043                | -5.570900 | -0.339639 |
| 24               | 6                | -0.522645               | 4.671258  | 1.273795  |
| 25               | 6                | -0.514749               | 3.295732  | 1.305337  |
| 26               | 6                | -0.419778               | 2.564290  | 2.612213  |
| 27               | 6                | -0.498023               | 4.525997  | -1.107427 |
| 28               | 6                | -0.538818               | 3.149166  | -0.993905 |
| 29               | 6                | -0.637520               | 2.247158  | -2.198899 |
| 30               | 6                | 0.098561                | 0.164106  | -3.251746 |
| 31               | 6                | 1.749562                | 1.632862  | -2.203753 |
| 32               | 1                | -0.457679               | 6.361669  | -0.027124 |
| 33               | 1                | -0.110269               | -5.405877 | -2.221450 |
| 34               | 1                | 0.298208                | -2.526749 | -3.026455 |
| 35               | 1                | -1.205012               | -3.424435 | -2.965418 |
| 36               | 1                | -1.365644               | -1.128777 | -4.106252 |
| 37               | 1                | -2.070387               | 0.087131  | -3.083708 |
| 38               | 1                | -2.662404               | -2.626887 | -0.886958 |
| 39               | 1                | -3.219774               | -2.281197 | -2.498025 |
| 40               | 1                | 1.849079                | -5.317173 | 1.580573  |
| 41               | 1                | 1.059489                | -6.625981 | -0.418139 |
| 42               | 1                | -0.503156               | 5.202727  | 2.199137  |
| 43               | 1                | -0.397223               | 4.978335  | -2.068726 |
| 44               | 1                | -1.641116               | 1.846945  | -2.218831 |
| 45               | 1                | -0.474968               | 2.829573  | -3.103752 |

|    |   |           |           |           |
|----|---|-----------|-----------|-----------|
| 46 | 1 | 0.130207  | 0.709321  | -4.197329 |
| 47 | 1 | 0.917022  | -0.534119 | -3.255474 |
| 48 | 1 | 1.763655  | 2.681071  | -1.943354 |
| 49 | 1 | 2.115018  | 1.547933  | -3.224721 |
| 50 | 8 | 1.226449  | -1.498415 | 2.024450  |
| 51 | 8 | 2.131289  | -3.338124 | 2.920061  |
| 52 | 8 | -0.367787 | 1.279621  | 2.516261  |
| 53 | 8 | -0.350989 | 3.216960  | 3.657218  |
| 54 | 8 | 3.813730  | -0.255111 | -4.255955 |
| 55 | 1 | 3.407809  | -0.355358 | -3.378841 |
| 56 | 1 | 4.759448  | -0.121338 | -4.040390 |
| 57 | 8 | 6.004076  | 0.116283  | -2.712829 |
| 58 | 1 | 5.499379  | 0.752862  | -2.164235 |
| 59 | 1 | 5.985703  | -0.720635 | -2.214096 |
| 60 | 8 | 1.055339  | -0.052279 | 4.293420  |
| 61 | 1 | 1.510694  | -0.544714 | 3.580071  |
| 62 | 8 | -0.330850 | -2.344635 | 4.448224  |
| 63 | 1 | 0.105186  | -1.477708 | 4.616643  |
| 64 | 1 | 0.378786  | -2.965460 | 4.223285  |
| 65 | 1 | 0.387193  | 0.487262  | 3.798594  |
| 66 | 8 | 2.141923  | 2.447516  | 4.681885  |
| 67 | 1 | 1.278007  | 2.879719  | 4.540966  |
| 68 | 1 | 1.955060  | 1.488048  | 4.721623  |
| 69 | 8 | 4.694355  | -2.065701 | 2.042067  |
| 70 | 1 | 4.799232  | -2.325890 | 1.110074  |
| 71 | 1 | 3.937610  | -2.513308 | 2.447303  |
| 72 | 8 | 2.483504  | 2.775495  | 1.970360  |
| 73 | 1 | 2.547965  | 2.662209  | 2.939419  |
| 74 | 1 | 2.376006  | 1.926695  | 1.495638  |
| 75 | 8 | 5.752355  | 0.205859  | 0.945001  |
| 76 | 1 | 5.160058  | 0.800440  | 0.443526  |
| 77 | 1 | 5.257324  | -0.319905 | 1.601088  |
| 78 | 8 | 3.589123  | 3.953402  | -0.124245 |
| 79 | 1 | 3.982304  | 3.125312  | -0.469294 |
| 81 | 8 | 5.308744  | -1.812629 | -0.740520 |
| 82 | 1 | 5.648584  | -1.071632 | -0.183301 |
| 83 | 1 | 4.419620  | -1.553275 | -1.068074 |
| 84 | 8 | 2.253881  | -2.465732 | -3.637116 |
| 85 | 1 | 2.473501  | -2.077515 | -2.768333 |
| 86 | 1 | 2.776482  | -1.947143 | -4.272758 |
| 87 | 8 | 2.353990  | 4.975097  | -2.188846 |
| 88 | 1 | 2.758164  | 4.681237  | -1.322825 |
| 89 | 1 | 2.918696  | 4.606218  | -2.883173 |
| 90 | 8 | -1.677286 | -1.576987 | 2.173482  |
| 91 | 8 | -4.025611 | -0.518484 | 2.443777  |
| 92 | 8 | -5.034382 | 2.717366  | -0.825247 |
| 93 | 8 | -6.891927 | 0.618128  | -0.137138 |
| 94 | 8 | -2.494190 | -3.966933 | 1.176392  |
| 95 | 8 | -4.899700 | -3.837882 | -0.285877 |
| 96 | 8 | -6.569683 | 1.493080  | -2.678340 |

|     |   |           |           |           |
|-----|---|-----------|-----------|-----------|
| 97  | 8 | -3.674332 | 2.038139  | 1.545364  |
| 98  | 1 | -3.984433 | 0.458973  | 2.372930  |
| 99  | 1 | -4.284659 | 2.521726  | 0.962685  |
| 100 | 1 | -3.119391 | 1.477387  | 0.960914  |
| 101 | 1 | -6.343047 | 1.404404  | 0.016364  |
| 102 | 1 | -6.254468 | -0.134979 | -0.125275 |
| 103 | 1 | -4.426224 | 2.049879  | -1.213243 |
| 104 | 1 | -5.759420 | 2.734627  | -1.479331 |
| 105 | 1 | -5.689212 | 1.076606  | -2.773685 |
| 106 | 1 | -6.952225 | 1.070284  | -1.879962 |
| 107 | 1 | -5.036867 | -2.874417 | -0.261070 |
| 108 | 1 | -4.141569 | -4.017532 | 0.297580  |
| 109 | 1 | -2.570617 | -1.128506 | 2.347987  |
| 110 | 1 | -1.237568 | -1.855884 | 3.013008  |
| 111 | 1 | -2.217002 | -3.096237 | 1.539010  |
| 112 | 1 | -1.758992 | -4.351727 | 0.689339  |
| 113 | 1 | -4.428962 | -0.829732 | 1.603028  |

---

HF = -3871.6986394 Hartree

Zero-point correction = 0.964849

Sum of electronic and thermal free energies = -3870.838196

| Center<br>Number | Atomic<br>Number | Coordinates (Angstroms) |           |           |
|------------------|------------------|-------------------------|-----------|-----------|
|                  |                  | x                       | y         | z         |
| 1                | 60               | -0.229668               | -0.121304 | 0.509535  |
| 2                | 7                | -0.603462               | 2.531071  | 0.189641  |
| 3                | 7                | 0.528440                | -2.780060 | -0.098640 |
| 4                | 7                | -1.198827               | -1.573416 | -2.030568 |
| 5                | 7                | 0.293617                | 1.110526  | -2.135660 |
| 6                | 8                | -2.489915               | 0.157978  | -0.071476 |
| 7                | 8                | 2.003665                | 0.652056  | 0.223909  |
| 8                | 15               | -3.524820               | -0.530821 | -0.979255 |
| 9                | 15               | 2.781827                | 0.711608  | -1.094262 |
| 10               | 8                | -3.944068               | 0.409645  | -2.093331 |
| 11               | 8                | -4.683587               | -1.120646 | -0.186219 |
| 12               | 8                | 4.102098                | 1.459542  | -0.978834 |
| 13               | 8                | 2.949725                | -0.673099 | -1.716974 |
| 14               | 6                | -0.675598               | 5.258927  | 0.024555  |
| 15               | 6                | 0.485300                | -4.831297 | -1.276327 |
| 16               | 6                | 0.190117                | -3.473363 | -1.181493 |
| 17               | 6                | -0.419077               | -2.776120 | -2.366799 |
| 18               | 6                | -1.186845               | -0.639506 | -3.188989 |
| 19               | 6                | -2.592057               | -1.945382 | -1.642405 |
| 20               | 6                | 1.536480                | -4.714176 | 0.851845  |
| 21               | 6                | 1.195363                | -3.384411 | 0.887724  |
| 22               | 6                | 1.575814                | -2.564678 | 2.091377  |
| 23               | 6                | 1.164076                | -5.455930 | -0.254945 |
| 24               | 6                | -0.676841               | 4.640191  | 1.256610  |
| 25               | 6                | -0.621044               | 3.266343  | 1.290871  |
| 26               | 6                | -0.521167               | 2.539734  | 2.597364  |
| 27               | 6                | -0.645230               | 4.488366  | -1.123087 |
| 28               | 6                | -0.635489               | 3.111211  | -1.006460 |
| 29               | 6                | -0.703900               | 2.206168  | -2.210236 |
| 30               | 6                | 0.111246                | 0.153982  | -3.260556 |
| 31               | 6                | 1.698418                | 1.661990  | -2.190404 |
| 32               | 1                | -0.670818               | 6.328270  | -0.048794 |
| 33               | 1                | 0.192601                | -5.367390 | -2.155135 |
| 34               | 1                | 0.413434                | -2.519035 | -3.009743 |
| 35               | 1                | -1.041960               | -3.484705 | -2.912839 |
| 36               | 1                | -1.289869               | -1.206717 | -4.116598 |
| 37               | 1                | -2.051570               | -0.005361 | -3.114979 |
| 38               | 1                | -2.538673               | -2.695602 | -0.868327 |
| 39               | 1                | -3.115741               | -2.401711 | -2.483024 |
| 40               | 1                | 2.071990                | -5.122671 | 1.679384  |
| 41               | 1                | 1.403711                | -6.498929 | -0.319686 |
| 42               | 1                | -0.682596               | 5.174320  | 2.180653  |
| 43               | 1                | -0.564764               | 4.941035  | -2.086208 |
| 44               | 1                | -1.694695               | 1.775555  | -2.234586 |
| 45               | 1                | -0.554266               | 2.793728  | -3.114453 |

|    |   |           |           |           |
|----|---|-----------|-----------|-----------|
| 46 | 1 | 0.128087  | 0.704163  | -4.204402 |
| 47 | 1 | 0.956194  | -0.511874 | -3.261232 |
| 48 | 1 | 1.687909  | 2.699167  | -1.890109 |
| 49 | 1 | 2.065155  | 1.628643  | -3.214674 |
| 50 | 8 | 1.196350  | -1.361620 | 2.090759  |
| 51 | 8 | 2.218582  | -3.135929 | 2.994277  |
| 52 | 8 | -0.440876 | 1.254361  | 2.498051  |
| 53 | 8 | -0.480317 | 3.189024  | 3.643346  |
| 54 | 8 | 3.847414  | -0.160583 | -4.307078 |
| 55 | 1 | 3.413174  | -0.258886 | -3.442570 |
| 56 | 1 | 4.782162  | -0.009725 | -4.055077 |
| 57 | 8 | 5.991301  | 0.251510  | -2.710484 |
| 58 | 1 | 5.466942  | 0.868488  | -2.157508 |
| 59 | 1 | 5.990340  | -0.590114 | -2.218564 |
| 60 | 8 | 0.917767  | 0.007130  | 4.393884  |
| 61 | 1 | 1.415688  | -0.458958 | 3.692318  |
| 62 | 8 | -0.362010 | -2.345502 | 4.444959  |
| 63 | 1 | 0.013948  | -1.461335 | 4.661422  |
| 64 | 1 | 0.394123  | -2.921323 | 4.256126  |
| 65 | 1 | 0.251077  | 0.519830  | 3.871568  |
| 66 | 8 | 2.027014  | 2.503201  | 4.679363  |
| 67 | 1 | 1.166409  | 2.941802  | 4.543425  |
| 68 | 1 | 1.823408  | 1.551393  | 4.775693  |
| 69 | 8 | 4.764183  | -1.957057 | 2.046007  |
| 70 | 1 | 4.841344  | -2.231924 | 1.116410  |
| 71 | 1 | 3.998649  | -2.369497 | 2.472901  |
| 72 | 8 | 2.373626  | 2.740673  | 1.979969  |
| 73 | 1 | 2.428350  | 2.650662  | 2.953985  |
| 74 | 1 | 2.303499  | 1.882732  | 1.520430  |
| 75 | 8 | 5.772375  | 0.300151  | 0.901934  |
| 76 | 1 | 5.150985  | 0.883276  | 0.421150  |
| 77 | 1 | 5.311415  | -0.227159 | 1.581652  |
| 78 | 8 | 3.419920  | 3.983736  | -0.101015 |
| 79 | 1 | 3.009885  | 3.731249  | 0.761442  |
| 80 | 1 | 3.852505  | 3.175479  | -0.444057 |
| 81 | 8 | 5.348357  | -1.720926 | -0.773559 |
| 82 | 1 | 5.669620  | -0.975215 | -0.209177 |
| 83 | 1 | 4.455767  | -1.480390 | -1.105333 |
| 84 | 8 | 2.369202  | -2.436315 | -3.709230 |
| 85 | 1 | 2.561547  | -2.045763 | -2.834342 |
| 86 | 1 | 2.870787  | -1.879969 | -4.329996 |
| 87 | 8 | 2.211024  | 5.016237  | -2.171724 |
| 88 | 1 | 2.600142  | 4.722429  | -1.298910 |
| 89 | 1 | 2.803737  | 4.668188  | -2.853511 |
| 90 | 8 | -1.645780 | -1.591258 | 2.125859  |
| 91 | 8 | -4.014422 | -0.600868 | 2.412440  |
| 92 | 8 | -5.084492 | 2.572487  | -0.897402 |
| 93 | 8 | -6.890416 | 0.424341  | -0.256582 |
| 94 | 8 | -2.380086 | -4.013362 | 1.142433  |
| 95 | 8 | -4.773137 | -3.961545 | -0.352340 |



|     |   |           |           |           |
|-----|---|-----------|-----------|-----------|
| 96  | 8 | -6.528248 | 1.280376  | -2.797740 |
| 97  | 8 | -3.722850 | 1.949870  | 1.496223  |
| 98  | 1 | -4.001706 | 0.377564  | 2.343698  |
| 99  | 1 | -4.339455 | 2.417059  | 0.907359  |
| 100 | 1 | -3.143219 | 1.404449  | 0.923702  |
| 101 | 1 | -6.378895 | 1.231813  | -0.084611 |
| 102 | 1 | -6.227049 | -0.304069 | -0.211927 |
| 103 | 1 | -4.453587 | 1.917010  | -1.269179 |
| 104 | 1 | -5.792321 | 2.580044  | -1.568669 |
| 105 | 1 | -5.628901 | 0.899038  | -2.853299 |
| 106 | 1 | -6.916925 | 0.862288  | -1.999505 |
| 107 | 1 | -4.938549 | -3.002625 | -0.314338 |
| 108 | 1 | -4.014911 | -4.124309 | 0.236174  |
| 109 | 1 | -2.551608 | -1.163907 | 2.298806  |
| 110 | 1 | -1.211965 | -1.861412 | 2.971196  |
| 111 | 1 | -2.143582 | -3.129629 | 1.504315  |
| 112 | 1 | -1.606640 | -4.387216 | 0.708589  |
| 113 | 1 | -4.410312 | -0.923819 | 1.572926  |

---

HF = -3873.6037888 Hartree

Zero-point correction = 0.965335

Sum of electronic and thermal free energies = -3872.742211

| Center<br>Number | Atomic<br>Number | Coordinates (Angstroms) |           |           |
|------------------|------------------|-------------------------|-----------|-----------|
|                  |                  | x                       | y         | z         |
| 1                | 64               | -0.233859               | -0.116898 | 0.525450  |
| 2                | 7                | -0.641611               | 2.482755  | 0.168566  |
| 3                | 7                | 0.566022                | -2.729690 | -0.108201 |
| 4                | 7                | -1.177006               | -1.598703 | -2.070323 |
| 5                | 7                | 0.271274                | 1.087623  | -2.165030 |
| 6                | 8                | -2.431814               | 0.096343  | -0.068314 |
| 7                | 8                | 1.929835                | 0.639137  | 0.206382  |
| 8                | 15               | -3.477330               | -0.571512 | -0.981209 |
| 9                | 15               | 2.739782                | 0.718728  | -1.092746 |
| 10               | 8                | -3.898936               | 0.390851  | -2.076400 |
| 11               | 8                | -4.636693               | -1.162776 | -0.189816 |
| 12               | 8                | 4.042867                | 1.490957  | -0.940158 |
| 13               | 8                | 2.954494                | -0.658816 | -1.716486 |
| 14               | 6                | -0.764833               | 5.211706  | 0.007909  |
| 15               | 6                | 0.603894                | -4.789780 | -1.274802 |
| 16               | 6                | 0.258427                | -3.442555 | -1.188120 |
| 17               | 6                | -0.374079               | -2.786655 | -2.384379 |
| 18               | 6                | -1.175890               | -0.674019 | -3.232306 |
| 19               | 6                | -2.560723               | -1.980052 | -1.671024 |
| 20               | 6                | 1.640502                | -4.625358 | 0.854258  |
| 21               | 6                | 1.251527                | -3.308825 | 0.881700  |
| 22               | 6                | 1.598989                | -2.475988 | 2.083424  |
| 23               | 6                | 1.300603                | -5.386015 | -0.249741 |
| 24               | 6                | -0.758247               | 4.590509  | 1.238667  |
| 25               | 6                | -0.677537               | 3.218322  | 1.269519  |
| 26               | 6                | -0.576222               | 2.489922  | 2.572106  |
| 27               | 6                | -0.719646               | 4.442855  | -1.139716 |
| 28               | 6                | -0.685189               | 3.065370  | -1.026139 |
| 29               | 6                | -0.741328               | 2.166709  | -2.234081 |
| 30               | 6                | 0.109404                | 0.138412  | -3.296741 |
| 31               | 6                | 1.667298                | 1.657060  | -2.206080 |
| 32               | 1                | -0.779164               | 6.281045  | -0.063989 |
| 33               | 1                | 0.334684                | -5.338730 | -2.153196 |
| 34               | 1                | 0.449167                | -2.524591 | -3.037087 |
| 35               | 1                | -0.980788               | -3.523878 | -2.911300 |
| 36               | 1                | -1.265619               | -1.245978 | -4.158903 |
| 37               | 1                | -2.049677               | -0.051643 | -3.163289 |
| 38               | 1                | -2.497824               | -2.736238 | -0.903674 |
| 39               | 1                | -3.096705               | -2.428668 | -2.508452 |
| 40               | 1                | 2.186997                | -5.009339 | 1.686226  |
| 41               | 1                | 1.578812                | -6.419697 | -0.309104 |
| 42               | 1                | -0.777917               | 5.122140  | 2.163971  |
| 43               | 1                | -0.646859               | 4.897654  | -2.102398 |
| 44               | 1                | -1.726084               | 1.722853  | -2.260863 |
| 45               | 1                | -0.600684               | 2.763250  | -3.134271 |

|    |   |           |           |           |
|----|---|-----------|-----------|-----------|
| 46 | 1 | 0.121730  | 0.694998  | -4.237349 |
| 47 | 1 | 0.964183  | -0.515069 | -3.299264 |
| 48 | 1 | 1.641682  | 2.694460  | -1.907364 |
| 49 | 1 | 2.049934  | 1.624807  | -3.224341 |
| 50 | 8 | 1.179098  | -1.287561 | 2.081392  |
| 51 | 8 | 2.256311  | -3.024075 | 2.991993  |
| 52 | 8 | -0.473443 | 1.205596  | 2.465444  |
| 53 | 8 | -0.555638 | 3.131151  | 3.623021  |
| 54 | 8 | 3.856203  | -0.098436 | -4.291702 |
| 55 | 1 | 3.423628  | -0.225151 | -3.429827 |
| 56 | 1 | 4.784590  | 0.080050  | -4.035095 |
| 57 | 8 | 5.977630  | 0.362971  | -2.677633 |
| 58 | 1 | 5.432402  | 0.958475  | -2.121515 |
| 59 | 1 | 5.997408  | -0.483102 | -2.193981 |
| 60 | 8 | 0.876323  | 0.021649  | 4.415421  |
| 61 | 1 | 1.396311  | -0.425303 | 3.718236  |
| 62 | 8 | -0.336356 | -2.369667 | 4.418388  |
| 63 | 1 | 0.006113  | -1.478429 | 4.657125  |
| 64 | 1 | 0.442645  | -2.915115 | 4.231605  |
| 65 | 1 | 0.201669  | 0.510050  | 3.881524  |
| 66 | 8 | 1.957522  | 2.525868  | 4.683434  |
| 67 | 1 | 1.093337  | 2.952406  | 4.533192  |
| 68 | 1 | 1.760068  | 1.573876  | 4.791737  |
| 69 | 8 | 4.796380  | -1.881038 | 2.066107  |
| 70 | 1 | 4.878986  | -2.155531 | 1.136846  |
| 71 | 1 | 4.020111  | -2.282981 | 2.484642  |
| 72 | 8 | 2.309567  | 2.732070  | 1.982669  |
| 73 | 1 | 2.363525  | 2.648422  | 2.957313  |
| 74 | 1 | 2.246738  | 1.872703  | 1.526597  |
| 75 | 8 | 5.757277  | 0.392005  | 0.922568  |
| 76 | 1 | 5.113151  | 0.952715  | 0.443970  |
| 77 | 1 | 5.316093  | -0.152299 | 1.602386  |
| 78 | 8 | 3.312634  | 4.006094  | -0.100953 |
| 79 | 1 | 2.907721  | 3.748130  | 0.761686  |
| 80 | 1 | 3.760495  | 3.203089  | -0.437443 |
| 81 | 8 | 5.377150  | -1.637920 | -0.755091 |
| 82 | 1 | 5.678756  | -0.883500 | -0.191523 |
| 83 | 1 | 4.480125  | -1.421324 | -1.091527 |
| 84 | 8 | 2.415504  | -2.413033 | -3.735502 |
| 85 | 1 | 2.591941  | -2.028650 | -2.854453 |
| 86 | 1 | 2.909684  | -1.839247 | -4.345966 |
| 87 | 8 | 2.121240  | 5.032120  | -2.185817 |
| 88 | 1 | 2.499846  | 4.739486  | -1.308305 |
| 89 | 1 | 2.724982  | 4.688177  | -2.859914 |
| 90 | 8 | -1.594969 | -1.601426 | 2.078328  |
| 91 | 8 | -3.978754 | -0.659944 | 2.405466  |
| 92 | 8 | -5.060384 | 2.533399  | -0.882819 |
| 93 | 8 | -6.852022 | 0.368548  | -0.259875 |
| 94 | 8 | -2.305722 | -4.039425 | 1.105889  |
| 95 | 8 | -4.723065 | -4.007837 | -0.349018 |

|     |   |           |           |           |
|-----|---|-----------|-----------|-----------|
| 96  | 8 | -6.490421 | 1.240459  | -2.795096 |
| 97  | 8 | -3.699450 | 1.889534  | 1.494098  |
| 98  | 1 | -3.975919 | 0.318781  | 2.344092  |
| 99  | 1 | -4.311393 | 2.360824  | 0.903335  |
| 100 | 1 | -3.112126 | 1.349239  | 0.926194  |
| 101 | 1 | -6.346729 | 1.178502  | -0.081314 |
| 102 | 1 | -6.183605 | -0.355464 | -0.217072 |
| 103 | 1 | -4.426161 | 1.882285  | -1.258480 |
| 104 | 1 | -5.768054 | 2.542504  | -1.553878 |
| 105 | 1 | -5.587577 | 0.867956  | -2.849551 |
| 106 | 1 | -6.877144 | 0.815807  | -1.999288 |
| 107 | 1 | -4.888580 | -3.048908 | -0.313502 |
| 108 | 1 | -3.952326 | -4.166362 | 0.224143  |
| 109 | 1 | -2.508138 | -1.193281 | 2.257742  |
| 110 | 1 | -1.162504 | -1.873015 | 2.922757  |
| 111 | 1 | -2.076976 | -3.151485 | 1.460687  |
| 112 | 1 | -1.525081 | -4.416744 | 0.688154  |
| 113 | 1 | -4.375121 | -0.979707 | 1.564646  |

---

HF = -3876.01405101 Hartree

Zero-point correction = 0.965649

Sum of electronic and thermal free energies = -3875.151867

$[\text{Ho}(\text{L}^2)(\text{H}_2\text{O})]^{3+} \cdot 19\text{H}_2\text{O}$  (*tw*)

(0 imaginary frequencies)

| Center<br>Number | Atomic<br>Number | Coordinates (Angstroms) |           |           |
|------------------|------------------|-------------------------|-----------|-----------|
|                  |                  | x                       | y         | z         |
| 1                | 67               | -0.234865               | -0.114885 | 0.550371  |
| 2                | 7                | -0.674451               | 2.450420  | 0.156178  |
| 3                | 7                | 0.588822                | -2.698312 | -0.120744 |
| 4                | 7                | -1.167575               | -1.620173 | -2.110465 |
| 5                | 7                | 0.254836                | 1.075206  | -2.189354 |
| 6                | 8                | -2.384390               | 0.036636  | -0.064282 |
| 7                | 8                | 1.873688                | 0.642484  | 0.195491  |
| 8                | 15               | -3.442592               | -0.601432 | -0.985569 |
| 9                | 15               | 2.705639                | 0.731148  | -1.090225 |
| 10               | 8                | -3.861844               | 0.388541  | -2.057402 |
| 11               | 8                | -4.604469               | -1.191866 | -0.197035 |
| 12               | 8                | 3.998809                | 1.515209  | -0.911837 |
| 13               | 8                | 2.948006                | -0.643282 | -1.709862 |
| 14               | 6                | -0.829559               | 5.179801  | -0.005502 |
| 15               | 6                | 0.664130                | -4.766268 | -1.274645 |
| 16               | 6                | 0.294556                | -3.424275 | -1.196372 |
| 17               | 6                | -0.348175               | -2.797186 | -2.403237 |
| 18               | 6                | -1.167018               | -0.697328 | -3.270277 |
| 19               | 6                | -2.546354               | -2.004058 | -1.706947 |
| 20               | 6                | 1.698621                | -4.571788 | 0.850583  |
| 21               | 6                | 1.286996                | -3.262130 | 0.870431  |
| 22               | 6                | 1.624507                | -2.421788 | 2.068363  |
| 23               | 6                | 1.371242                | -5.345454 | -0.248021 |
| 24               | 6                | -0.820032               | 4.558649  | 1.225169  |
| 25               | 6                | -0.722608               | 3.187725  | 1.255801  |
| 26               | 6                | -0.615798               | 2.462062  | 2.557850  |
| 27               | 6                | -0.772590               | 4.410568  | -1.151926 |
| 28               | 6                | -0.723810               | 3.033061  | -1.038798 |
| 29               | 6                | -0.771702               | 2.139059  | -2.250029 |
| 30               | 6                | 0.109159                | 0.129885  | -3.324569 |
| 31               | 6                | 1.643512                | 1.659586  | -2.218837 |
| 32               | 1                | -0.855620               | 6.248859  | -0.078004 |
| 33               | 1                | 0.404019                | -5.324012 | -2.150169 |
| 34               | 1                | 0.472919                | -2.533061 | -3.057785 |
| 35               | 1                | -0.939818               | -3.554803 | -2.918887 |
| 36               | 1                | -1.244497               | -1.267598 | -4.199470 |
| 37               | 1                | -2.046806               | -0.082855 | -3.204770 |
| 38               | 1                | -2.482289               | -2.770660 | -0.949850 |
| 39               | 1                | -3.093678               | -2.436809 | -2.545858 |
| 40               | 1                | 2.253458                | -4.940610 | 1.683787  |
| 41               | 1                | 1.667464                | -6.374420 | -0.301721 |
| 42               | 1                | -0.849186               | 5.089895  | 2.150424  |
| 43               | 1                | -0.701442               | 4.865569  | -2.114531 |
| 44               | 1                | -1.751216               | 1.683659  | -2.275877 |
| 45               | 1                | -0.642321               | 2.743754  | -3.146854 |

|    |   |           |           |           |
|----|---|-----------|-----------|-----------|
| 46 | 1 | 0.120367  | 0.689331  | -4.263883 |
| 47 | 1 | 0.971223  | -0.514131 | -3.324934 |
| 48 | 1 | 1.605287  | 2.697052  | -1.921419 |
| 49 | 1 | 2.039961  | 1.627382  | -3.231612 |
| 50 | 8 | 1.179805  | -1.242796 | 2.069851  |
| 51 | 8 | 2.296717  | -2.955471 | 2.975376  |
| 52 | 8 | -0.493210 | 1.178640  | 2.449718  |
| 53 | 8 | -0.606961 | 3.100697  | 3.610057  |
| 54 | 8 | 3.846383  | -0.058121 | -4.278274 |
| 55 | 1 | 3.418923  | -0.203044 | -3.416432 |
| 56 | 1 | 4.770016  | 0.144240  | -4.022661 |
| 57 | 8 | 5.956202  | 0.445659  | -2.663221 |
| 58 | 1 | 5.399497  | 1.024358  | -2.100910 |
| 59 | 1 | 5.991472  | -0.405049 | -2.188723 |
| 60 | 8 | 0.865264  | 0.037108  | 4.422308  |
| 61 | 1 | 1.396172  | -0.397348 | 3.725707  |
| 62 | 8 | -0.293993 | -2.383941 | 4.405776  |
| 63 | 1 | 0.022844  | -1.486763 | 4.655103  |
| 64 | 1 | 0.500854  | -2.904177 | 4.212772  |
| 65 | 1 | 0.181522  | 0.508982  | 3.885761  |
| 66 | 8 | 1.916326  | 2.553489  | 4.671921  |
| 67 | 1 | 1.046832  | 2.968077  | 4.519634  |
| 68 | 1 | 1.729324  | 1.600146  | 4.786845  |
| 69 | 8 | 4.856592  | -1.862298 | 2.066829  |
| 70 | 1 | 4.935015  | -2.120688 | 1.132334  |
| 71 | 1 | 4.063570  | -2.246323 | 2.471533  |
| 72 | 8 | 2.252187  | 2.744721  | 1.966606  |
| 73 | 1 | 2.312216  | 2.664619  | 2.941165  |
| 74 | 1 | 2.199503  | 1.884041  | 1.512398  |
| 75 | 8 | 5.749182  | 0.446395  | 0.928425  |
| 76 | 1 | 5.085783  | 0.993129  | 0.459359  |
| 77 | 1 | 5.329493  | -0.116186 | 1.607105  |
| 78 | 8 | 3.242482  | 4.032130  | -0.117192 |
| 79 | 1 | 2.831940  | 3.771612  | 0.741821  |
| 80 | 1 | 3.700863  | 3.231042  | -0.444123 |
| 81 | 8 | 5.393276  | -1.579498 | -0.757301 |
| 82 | 1 | 5.685284  | -0.821191 | -0.193886 |
| 83 | 1 | 4.490224  | -1.378329 | -1.087669 |
| 84 | 8 | 2.448920  | -2.404351 | -3.739655 |
| 85 | 1 | 2.608223  | -2.019267 | -2.855615 |
| 86 | 1 | 2.934925  | -1.817397 | -4.343944 |
| 87 | 8 | 2.053352  | 5.048766  | -2.210058 |
| 88 | 1 | 2.430452  | 4.758006  | -1.331436 |
| 89 | 1 | 2.657650  | 4.702859  | -2.882580 |
| 90 | 8 | -1.551742 | -1.613818 | 2.066262  |
| 91 | 8 | -3.947579 | -0.719882 | 2.400527  |
| 92 | 8 | -5.040062 | 2.511598  | -0.858157 |
| 93 | 8 | -6.820827 | 0.334236  | -0.255310 |
| 94 | 8 | -2.260905 | -4.040043 | 1.066155  |
| 95 | 8 | -4.694251 | -4.039721 | -0.353379 |

|     |   |           |           |           |
|-----|---|-----------|-----------|-----------|
| 96  | 8 | -6.460720 | 1.223502  | -2.784090 |
| 97  | 8 | -3.678291 | 1.827184  | 1.500206  |
| 98  | 1 | -3.954159 | 0.259409  | 2.350831  |
| 99  | 1 | -4.281812 | 2.312789  | 0.912301  |
| 100 | 1 | -3.088892 | 1.290647  | 0.932351  |
| 101 | 1 | -6.318425 | 1.144518  | -0.069970 |
| 102 | 1 | -6.149671 | -0.387779 | -0.217215 |
| 103 | 1 | -4.403329 | 1.866039  | -1.240989 |
| 104 | 1 | -5.748704 | 2.525782  | -1.527587 |
| 105 | 1 | -5.555280 | 0.858494  | -2.841269 |
| 106 | 1 | -6.843343 | 0.792276  | -1.989673 |
| 107 | 1 | -4.860990 | -3.080952 | -0.320488 |
| 108 | 1 | -3.911766 | -4.191577 | 0.205573  |
| 109 | 1 | -2.474325 | -1.225612 | 2.247003  |
| 110 | 1 | -1.119847 | -1.888095 | 2.909803  |
| 111 | 1 | -2.030732 | -3.156519 | 1.430934  |
| 112 | 1 | -1.465861 | -4.443691 | 0.703535  |
| 113 | 1 | -4.338474 | -1.032046 | 1.553662  |

---

HF = -3877.7687759 Hartree

Zero-point correction = 0.965338

Sum of electronic and thermal free energies = -3876.906772

[Lu(L<sup>2</sup>)(H<sub>2</sub>O)]<sup>3-</sup> 19H<sub>2</sub>O (*tw*)

(0 imaginary frequencies)

| Center<br>Number | Atomic<br>Number | Coordinates (Angstroms) |           |           |
|------------------|------------------|-------------------------|-----------|-----------|
|                  |                  | x                       | y         | z         |
| 1                | 71               | -0.242873               | -0.107955 | 0.589800  |
| 2                | 7                | -0.698277               | 2.419976  | 0.126061  |
| 3                | 7                | 0.608234                | -2.660842 | -0.128586 |
| 4                | 7                | -1.154188               | -1.648451 | -2.161862 |
| 5                | 7                | 0.238788                | 1.055006  | -2.240654 |
| 6                | 8                | -2.328180               | -0.018156 | -0.065798 |
| 7                | 8                | 1.800701                | 0.627397  | 0.170574  |
| 8                | 15               | -3.397289               | -0.638817 | -0.988205 |
| 9                | 15               | 2.661183                | 0.724009  | -1.097465 |
| 10               | 8                | -3.823478               | 0.367585  | -2.042485 |
| 11               | 8                | -4.556574               | -1.230437 | -0.196069 |
| 12               | 8                | 3.941657                | 1.521730  | -0.885182 |
| 13               | 8                | 2.938030                | -0.646955 | -1.708964 |
| 14               | 6                | -0.873264               | 5.150373  | -0.053466 |
| 15               | 6                | 0.773520                | -4.723316 | -1.286805 |
| 16               | 6                | 0.349772                | -3.396625 | -1.207898 |
| 17               | 6                | -0.312907               | -2.810080 | -2.426263 |
| 18               | 6                | -1.161820               | -0.731696 | -3.321993 |
| 19               | 6                | -2.521174               | -2.036233 | -1.737478 |
| 20               | 6                | 1.784549                | -4.496833 | 0.843401  |
| 21               | 6                | 1.323382                | -3.204030 | 0.863821  |
| 22               | 6                | 1.627875                | -2.361026 | 2.067065  |
| 23               | 6                | 1.495650                | -5.279363 | -0.259268 |
| 24               | 6                | -0.860121               | 4.536963  | 1.180884  |
| 25               | 6                | -0.752749               | 3.167382  | 1.219400  |
| 26               | 6                | -0.644497               | 2.453422  | 2.526030  |
| 27               | 6                | -0.811266               | 4.373022  | -1.193314 |
| 28               | 6                | -0.753064               | 2.995742  | -1.072890 |
| 29               | 6                | -0.798795               | 2.103748  | -2.286177 |
| 30               | 6                | 0.104398                | 0.111874  | -3.375120 |
| 31               | 6                | 1.621539                | 1.644905  | -2.250753 |
| 32               | 1                | -0.906403               | 6.218673  | -0.133462 |
| 33               | 1                | 0.542138                | -5.286306 | -2.167010 |
| 34               | 1                | 0.500842                | -2.544823 | -3.089298 |
| 35               | 1                | -0.886265               | -3.596099 | -2.921052 |
| 36               | 1                | -1.231065               | -1.302785 | -4.251967 |
| 37               | 1                | -2.047493               | -0.125440 | -3.257577 |
| 38               | 1                | -2.444558               | -2.806508 | -0.985162 |
| 39               | 1                | -3.087709               | -2.463636 | -2.566830 |
| 40               | 1                | 2.347035                | -4.846412 | 1.679645  |
| 41               | 1                | 1.832775                | -6.295517 | -0.314927 |
| 42               | 1                | -0.894066               | 5.073453  | 2.102975  |
| 43               | 1                | -0.742669               | 4.821761  | -2.158924 |
| 44               | 1                | -1.772823               | 1.636895  | -2.305105 |
| 45               | 1                | -0.687337               | 2.716765  | -3.180521 |



|    |   |           |           |           |
|----|---|-----------|-----------|-----------|
| 46 | 1 | 0.109314  | 0.670341  | -4.315807 |
| 47 | 1 | 0.973363  | -0.523206 | -3.375525 |
| 48 | 1 | 1.575349  | 2.683679  | -1.958712 |
| 49 | 1 | 2.039598  | 1.608582  | -3.254644 |
| 50 | 8 | 1.158152  | -1.192045 | 2.069867  |
| 51 | 8 | 2.301721  | -2.881062 | 2.981652  |
| 52 | 8 | -0.510597 | 1.169097  | 2.426210  |
| 53 | 8 | -0.645121 | 3.095214  | 3.575386  |
| 54 | 8 | 3.861611  | -0.038719 | -4.266172 |
| 55 | 1 | 3.425680  | -0.196248 | -3.410858 |
| 56 | 1 | 4.777273  | 0.181985  | -3.997529 |
| 57 | 8 | 5.939547  | 0.501933  | -2.624094 |
| 58 | 1 | 5.366324  | 1.067754  | -2.065468 |
| 59 | 1 | 5.985254  | -0.349643 | -2.152203 |
| 60 | 8 | 0.846047  | 0.073895  | 4.433696  |
| 61 | 1 | 1.386731  | -0.357606 | 3.743686  |
| 62 | 8 | -0.276077 | -2.366595 | 4.413490  |
| 63 | 1 | 0.023567  | -1.466066 | 4.669549  |
| 64 | 1 | 0.528812  | -2.869302 | 4.214949  |
| 65 | 1 | 0.158378  | 0.528990  | 3.888981  |
| 66 | 8 | 1.881365  | 2.596582  | 4.653701  |
| 67 | 1 | 1.010710  | 3.004467  | 4.491319  |
| 68 | 1 | 1.697067  | 1.644783  | 4.784661  |
| 69 | 8 | 4.859626  | -1.806899 | 2.097931  |
| 70 | 1 | 4.944047  | -2.067985 | 1.164573  |
| 71 | 1 | 4.062013  | -2.187009 | 2.497607  |
| 72 | 8 | 2.212503  | 2.746990  | 1.946630  |
| 73 | 1 | 2.276739  | 2.676073  | 2.921587  |
| 74 | 1 | 2.161095  | 1.883652  | 1.499565  |
| 75 | 8 | 5.715449  | 0.510076  | 0.952010  |
| 76 | 1 | 5.036501  | 1.036114  | 0.480483  |
| 77 | 1 | 5.310893  | -0.060869 | 1.632896  |
| 78 | 8 | 3.167810  | 4.042472  | -0.151646 |
| 79 | 1 | 2.761398  | 3.788681  | 0.710300  |
| 80 | 1 | 3.631570  | 3.238753  | -0.465536 |
| 81 | 8 | 5.390824  | -1.531249 | -0.724125 |
| 82 | 1 | 5.667656  | -0.763539 | -0.166008 |
| 83 | 1 | 4.487404  | -1.347760 | -1.064119 |
| 84 | 8 | 2.486059  | -2.405034 | -3.757292 |
| 85 | 1 | 2.627593  | -2.020747 | -2.869755 |
| 86 | 1 | 2.972541  | -1.810080 | -4.353040 |
| 87 | 8 | 1.996649  | 5.053286  | -2.259144 |
| 88 | 1 | 2.365252  | 4.764186  | -1.376769 |
| 89 | 1 | 2.602398  | 4.699180  | -2.925970 |
| 90 | 8 | -1.519917 | -1.598550 | 2.063103  |
| 91 | 8 | -3.929645 | -0.748429 | 2.397206  |
| 92 | 8 | -5.026751 | 2.475281  | -0.863189 |
| 93 | 8 | -6.785561 | 0.275861  | -0.259479 |
| 94 | 8 | -2.189735 | -4.042736 | 1.066242  |
| 95 | 8 | -4.638126 | -4.081534 | -0.324638 |

|     |   |           |           |           |
|-----|---|-----------|-----------|-----------|
| 96  | 8 | -6.433148 | 1.168169  | -2.786728 |
| 97  | 8 | -3.670828 | 1.787760  | 1.479145  |
| 98  | 1 | -3.946711 | 0.230427  | 2.343060  |
| 99  | 1 | -4.271336 | 2.270754  | 0.885352  |
| 100 | 1 | -3.068900 | 1.258053  | 0.920452  |
| 101 | 1 | -6.292411 | 1.091185  | -0.071927 |
| 102 | 1 | -6.106881 | -0.439223 | -0.220878 |
| 103 | 1 | -4.384329 | 1.832830  | -1.243767 |
| 104 | 1 | -5.736801 | 2.479356  | -1.531099 |
| 105 | 1 | -5.523309 | 0.814256  | -2.840135 |
| 106 | 1 | -6.812978 | 0.733631  | -1.992719 |
| 107 | 1 | -4.807857 | -3.123029 | -0.303420 |
| 108 | 1 | -3.847222 | -4.221753 | 0.225449  |
| 109 | 1 | -2.450702 | -1.228869 | 2.239500  |
| 110 | 1 | -1.092431 | -1.871241 | 2.908826  |
| 111 | 1 | -1.974666 | -3.153756 | 1.425051  |
| 112 | 1 | -1.393063 | -4.423721 | 0.683490  |
| 113 | 1 | -4.311879 | -1.067781 | 1.548568  |

---

HF = -3880.0804769 Hartree

Zero-point correction = 0.966038

Sum of electronic and thermal free energies = -3879.217659

| Center<br>Number | Atomic<br>Number | Coordinates (Angstroms) |           |           |
|------------------|------------------|-------------------------|-----------|-----------|
|                  |                  | x                       | y         | z         |
| 1                | 57               | -0.427682               | -0.083001 | 0.652362  |
| 2                | 7                | -1.017458               | 2.199722  | -0.726771 |
| 3                | 7                | 1.019526                | -2.385259 | 1.106532  |
| 4                | 7                | -1.082530               | -2.510478 | -0.873154 |
| 5                | 7                | 0.117941                | 0.017446  | -2.212961 |
| 6                | 8                | -2.763272               | -0.285202 | 0.028341  |
| 7                | 8                | 1.889157                | 0.431880  | 0.104710  |
| 8                | 15               | -3.620837               | -1.500659 | -0.372461 |
| 9                | 15               | 2.661649                | 0.146518  | -1.181300 |
| 10               | 8                | -4.146845               | -1.324479 | -1.787397 |
| 11               | 8                | -4.702959               | -1.818862 | 0.648999  |
| 12               | 8                | 3.881665                | 1.027583  | -1.417028 |
| 13               | 8                | 3.000708                | -1.337902 | -1.344323 |
| 14               | 6                | -1.172876               | 4.614013  | -1.994217 |
| 15               | 6                | 1.983367                | -4.407258 | 0.360784  |
| 16               | 6                | 0.974335                | -3.443027 | 0.318389  |
| 17               | 6                | -0.121350               | -3.634766 | -0.707455 |
| 18               | 6                | -1.180999               | -2.143120 | -2.320829 |
| 19               | 6                | -2.437559               | -2.888550 | -0.348278 |
| 20               | 6                | 3.090176                | -3.109300 | 2.018600  |
| 21               | 6                | 2.060434                | -2.212129 | 1.933253  |
| 22               | 6                | 2.085013                | -0.966552 | 2.779320  |
| 23               | 6                | 3.044237                | -4.237583 | 1.211629  |
| 24               | 6                | -1.303520               | 4.543538  | -0.619386 |
| 25               | 6                | -1.191269               | 3.308502  | -0.021579 |
| 26               | 6                | -1.230362               | 3.177509  | 1.477712  |
| 27               | 6                | -0.982195               | 3.454935  | -2.723311 |
| 28               | 6                | -0.955110               | 2.242578  | -2.054041 |
| 29               | 6                | -0.909086               | 0.920282  | -2.782312 |
| 30               | 6                | 0.023370                | -1.348384 | -2.802128 |
| 31               | 6                | 1.488191                | 0.574509  | -2.494363 |
| 32               | 1                | -1.196602               | 5.561581  | -2.494737 |
| 33               | 1                | 1.951827                | -5.221606 | -0.331640 |
| 34               | 1                | 0.399635                | -3.810674 | -1.639212 |
| 35               | 1                | -0.668192               | -4.539448 | -0.455744 |
| 36               | 1                | -1.244256               | -3.055100 | -2.915495 |
| 37               | 1                | -2.104551               | -1.615295 | -2.470903 |
| 38               | 1                | -2.343721               | -3.226948 | 0.672244  |
| 39               | 1                | -2.838513               | -3.718738 | -0.932784 |
| 40               | 1                | 3.916299                | -2.899841 | 2.660674  |
| 41               | 1                | 3.846804                | -4.947589 | 1.228683  |
| 42               | 1                | -1.462249               | 5.400369  | -0.001436 |
| 43               | 1                | -0.759849               | 3.489329  | -3.766119 |
| 44               | 1                | -1.881593               | 0.459821  | -2.671153 |
| 45               | 1                | -0.720475               | 1.094251  | -3.839085 |

|    |   |           |           |           |
|----|---|-----------|-----------|-----------|
| 46 | 1 | -0.025102 | -1.267064 | -3.889373 |
| 47 | 1 | 0.931870  | -1.870818 | -2.565138 |
| 48 | 1 | 1.424132  | 1.648519  | -2.561912 |
| 49 | 1 | 1.840863  | 0.205190  | -3.454586 |
| 50 | 8 | 1.001445  | -0.286834 | 2.802811  |
| 51 | 8 | 3.120971  | -0.708446 | 3.407549  |
| 52 | 8 | -1.149958 | 1.975863  | 1.927743  |
| 53 | 8 | -1.286977 | 4.209006  | 2.153245  |
| 54 | 8 | 3.461402  | -1.660205 | -4.054144 |
| 55 | 1 | 3.218069  | -1.525054 | -3.119499 |
| 56 | 1 | 4.365634  | -1.287613 | -4.091462 |
| 57 | 8 | 5.671093  | -0.411203 | -3.154119 |
| 58 | 1 | 5.147897  | 0.283436  | -2.705405 |
| 59 | 1 | 5.896145  | -1.046427 | -2.450351 |
| 60 | 8 | 0.963721  | 2.137796  | 3.921019  |
| 61 | 1 | 1.105343  | 1.265670  | 3.482120  |
| 62 | 8 | 2.659791  | 0.909420  | 5.849117  |
| 63 | 1 | 2.034860  | 1.517484  | 5.421501  |
| 64 | 1 | 2.993031  | 0.341295  | 5.135208  |
| 65 | 1 | 0.019239  | 2.326660  | 3.825616  |
| 66 | 8 | 1.522408  | 4.357193  | 2.513542  |
| 67 | 1 | 0.585720  | 4.611453  | 2.533377  |
| 68 | 1 | 1.592476  | 3.526120  | 3.033821  |
| 69 | 8 | 5.649315  | -0.933580 | 2.176603  |
| 70 | 1 | 5.558205  | -1.457376 | 1.362315  |
| 71 | 1 | 4.784214  | -0.803044 | 2.604673  |
| 72 | 8 | 2.058331  | 4.740341  | -0.029240 |
| 73 | 1 | 2.040787  | 4.535026  | 0.942418  |
| 74 | 1 | 1.145547  | 4.819773  | -0.328317 |
| 75 | 8 | 6.126514  | 0.843432  | 0.113009  |
| 76 | 1 | 5.286651  | 1.124198  | -0.311615 |
| 77 | 1 | 5.968437  | 0.537720  | 1.025867  |
| 78 | 8 | 3.059737  | 3.516589  | -2.181950 |
| 79 | 1 | 2.793839  | 3.989912  | -1.360407 |
| 80 | 1 | 3.485325  | 2.666506  | -1.939118 |
| 81 | 8 | 5.662116  | -1.673709 | -0.626930 |
| 82 | 1 | 5.965724  | -0.750072 | -0.451096 |
| 83 | 1 | 4.699848  | -1.653993 | -0.827073 |
| 84 | 8 | 2.416715  | -3.764163 | -2.588095 |
| 85 | 1 | 2.655925  | -3.104337 | -1.910367 |
| 86 | 1 | 2.754515  | -3.385087 | -3.418332 |
| 87 | 8 | 1.599516  | 3.474458  | -4.350547 |
| 88 | 1 | 2.138862  | 3.591268  | -3.515012 |
| 89 | 1 | 2.003698  | 2.736562  | -4.828087 |
| 90 | 8 | -3.023965 | 0.682924  | 3.522607  |
| 91 | 8 | -5.220356 | 0.464900  | 2.179759  |
| 92 | 8 | -5.733244 | 0.743669  | -2.059721 |
| 93 | 8 | -7.135527 | -1.097451 | -0.353643 |
| 94 | 8 | -1.552051 | -1.179370 | 2.770305  |
| 95 | 8 | -3.342755 | -3.369074 | 2.614129  |

|     |   |           |           |           |
|-----|---|-----------|-----------|-----------|
| 96  | 8 | -6.693627 | -1.666806 | -2.964219 |
| 97  | 8 | -4.376236 | 1.882412  | 0.057462  |
| 98  | 1 | -5.066534 | 1.124602  | 1.464475  |
| 99  | 1 | -4.958882 | 1.776699  | -0.716878 |
| 100 | 1 | -3.674298 | 1.196214  | 0.008935  |
| 101 | 1 | -6.800649 | -0.235004 | -0.651256 |
| 102 | 1 | -6.375503 | -1.527472 | 0.099270  |
| 103 | 1 | -5.011474 | 0.064255  | -1.987227 |
| 104 | 1 | -6.371134 | 0.322045  | -2.659716 |
| 105 | 1 | -5.739037 | -1.788264 | -2.799779 |
| 106 | 1 | -7.081503 | -1.652850 | -2.063453 |
| 107 | 1 | -4.014785 | -2.937675 | 2.054593  |
| 108 | 1 | -2.669185 | -2.688246 | 2.785869  |
| 109 | 1 | -3.941427 | 0.619906  | 3.120530  |
| 110 | 1 | -2.512219 | 1.375291  | 3.068902  |
| 111 | 1 | -2.214086 | -0.481610 | 3.153448  |
| 112 | 1 | -0.750264 | -1.213118 | 3.310559  |
| 113 | 1 | -5.145428 | -0.420222 | 1.767444  |

---

HF = -3871.6933072 Hartree

Zero-point correction = 0.964000

Sum of electronic and thermal free energies = -3870.833613

[Nd(L<sup>2</sup>)(H<sub>2</sub>O)]<sup>3+</sup>·19H<sub>2</sub>O (*tf*)

(0 imaginary frequencies)

| Center<br>Number | Atomic<br>Number | Coordinates (Angstroms) |           |           |
|------------------|------------------|-------------------------|-----------|-----------|
|                  |                  | x                       | y         | z         |
| 1                | 60               | -0.422931               | -0.110067 | 0.635564  |
| 2                | 7                | -1.009034               | 2.146764  | -0.697995 |
| 3                | 7                | 1.018007                | -2.362443 | 1.074199  |
| 4                | 7                | -1.086707               | -2.516719 | -0.885066 |
| 5                | 7                | 0.098131                | -0.003860 | -2.214908 |
| 6                | 8                | -2.713076               | -0.282965 | 0.048093  |
| 7                | 8                | 1.834394                | 0.427029  | 0.098856  |
| 8                | 15               | -3.597087               | -1.474911 | -0.367199 |
| 9                | 15               | 2.628144                | 0.153554  | -1.178190 |
| 10               | 8                | -4.117820               | -1.265686 | -1.780108 |
| 11               | 8                | -4.687863               | -1.783843 | 0.647660  |
| 12               | 8                | 3.839960                | 1.049666  | -1.397473 |
| 13               | 8                | 2.988393                | -1.326271 | -1.337392 |
| 14               | 6                | -1.216995               | 4.577664  | -1.926930 |
| 15               | 6                | 1.979043                | -4.397832 | 0.361251  |
| 16               | 6                | 0.970667                | -3.433743 | 0.305172  |
| 17               | 6                | -0.127765               | -3.640155 | -0.712761 |
| 18               | 6                | -1.188065               | -2.161776 | -2.334896 |
| 19               | 6                | -2.442397               | -2.884446 | -0.358941 |
| 20               | 6                | 3.092219                | -3.071800 | 1.991560  |
| 21               | 6                | 2.061349                | -2.177252 | 1.895052  |
| 22               | 6                | 2.079501                | -0.922952 | 2.726436  |
| 23               | 6                | 3.043614                | -4.213690 | 1.204216  |
| 24               | 6                | -1.315079               | 4.486488  | -0.550213 |
| 25               | 6                | -1.179280               | 3.244072  | 0.025552  |
| 26               | 6                | -1.198436               | 3.078397  | 1.519271  |
| 27               | 6                | -1.033595               | 3.430589  | -2.676282 |
| 28               | 6                | -0.979107               | 2.209148  | -2.024789 |
| 29               | 6                | -0.937674               | 0.897174  | -2.769223 |
| 30               | 6                | 0.010926                | -1.362937 | -2.816742 |
| 31               | 6                | 1.461854                | 0.566295  | -2.499260 |
| 32               | 1                | -1.261850               | 5.531883  | -2.413230 |
| 33               | 1                | 1.943149                | -5.225540 | -0.315008 |
| 34               | 1                | 0.389696                | -3.825669 | -1.644720 |
| 35               | 1                | -0.673575               | -4.541912 | -0.448446 |
| 36               | 1                | -1.246099               | -3.078421 | -2.923068 |
| 37               | 1                | -2.113888               | -1.638729 | -2.487722 |
| 38               | 1                | -2.351106               | -3.232974 | 0.657724  |
| 39               | 1                | -2.857049               | -3.703241 | -0.950056 |
| 40               | 1                | 3.921217                | -2.850986 | 2.626061  |
| 41               | 1                | 3.846043                | -4.923582 | 1.230759  |
| 42               | 1                | -1.469993               | 5.332712  | 0.083300  |
| 43               | 1                | -0.838169               | 3.480196  | -3.723892 |
| 44               | 1                | -1.907526               | 0.432059  | -2.654908 |
| 45               | 1                | -0.756826               | 1.083608  | -3.825282 |

|    |   |           |           |           |
|----|---|-----------|-----------|-----------|
| 46 | 1 | -0.041883 | -1.272748 | -3.903255 |
| 47 | 1 | 0.921997  | -1.884417 | -2.587182 |
| 48 | 1 | 1.387688  | 1.639070  | -2.573212 |
| 49 | 1 | 1.821003  | 0.194348  | -3.455758 |
| 50 | 8 | 0.984403  | -0.261794 | 2.753894  |
| 51 | 8 | 3.116644  | -0.646842 | 3.344127  |
| 52 | 8 | -1.115572 | 1.864855  | 1.932428  |
| 53 | 8 | -1.248662 | 4.089367  | 2.226449  |
| 54 | 8 | 3.455989  | -1.643018 | -4.045300 |
| 55 | 1 | 3.214458  | -1.513575 | -3.109205 |
| 56 | 1 | 4.353550  | -1.255373 | -4.086669 |
| 57 | 8 | 5.648782  | -0.361333 | -3.151079 |
| 58 | 1 | 5.119773  | 0.326270  | -2.699083 |
| 59 | 1 | 5.881114  | -0.997054 | -2.450010 |
| 60 | 8 | 1.007297  | 2.151059  | 3.910777  |
| 61 | 1 | 1.087453  | 1.282460  | 3.447700  |
| 62 | 8 | 2.743829  | 0.952867  | 5.801725  |
| 63 | 1 | 2.108717  | 1.552367  | 5.375618  |
| 64 | 1 | 3.058189  | 0.375562  | 5.086769  |
| 65 | 1 | 0.067424  | 2.378451  | 3.890407  |
| 66 | 8 | 1.556912  | 4.336004  | 2.449475  |
| 67 | 1 | 0.616684  | 4.574040  | 2.488337  |
| 68 | 1 | 1.644739  | 3.509787  | 2.974245  |
| 69 | 8 | 5.658047  | -0.918620 | 2.173279  |
| 70 | 1 | 5.572945  | -1.430336 | 1.350512  |
| 71 | 1 | 4.785911  | -0.774654 | 2.583290  |
| 72 | 8 | 2.045554  | 4.770746  | -0.094084 |
| 73 | 1 | 2.049776  | 4.546378  | 0.873492  |
| 74 | 1 | 1.125587  | 4.805233  | -0.379914 |
| 75 | 8 | 6.096452  | 0.886149  | 0.114242  |
| 76 | 1 | 5.248450  | 1.158905  | -0.299840 |
| 77 | 1 | 5.953445  | 0.575891  | 1.027642  |
| 78 | 8 | 3.019883  | 3.515324  | -2.240147 |
| 79 | 1 | 2.765178  | 4.008576  | -1.426625 |
| 80 | 1 | 3.441997  | 2.669195  | -1.978079 |
| 81 | 8 | 5.656079  | -1.631979 | -0.632788 |
| 82 | 1 | 5.948897  | -0.705045 | -0.455664 |
| 83 | 1 | 4.692171  | -1.623818 | -0.826893 |
| 84 | 8 | 2.417923  | -3.756644 | -2.590629 |
| 85 | 1 | 2.649935  | -3.097927 | -1.909489 |
| 86 | 1 | 2.757485  | -3.373018 | -3.418025 |
| 87 | 8 | 1.506442  | 3.450633  | -4.374648 |
| 88 | 1 | 2.068130  | 3.572729  | -3.554967 |
| 89 | 1 | 1.896485  | 2.709160  | -4.858294 |
| 90 | 8 | -2.973156 | 0.586218  | 3.546326  |
| 91 | 8 | -5.191584 | 0.461612  | 2.225545  |
| 92 | 8 | -5.667828 | 0.835214  | -2.020041 |
| 93 | 8 | -7.106806 | -1.012052 | -0.354050 |
| 94 | 8 | -1.515876 | -1.241372 | 2.681103  |
| 95 | 8 | -3.368309 | -3.396258 | 2.591852  |

|     |   |           |           |           |
|-----|---|-----------|-----------|-----------|
| 96  | 8 | -6.664305 | -1.542304 | -2.973068 |
| 97  | 8 | -4.306645 | 1.898110  | 0.135480  |
| 98  | 1 | -5.020615 | 1.134437  | 1.526547  |
| 99  | 1 | -4.884017 | 1.822246  | -0.646101 |
| 100 | 1 | -3.612995 | 1.204690  | 0.073816  |
| 101 | 1 | -6.757111 | -0.149997 | -0.635386 |
| 102 | 1 | -6.355528 | -1.461125 | 0.094587  |
| 103 | 1 | -4.957876 | 0.142737  | -1.957898 |
| 104 | 1 | -6.309943 | 0.436317  | -2.630932 |
| 105 | 1 | -5.712591 | -1.682768 | -2.807205 |
| 106 | 1 | -7.055389 | -1.537786 | -2.073625 |
| 107 | 1 | -4.030658 | -2.941804 | 2.038992  |
| 108 | 1 | -2.668596 | -2.739758 | 2.750256  |
| 109 | 1 | -3.897783 | 0.557213  | 3.158962  |
| 110 | 1 | -2.455693 | 1.283032  | 3.106110  |
| 111 | 1 | -2.178219 | -0.561571 | 3.094774  |
| 112 | 1 | -0.710951 | -1.273998 | 3.216888  |
| 113 | 1 | -5.126637 | -0.413964 | 1.791366  |

---

HF = -3873.5989517 Hartree

Zero-point correction = 0.964415

Sum of electronic and thermal free energies = -3872.738392



[Gd(L<sup>2</sup>)(H<sub>2</sub>O)]<sup>3+</sup>·19H<sub>2</sub>O (*tf*)

(0 imaginary frequencies)

| Center Number | Atomic Number | Coordinates (Angstroms) |           |           |
|---------------|---------------|-------------------------|-----------|-----------|
|               |               | x                       | y         | z         |
| 1             | 64            | -0.416193               | -0.134451 | 0.625814  |
| 2             | 7             | -1.000278               | 2.095142  | -0.665668 |
| 3             | 7             | 1.018287                | -2.343323 | 1.030627  |
| 4             | 7             | -1.085651               | -2.523589 | -0.913913 |
| 5             | 7             | 0.078524                | -0.019091 | -2.221927 |
| 6             | 8             | -2.651920               | -0.284844 | 0.066508  |
| 7             | 8             | 1.773218                | 0.423056  | 0.094086  |
| 8             | 15            | -3.563179               | -1.448933 | -0.369743 |
| 9             | 15            | 2.590388                | 0.167028  | -1.173587 |
| 10            | 8             | -4.077619               | -1.197835 | -1.778746 |
| 11            | 8             | -4.663166               | -1.751673 | 0.636960  |
| 12            | 8             | 3.792552                | 1.080794  | -1.370495 |
| 13            | 8             | 2.974222                | -1.306745 | -1.332961 |
| 14            | 6             | -1.261106               | 4.544357  | -1.849978 |
| 15            | 6             | 1.980367                | -4.387377 | 0.341801  |
| 16            | 6             | 0.971528                | -3.424367 | 0.275505  |
| 17            | 6             | -0.127198               | -3.643730 | -0.737326 |
| 18            | 6             | -1.189834               | -2.176602 | -2.364257 |
| 19            | 6             | -2.440514               | -2.881207 | -0.384995 |
| 20            | 6             | 3.095374                | -3.042009 | 1.953259  |
| 21            | 6             | 2.062909                | -2.150515 | 1.848382  |
| 22            | 6             | 2.072520                | -0.893607 | 2.673527  |
| 23            | 6             | 3.047004                | -4.192879 | 1.179376  |
| 24            | 6             | -1.325413               | 4.430073  | -0.472659 |
| 25            | 6             | -1.166002               | 3.179716  | 0.077762  |
| 26            | 6             | -1.164020               | 2.977134  | 1.564290  |
| 27            | 6             | -1.086322               | 3.410829  | -2.621182 |
| 28            | 6             | -1.004310               | 2.179341  | -1.990887 |
| 29            | 6             | -0.967945               | 0.880270  | -2.755687 |
| 30            | 6             | 0.002406                | -1.368637 | -2.841886 |
| 31            | 6             | 1.434403                | 0.568136  | -2.503793 |
| 32            | 1             | -1.327068               | 5.505669  | -2.319677 |
| 33            | 1             | 1.941914                | -5.224459 | -0.322779 |
| 34            | 1             | 0.389289                | -3.834176 | -1.668991 |
| 35            | 1             | -0.669891               | -4.545295 | -0.465361 |
| 36            | 1             | -1.239758               | -3.095768 | -2.949563 |
| 37            | 1             | -2.118938               | -1.659647 | -2.518549 |
| 38            | 1             | -2.349830               | -3.242674 | 0.626521  |
| 39            | 1             | -2.871906               | -3.685887 | -0.983609 |
| 40            | 1             | 3.925191                | -2.812866 | 2.583700  |
| 41            | 1             | 3.849825                | -4.902050 | 1.213018  |
| 42            | 1             | -1.475727               | 5.264250  | 0.177884  |
| 43            | 1             | -0.918844               | 3.477568  | -3.672699 |
| 44            | 1             | -1.934449               | 0.408978  | -2.638659 |
| 45            | 1             | -0.797157               | 1.083804  | -3.810458 |

|    |   |           |           |           |
|----|---|-----------|-----------|-----------|
| 46 | 1 | -0.052916 | -1.265622 | -3.927388 |
| 47 | 1 | 0.917144  | -1.887368 | -2.619951 |
| 48 | 1 | 1.348345  | 1.639663  | -2.579512 |
| 49 | 1 | 1.803763  | 0.198534  | -3.456999 |
| 50 | 8 | 0.966055  | -0.252203 | 2.707536  |
| 51 | 8 | 3.109207  | -0.602184 | 3.284347  |
| 52 | 8 | -1.080697 | 1.752063  | 1.938568  |
| 53 | 8 | -1.203870 | 3.964958  | 2.305062  |
| 54 | 8 | 3.454064  | -1.607435 | -4.039590 |
| 55 | 1 | 3.211018  | -1.487348 | -3.102474 |
| 56 | 1 | 4.344036  | -1.202702 | -4.080686 |
| 57 | 8 | 5.625660  | -0.292715 | -3.144175 |
| 58 | 1 | 5.089388  | 0.385530  | -2.687376 |
| 59 | 1 | 5.865528  | -0.930596 | -2.447413 |
| 60 | 8 | 1.035561  | 2.152324  | 3.895752  |
| 61 | 1 | 1.062937  | 1.287222  | 3.419282  |
| 62 | 8 | 2.795060  | 0.970865  | 5.759933  |
| 63 | 1 | 2.152301  | 1.564226  | 5.335539  |
| 64 | 1 | 3.097980  | 0.389972  | 5.043112  |
| 65 | 1 | 0.107838  | 2.423815  | 3.919380  |
| 66 | 8 | 1.590265  | 4.309474  | 2.397931  |
| 67 | 1 | 0.647516  | 4.532336  | 2.456918  |
| 68 | 1 | 1.694595  | 3.485584  | 2.922620  |
| 69 | 8 | 5.661719  | -0.901536 | 2.170892  |
| 70 | 1 | 5.583681  | -1.400530 | 1.339548  |
| 71 | 1 | 4.783396  | -0.750504 | 2.565885  |
| 72 | 8 | 2.024163  | 4.801077  | -0.145393 |
| 73 | 1 | 2.053410  | 4.556085  | 0.816593  |
| 74 | 1 | 1.098961  | 4.792477  | -0.416360 |
| 75 | 8 | 6.059408  | 0.936277  | 0.124517  |
| 76 | 1 | 5.203471  | 1.200815  | -0.278990 |
| 77 | 1 | 5.930707  | 0.617021  | 1.036639  |
| 78 | 8 | 2.969772  | 3.519990  | -2.288496 |
| 79 | 1 | 2.726632  | 4.031089  | -1.482426 |
| 80 | 1 | 3.390018  | 2.678611  | -2.008610 |
| 81 | 8 | 5.649055  | -1.579913 | -0.640707 |
| 82 | 1 | 5.928984  | -0.650038 | -0.457579 |
| 83 | 1 | 4.683770  | -1.584489 | -0.828887 |
| 84 | 8 | 2.429556  | -3.741402 | -2.609965 |
| 85 | 1 | 2.649959  | -3.088182 | -1.920167 |
| 86 | 1 | 2.770995  | -3.345531 | -3.430853 |
| 87 | 8 | 1.407837  | 3.442765  | -4.392253 |
| 88 | 1 | 1.989286  | 3.566073  | -3.587141 |
| 89 | 1 | 1.781386  | 2.696455  | -4.881291 |
| 90 | 8 | -2.925011 | 0.478854  | 3.566040  |
| 91 | 8 | -5.163311 | 0.445476  | 2.270844  |
| 92 | 8 | -5.597392 | 0.929936  | -1.976133 |
| 93 | 8 | -7.068613 | -0.935726 | -0.364252 |
| 94 | 8 | -1.477243 | -1.303161 | 2.587497  |
| 95 | 8 | -3.387820 | -3.431296 | 2.555466  |

|     |   |           |           |           |
|-----|---|-----------|-----------|-----------|
| 96  | 8 | -6.619161 | -1.412278 | -2.993262 |
| 97  | 8 | -4.233225 | 1.904967  | 0.220248  |
| 98  | 1 | -4.974636 | 1.133129  | 1.591058  |
| 99  | 1 | -4.802525 | 1.863670  | -0.569616 |
| 100 | 1 | -3.546628 | 1.206454  | 0.143188  |
| 101 | 1 | -6.706511 | -0.072117 | -0.624570 |
| 102 | 1 | -6.325580 | -1.403227 | 0.078951  |
| 103 | 1 | -4.898112 | 0.225583  | -1.928436 |
| 104 | 1 | -6.241373 | 0.558098  | -2.601755 |
| 105 | 1 | -5.670221 | -1.569082 | -2.826604 |
| 106 | 1 | -7.014068 | -1.422420 | -2.095570 |
| 107 | 1 | -4.039242 | -2.952550 | 2.010083  |
| 108 | 1 | -2.664719 | -2.799837 | 2.705914  |
| 109 | 1 | -3.856127 | 0.482212  | 3.195776  |
| 110 | 1 | -2.403966 | 1.183598  | 3.143571  |
| 111 | 1 | -2.141822 | -0.646005 | 3.030827  |
| 112 | 1 | -0.672832 | -1.339138 | 3.123769  |
| 113 | 1 | -5.106063 | -0.417994 | 1.811644  |

---

HF = -3876.0097146 Hartree

Zero-point correction = 0.964780

Sum of electronic and thermal free energies = -3875.148507

[Ho(L<sup>2</sup>)(H<sub>2</sub>O)]<sup>3+</sup>·19H<sub>2</sub>O (tf)

(0 imaginary frequencies)

| Center<br>Number | Atomic<br>Number | Coordinates (Angstroms) |           |           |
|------------------|------------------|-------------------------|-----------|-----------|
|                  |                  | x                       | y         | z         |
| 1                | 67               | -0.415403               | -0.156517 | 0.629282  |
| 2                | 7                | -0.991290               | 2.062929  | -0.635108 |
| 3                | 7                | 1.009529                | -2.346138 | 0.990525  |
| 4                | 7                | -1.097426               | -2.526484 | -0.950063 |
| 5                | 7                | 0.056178                | -0.023531 | -2.238373 |
| 6                | 8                | -2.612296               | -0.286548 | 0.083081  |
| 7                | 8                | 1.718851                | 0.420109  | 0.080781  |
| 8                | 15               | -3.546565               | -1.422245 | -0.379445 |
| 9                | 15               | 2.551298                | 0.177361  | -1.180752 |
| 10               | 8                | -4.051852               | -1.128717 | -1.783460 |
| 11               | 8                | -4.655660               | -1.723321 | 0.617703  |
| 12               | 8                | 3.752451                | 1.096987  | -1.354687 |
| 13               | 8                | 2.943335                | -1.293597 | -1.344233 |
| 14               | 6                | -1.254561               | 4.531562  | -1.780153 |
| 15               | 6                | 1.959218                | -4.398154 | 0.305403  |
| 16               | 6                | 0.956565                | -3.428475 | 0.237385  |
| 17               | 6                | -0.141689               | -3.646168 | -0.775204 |
| 18               | 6                | -1.204422               | -2.178928 | -2.399270 |
| 19               | 6                | -2.451898               | -2.873671 | -0.417789 |
| 20               | 6                | 3.081034                | -3.060541 | 1.916822  |
| 21               | 6                | 2.054735                | -2.162334 | 1.810234  |
| 22               | 6                | 2.068044                | -0.911285 | 2.642940  |
| 23               | 6                | 3.026874                | -4.210944 | 1.142864  |
| 24               | 6                | -1.294430               | 4.398086  | -0.403525 |
| 25               | 6                | -1.136360               | 3.138542  | 0.125336  |
| 26               | 6                | -1.121081               | 2.907685  | 1.606060  |
| 27               | 6                | -1.104111               | 3.407295  | -2.569563 |
| 28               | 6                | -1.019481               | 2.166072  | -1.958516 |
| 29               | 6                | -1.001924               | 0.878170  | -2.741474 |
| 30               | 6                | -0.017705               | -1.363332 | -2.875124 |
| 31               | 6                | 1.406882                | 0.575042  | -2.519889 |
| 32               | 1                | -1.321788               | 5.499783  | -2.235236 |
| 33               | 1                | 1.914440                | -5.236088 | -0.357645 |
| 34               | 1                | 0.375956                | -3.834476 | -1.706672 |
| 35               | 1                | -0.683798               | -4.548931 | -0.505302 |
| 36               | 1                | -1.250406               | -3.097476 | -2.986267 |
| 37               | 1                | -2.135766               | -1.665077 | -2.550841 |
| 38               | 1                | -2.361354               | -3.246561 | 0.589373  |
| 39               | 1                | -2.899124               | -3.665548 | -1.021982 |
| 40               | 1                | 3.910208                | -2.836976 | 2.549994  |
| 41               | 1                | 3.824611                | -4.925739 | 1.177765  |
| 42               | 1                | -1.427767               | 5.224276  | 0.260833  |
| 43               | 1                | -0.958865               | 3.487803  | -3.623328 |
| 44               | 1                | -1.966030               | 0.404855  | -2.612075 |
| 45               | 1                | -0.851822               | 1.096551  | -3.796751 |

|    |   |           |           |           |
|----|---|-----------|-----------|-----------|
| 46 | 1 | -0.079910 | -1.248103 | -3.959389 |
| 47 | 1 | 0.900071  | -1.881929 | -2.664776 |
| 48 | 1 | 1.313437  | 1.645683  | -2.602094 |
| 49 | 1 | 1.784435  | 0.203315  | -3.468810 |
| 50 | 8 | 0.966272  | -0.263774 | 2.671942  |
| 51 | 8 | 3.101963  | -0.634274 | 3.265674  |
| 52 | 8 | -1.051898 | 1.674068  | 1.951884  |
| 53 | 8 | -1.141073 | 3.878356  | 2.370947  |
| 54 | 8 | 3.434833  | -1.585061 | -4.047806 |
| 55 | 1 | 3.189095  | -1.469073 | -3.110600 |
| 56 | 1 | 4.320768  | -1.171568 | -4.087438 |
| 57 | 8 | 5.595090  | -0.257386 | -3.146372 |
| 58 | 1 | 5.058074  | 0.416554  | -2.684648 |
| 59 | 1 | 5.834472  | -0.901260 | -2.454821 |
| 60 | 8 | 1.096003  | 2.149309  | 3.850604  |
| 61 | 1 | 1.087356  | 1.282041  | 3.377748  |
| 62 | 8 | 2.852395  | 0.974074  | 5.719364  |
| 63 | 1 | 2.216980  | 1.569989  | 5.287072  |
| 64 | 1 | 3.131705  | 0.369781  | 5.012362  |
| 65 | 1 | 0.177707  | 2.447284  | 3.905234  |
| 66 | 8 | 1.634614  | 4.324255  | 2.375160  |
| 67 | 1 | 0.687595  | 4.523832  | 2.447013  |
| 68 | 1 | 1.756016  | 3.488678  | 2.876796  |
| 69 | 8 | 5.654702  | -0.925277 | 2.156306  |
| 70 | 1 | 5.574604  | -1.414022 | 1.318935  |
| 71 | 1 | 4.776660  | -0.777989 | 2.553572  |
| 72 | 8 | 2.049795  | 4.885620  | -0.157657 |
| 73 | 1 | 2.085185  | 4.622366  | 0.799478  |
| 74 | 1 | 1.128004  | 4.823399  | -0.435047 |
| 75 | 8 | 6.027918  | 0.939924  | 0.127432  |
| 76 | 1 | 5.168384  | 1.206162  | -0.267140 |
| 77 | 1 | 5.907666  | 0.610945  | 1.037192  |
| 78 | 8 | 2.972739  | 3.545135  | -2.280654 |
| 79 | 1 | 2.748762  | 4.077069  | -1.483264 |
| 80 | 1 | 3.370175  | 2.695632  | -1.991669 |
| 81 | 8 | 5.619502  | -1.568730 | -0.659196 |
| 82 | 1 | 5.897744  | -0.639916 | -0.468209 |
| 83 | 1 | 4.653083  | -1.573856 | -0.842650 |
| 84 | 8 | 2.421018  | -3.730119 | -2.635087 |
| 85 | 1 | 2.628938  | -3.078993 | -1.939566 |
| 86 | 1 | 2.765762  | -3.326088 | -3.450672 |
| 87 | 8 | 1.380046  | 3.474266  | -4.358114 |
| 88 | 1 | 1.973805  | 3.592333  | -3.560847 |
| 89 | 1 | 1.753036  | 2.738987  | -4.864025 |
| 90 | 8 | -2.889849 | 0.387383  | 3.584228  |
| 91 | 8 | -5.135061 | 0.428123  | 2.309405  |
| 92 | 8 | -5.529794 | 1.035693  | -1.952608 |
| 93 | 8 | -7.038467 | -0.831078 | -0.369614 |
| 94 | 8 | -1.453461 | -1.353084 | 2.520350  |
| 95 | 8 | -3.428304 | -3.456239 | 2.512158  |

|     |   |           |           |           |
|-----|---|-----------|-----------|-----------|
| 96  | 8 | -6.596667 | -1.268082 | -3.003822 |
| 97  | 8 | -4.175251 | 1.905988  | 0.300465  |
| 98  | 1 | -4.933296 | 1.129132  | 1.646133  |
| 99  | 1 | -4.730621 | 1.905829  | -0.499861 |
| 100 | 1 | -3.494625 | 1.203650  | 0.207842  |
| 101 | 1 | -6.658237 | 0.029941  | -0.611683 |
| 102 | 1 | -6.306144 | -1.323123 | 0.064811  |
| 103 | 1 | -4.837897 | 0.324677  | -1.916546 |
| 104 | 1 | -6.181770 | 0.673957  | -2.576333 |
| 105 | 1 | -5.651373 | -1.447487 | -2.838634 |
| 106 | 1 | -6.993467 | -1.287573 | -2.106974 |
| 107 | 1 | -4.062953 | -2.953442 | 1.968137  |
| 108 | 1 | -2.686860 | -2.848992 | 2.668245  |
| 109 | 1 | -3.823428 | 0.415918  | 3.218816  |
| 110 | 1 | -2.365387 | 1.108084  | 3.195016  |
| 111 | 1 | -2.115113 | -0.708989 | 2.989369  |
| 112 | 1 | -0.655783 | -1.417200 | 3.062568  |
| 113 | 1 | -5.088381 | -0.423380 | 1.827097  |

---

HF = -3877.7711703 Hartree

Zero-point correction = 0.964938

Sum of electronic and thermal free energies = -3876.909730

[Lu(L<sup>2</sup>)(H<sub>2</sub>O)]<sup>3+</sup>·19H<sub>2</sub>O (tf)

(0 imaginary frequencies)

| Center<br>Number | Atomic<br>Number | Coordinates (Angstroms) |           |           |
|------------------|------------------|-------------------------|-----------|-----------|
|                  |                  | x                       | y         | z         |
| 1                | 71               | -0.413596               | -0.147515 | 0.635996  |
| 2                | 7                | -0.977543               | 2.014448  | -0.679684 |
| 3                | 7                | 0.999319                | -2.314657 | 1.006614  |
| 4                | 7                | -1.103775               | -2.560524 | -0.928058 |
| 5                | 7                | 0.045877                | -0.093404 | -2.265054 |
| 6                | 8                | -2.560256               | -0.287267 | 0.095505  |
| 7                | 8                | 1.661733                | 0.404994  | 0.055648  |
| 8                | 15               | -3.518962               | -1.408290 | -0.353864 |
| 9                | 15               | 2.518836                | 0.147913  | -1.188182 |
| 10               | 8                | -4.024055               | -1.114459 | -1.758439 |
| 11               | 8                | -4.631782               | -1.677308 | 0.648684  |
| 12               | 8                | 3.713304                | 1.077774  | -1.353008 |
| 13               | 8                | 2.931308                | -1.320733 | -1.315778 |
| 14               | 6                | -1.253215               | 4.465995  | -1.862039 |
| 15               | 6                | 1.946915                | -4.389277 | 0.385662  |
| 16               | 6                | 0.945810                | -3.420161 | 0.287501  |
| 17               | 6                | -0.149656               | -3.671326 | -0.719694 |
| 18               | 6                | -1.210730               | -2.249688 | -2.383655 |
| 19               | 6                | -2.456212               | -2.880714 | -0.381770 |
| 20               | 6                | 3.072890                | -3.004974 | 1.951706  |
| 21               | 6                | 2.047121                | -2.109914 | 1.819017  |
| 22               | 6                | 2.060197                | -0.838663 | 2.618064  |
| 23               | 6                | 3.016324                | -4.178959 | 1.214561  |
| 24               | 6                | -1.276505               | 4.354809  | -0.483139 |
| 25               | 6                | -1.114349               | 3.103494  | 0.062968  |
| 26               | 6                | -1.095808               | 2.890709  | 1.544380  |
| 27               | 6                | -1.116010               | 3.328125  | -2.633583 |
| 28               | 6                | -1.023966               | 2.096457  | -2.004068 |
| 29               | 6                | -1.018575               | 0.797561  | -2.767952 |
| 30               | 6                | -0.026249               | -1.442025 | -2.877722 |
| 31               | 6                | 1.393667                | 0.505361  | -2.553075 |
| 32               | 1                | -1.325306               | 5.426483  | -2.332457 |
| 33               | 1                | 1.898366                | -5.248101 | -0.249910 |
| 34               | 1                | 0.371059                | -3.885506 | -1.643938 |
| 35               | 1                | -0.689046               | -4.568048 | -0.424397 |
| 36               | 1                | -1.254818               | -3.181864 | -2.949484 |
| 37               | 1                | -2.142176               | -1.739472 | -2.546797 |
| 38               | 1                | -2.364494               | -3.240099 | 0.629963  |
| 39               | 1                | -2.923075               | -3.673209 | -0.970462 |
| 40               | 1                | 3.903688                | -2.762425 | 2.575678  |
| 41               | 1                | 3.812676                | -4.893940 | 1.270888  |
| 42               | 1                | -1.403965               | 5.191443  | 0.169332  |
| 43               | 1                | -0.989096               | 3.390865  | -3.690806 |
| 44               | 1                | -1.980725               | 0.326694  | -2.617441 |
| 45               | 1                | -0.884309               | 1.001109  | -3.828744 |

|    |   |           |           |           |
|----|---|-----------|-----------|-----------|
| 46 | 1 | -0.091224 | -1.347844 | -3.964259 |
| 47 | 1 | 0.892390  | -1.956217 | -2.659524 |
| 48 | 1 | 1.294922  | 1.572457  | -2.670407 |
| 49 | 1 | 1.785244  | 0.106706  | -3.485018 |
| 50 | 8 | 0.953282  | -0.199808 | 2.638886  |
| 51 | 8 | 3.095030  | -0.538176 | 3.227933  |
| 52 | 8 | -1.028797 | 1.660007  | 1.900966  |
| 53 | 8 | -1.115515 | 3.866524  | 2.302768  |
| 54 | 8 | 3.446086  | -1.666825 | -4.008619 |
| 55 | 1 | 3.196179  | -1.534762 | -3.074497 |
| 56 | 1 | 4.323958  | -1.237730 | -4.056916 |
| 57 | 8 | 5.581019  | -0.283931 | -3.131078 |
| 58 | 1 | 5.037724  | 0.393281  | -2.682496 |
| 59 | 1 | 5.823440  | -0.914305 | -2.427998 |
| 60 | 8 | 1.100243  | 2.225769  | 3.796070  |
| 61 | 1 | 1.081054  | 1.352177  | 3.335448  |
| 62 | 8 | 2.864797  | 1.087342  | 5.673032  |
| 63 | 1 | 2.223666  | 1.673915  | 5.236104  |
| 64 | 1 | 3.142948  | 0.476159  | 4.971649  |
| 65 | 1 | 0.186877  | 2.539550  | 3.844779  |
| 66 | 8 | 1.644801  | 4.376364  | 2.288846  |
| 67 | 1 | 0.694425  | 4.561937  | 2.353037  |
| 68 | 1 | 1.772760  | 3.548133  | 2.800732  |
| 69 | 8 | 5.657077  | -0.889185 | 2.177634  |
| 70 | 1 | 5.583454  | -1.381021 | 1.341323  |
| 71 | 1 | 4.773824  | -0.724354 | 2.556581  |
| 72 | 8 | 2.056138  | 4.922788  | -0.248641 |
| 73 | 1 | 2.093085  | 4.668647  | 0.710822  |
| 74 | 1 | 1.138141  | 4.829274  | -0.530612 |
| 75 | 8 | 5.992539  | 0.965871  | 0.122239  |
| 76 | 1 | 5.126498  | 1.215735  | -0.269556 |
| 77 | 1 | 5.884754  | 0.650006  | 1.037705  |
| 78 | 8 | 2.969159  | 3.510603  | -2.333529 |
| 79 | 1 | 2.755773  | 4.070767  | -1.553543 |
| 80 | 1 | 3.347140  | 2.660964  | -2.018911 |
| 81 | 8 | 5.610431  | -1.555398 | -0.629356 |
| 82 | 1 | 5.877660  | -0.620564 | -0.451778 |
| 83 | 1 | 4.643460  | -1.574502 | -0.810040 |
| 84 | 8 | 2.425161  | -3.787081 | -2.566254 |
| 85 | 1 | 2.623025  | -3.122391 | -1.880811 |
| 86 | 1 | 2.777089  | -3.397480 | -3.385690 |
| 87 | 8 | 1.376971  | 3.390614  | -4.405576 |
| 88 | 1 | 1.968591  | 3.527156  | -3.609361 |
| 89 | 1 | 1.763581  | 2.657445  | -4.904337 |
| 90 | 8 | -2.856489 | 0.421802  | 3.577380  |
| 91 | 8 | -5.111270 | 0.480803  | 2.320739  |
| 92 | 8 | -5.492311 | 1.052440  | -1.941828 |
| 93 | 8 | -7.012136 | -0.792645 | -0.355522 |
| 94 | 8 | -1.429536 | -1.316122 | 2.494076  |
| 95 | 8 | -3.434273 | -3.407391 | 2.560840  |



|     |   |           |           |           |
|-----|---|-----------|-----------|-----------|
| 96  | 8 | -6.567207 | -1.252463 | -2.986642 |
| 97  | 8 | -4.121688 | 1.920463  | 0.298859  |
| 98  | 1 | -4.897781 | 1.173157  | 1.652285  |
| 99  | 1 | -4.675594 | 1.921547  | -0.502540 |
| 100 | 1 | -3.444525 | 1.215088  | 0.211308  |
| 101 | 1 | -6.627728 | 0.064316  | -0.605860 |
| 102 | 1 | -6.282600 | -1.282030 | 0.086063  |
| 103 | 1 | -4.807211 | 0.334498  | -1.900994 |
| 104 | 1 | -6.143220 | 0.698844  | -2.570989 |
| 105 | 1 | -5.623109 | -1.435368 | -2.819610 |
| 106 | 1 | -6.964632 | -1.262689 | -2.089962 |
| 107 | 1 | -4.061604 | -2.902478 | 2.010129  |
| 108 | 1 | -2.680815 | -2.811773 | 2.699995  |
| 109 | 1 | -3.793651 | 0.458675  | 3.222769  |
| 110 | 1 | -2.330280 | 1.136505  | 3.180099  |
| 111 | 1 | -2.091401 | -0.674508 | 2.964940  |
| 112 | 1 | -0.636603 | -1.381866 | 3.042587  |
| 113 | 1 | -5.068441 | -0.374576 | 1.844472  |

---

HF = -3880.0752164 Hartree

Zero-point correction = 0.965096

Sum of electronic and thermal free energies = -3879.213582

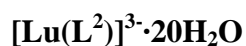

(0 imaginary frequencies)

| Center<br>Number | Atomic<br>Number | Coordinates (Angstroms) |           |           |
|------------------|------------------|-------------------------|-----------|-----------|
|                  |                  | x                       | y         | z         |
| 1                | 71               | -0.413596               | -0.147515 | 0.635996  |
| 2                | 7                | -0.977543               | 2.014448  | -0.679684 |
| 3                | 7                | 0.999319                | -2.314657 | 1.006614  |
| 4                | 7                | -1.103775               | -2.560524 | -0.928058 |
| 5                | 7                | 0.045877                | -0.093404 | -2.265054 |
| 6                | 8                | -2.560256               | -0.287267 | 0.095505  |
| 7                | 8                | 1.661733                | 0.404994  | 0.055648  |
| 8                | 15               | -3.518962               | -1.408290 | -0.353864 |
| 9                | 15               | 2.518836                | 0.147913  | -1.188182 |
| 10               | 8                | -4.024055               | -1.114459 | -1.758439 |
| 11               | 8                | -4.631782               | -1.677308 | 0.648684  |
| 12               | 8                | 3.713304                | 1.077774  | -1.353008 |
| 13               | 8                | 2.931308                | -1.320733 | -1.315778 |
| 14               | 6                | -1.253215               | 4.465995  | -1.862039 |
| 15               | 6                | 1.946915                | -4.389277 | 0.385662  |
| 16               | 6                | 0.945810                | -3.420161 | 0.287501  |
| 17               | 6                | -0.149656               | -3.671326 | -0.719694 |
| 18               | 6                | -1.210730               | -2.249688 | -2.383655 |
| 19               | 6                | -2.456212               | -2.880714 | -0.381770 |
| 20               | 6                | 3.072890                | -3.004974 | 1.951706  |
| 21               | 6                | 2.047121                | -2.109914 | 1.819017  |
| 22               | 6                | 2.060197                | -0.838663 | 2.618064  |
| 23               | 6                | 3.016324                | -4.178959 | 1.214561  |
| 24               | 6                | -1.276505               | 4.354809  | -0.483139 |
| 25               | 6                | -1.114349               | 3.103494  | 0.062968  |
| 26               | 6                | -1.095808               | 2.890709  | 1.544380  |
| 27               | 6                | -1.116010               | 3.328125  | -2.633583 |
| 28               | 6                | -1.023966               | 2.096457  | -2.004068 |
| 29               | 6                | -1.018575               | 0.797561  | -2.767952 |
| 30               | 6                | -0.026249               | -1.442025 | -2.877722 |
| 31               | 6                | 1.393667                | 0.505361  | -2.553075 |
| 32               | 1                | -1.325306               | 5.426483  | -2.332457 |
| 33               | 1                | 1.898366                | -5.248101 | -0.249910 |
| 34               | 1                | 0.371059                | -3.885506 | -1.643938 |
| 35               | 1                | -0.689046               | -4.568048 | -0.424397 |
| 36               | 1                | -1.254818               | -3.181864 | -2.949484 |
| 37               | 1                | -2.142176               | -1.739472 | -2.546797 |
| 38               | 1                | -2.364494               | -3.240099 | 0.629963  |
| 39               | 1                | -2.923075               | -3.673209 | -0.970462 |
| 40               | 1                | 3.903688                | -2.762425 | 2.575678  |
| 41               | 1                | 3.812676                | -4.893940 | 1.270888  |
| 42               | 1                | -1.403965               | 5.191443  | 0.169332  |
| 43               | 1                | -0.989096               | 3.390865  | -3.690806 |
| 44               | 1                | -1.980725               | 0.326694  | -2.617441 |
| 45               | 1                | -0.884309               | 1.001109  | -3.828744 |

|    |   |           |           |           |
|----|---|-----------|-----------|-----------|
| 46 | 1 | -0.091224 | -1.347844 | -3.964259 |
| 47 | 1 | 0.892390  | -1.956217 | -2.659524 |
| 48 | 1 | 1.294922  | 1.572457  | -2.670407 |
| 49 | 1 | 1.785244  | 0.106706  | -3.485018 |
| 50 | 8 | 0.953282  | -0.199808 | 2.638886  |
| 51 | 8 | 3.095030  | -0.538176 | 3.227933  |
| 52 | 8 | -1.028797 | 1.660007  | 1.900966  |
| 53 | 8 | -1.115515 | 3.866524  | 2.302768  |
| 54 | 8 | 3.446086  | -1.666825 | -4.008619 |
| 55 | 1 | 3.196179  | -1.534762 | -3.074497 |
| 56 | 1 | 4.323958  | -1.237730 | -4.056916 |
| 57 | 8 | 5.581019  | -0.283931 | -3.131078 |
| 58 | 1 | 5.037724  | 0.393281  | -2.682496 |
| 59 | 1 | 5.823440  | -0.914305 | -2.427998 |
| 60 | 8 | 1.100243  | 2.225769  | 3.796070  |
| 61 | 1 | 1.081054  | 1.352177  | 3.335448  |
| 62 | 8 | 2.864797  | 1.087342  | 5.673032  |
| 63 | 1 | 2.223666  | 1.673915  | 5.236104  |
| 64 | 1 | 3.142948  | 0.476159  | 4.971649  |
| 65 | 1 | 0.186877  | 2.539550  | 3.844779  |
| 66 | 8 | 1.644801  | 4.376364  | 2.288846  |
| 67 | 1 | 0.694425  | 4.561937  | 2.353037  |
| 68 | 1 | 1.772760  | 3.548133  | 2.800732  |
| 69 | 8 | 5.657077  | -0.889185 | 2.177634  |
| 70 | 1 | 5.583454  | -1.381021 | 1.341323  |
| 71 | 1 | 4.773824  | -0.724354 | 2.556581  |
| 72 | 8 | 2.056138  | 4.922788  | -0.248641 |
| 73 | 1 | 2.093085  | 4.668647  | 0.710822  |
| 74 | 1 | 1.138141  | 4.829274  | -0.530612 |
| 75 | 8 | 5.992539  | 0.965871  | 0.122239  |
| 76 | 1 | 5.126498  | 1.215735  | -0.269556 |
| 77 | 1 | 5.884754  | 0.650006  | 1.037705  |
| 78 | 8 | 2.969159  | 3.510603  | -2.333529 |
| 79 | 1 | 2.755773  | 4.070767  | -1.553543 |
| 80 | 1 | 3.347140  | 2.660964  | -2.018911 |
| 81 | 8 | 5.610431  | -1.555398 | -0.629356 |
| 82 | 1 | 5.877660  | -0.620564 | -0.451778 |
| 83 | 1 | 4.643460  | -1.574502 | -0.810040 |
| 84 | 8 | 2.425161  | -3.787081 | -2.566254 |
| 85 | 1 | 2.623025  | -3.122391 | -1.880811 |
| 86 | 1 | 2.777089  | -3.397480 | -3.385690 |
| 87 | 8 | 1.376971  | 3.390614  | -4.405576 |
| 88 | 1 | 1.968591  | 3.527156  | -3.609361 |
| 89 | 1 | 1.763581  | 2.657445  | -4.904337 |
| 90 | 8 | -2.856489 | 0.421802  | 3.577380  |
| 91 | 8 | -5.111270 | 0.480803  | 2.320739  |
| 92 | 8 | -5.492311 | 1.052440  | -1.941828 |
| 93 | 8 | -7.012136 | -0.792645 | -0.355522 |
| 94 | 8 | -1.429536 | -1.316122 | 2.494076  |
| 95 | 8 | -3.434273 | -3.407391 | 2.560840  |

|     |   |           |           |           |
|-----|---|-----------|-----------|-----------|
| 96  | 8 | -6.567207 | -1.252463 | -2.986642 |
| 97  | 8 | -4.121688 | 1.920463  | 0.298859  |
| 98  | 1 | -4.897781 | 1.173157  | 1.652285  |
| 99  | 1 | -4.675594 | 1.921547  | -0.502540 |
| 100 | 1 | -3.444525 | 1.215088  | 0.211308  |
| 101 | 1 | -6.627728 | 0.064316  | -0.605860 |
| 102 | 1 | -6.282600 | -1.282030 | 0.086063  |
| 103 | 1 | -4.807211 | 0.334498  | -1.900994 |
| 104 | 1 | -6.143220 | 0.698844  | -2.570989 |
| 105 | 1 | -5.623109 | -1.435368 | -2.819610 |
| 106 | 1 | -6.964632 | -1.262689 | -2.089962 |
| 107 | 1 | -4.061604 | -2.902478 | 2.010129  |
| 108 | 1 | -2.680815 | -2.811773 | 2.699995  |
| 109 | 1 | -3.793651 | 0.458675  | 3.222769  |
| 110 | 1 | -2.330280 | 1.136505  | 3.180099  |
| 111 | 1 | -2.091401 | -0.674508 | 2.964940  |
| 112 | 1 | -0.636603 | -1.381866 | 3.042587  |
| 113 | 1 | -5.068441 | -0.374576 | 1.844472  |

---

HF = -3880.0743266 Hartree

Zero-point correction = 0.964286

Sum of electronic and thermal free energies = -3879.217203

| Center<br>Number | Atomic<br>Number | Coordinates (Angstroms) |           |           |
|------------------|------------------|-------------------------|-----------|-----------|
|                  |                  | x                       | y         | z         |
| 1                | 57               | 0.179230                | -0.812915 | 0.314372  |
| 2                | 7                | 0.447287                | -1.258511 | -2.357532 |
| 3                | 7                | -0.587419               | 0.473225  | 2.688579  |
| 4                | 7                | 1.238974                | 1.987731  | 0.996361  |
| 5                | 7                | -0.220594               | 1.528533  | -1.638866 |
| 6                | 8                | 2.507783                | -0.428831 | -0.164564 |
| 7                | 8                | -2.112983               | -0.464986 | -0.393791 |
| 8                | 15               | 3.549051                | 0.585594  | 0.341745  |
| 9                | 15               | -2.764076               | 0.841142  | -0.857561 |
| 10               | 8                | 4.056887                | 1.430784  | -0.808778 |
| 11               | 8                | 4.647242                | -0.078813 | 1.163497  |
| 12               | 8                | -4.118057               | 0.625331  | -1.521933 |
| 13               | 8                | -2.826157               | 1.884185  | 0.257460  |
| 14               | 6                | 0.334112                | -1.815875 | -5.032251 |
| 15               | 6                | -0.607645               | 2.222446  | 4.277629  |
| 16               | 6                | -0.241997               | 1.706499  | 3.033958  |
| 17               | 6                | 0.457564                | 2.630855  | 2.072234  |
| 18               | 6                | 1.361663                | 2.903347  | -0.198759 |
| 19               | 6                | 2.582957                | 1.580679  | 1.521375  |
| 20               | 6                | -1.735156               | 0.185510  | 4.751296  |
| 21               | 6                | -1.327806               | -0.265804 | 3.521511  |
| 22               | 6                | -1.724863               | -1.653113 | 3.086918  |
| 23               | 6                | -1.359129               | 1.460093  | 5.139531  |
| 24               | 6                | 0.305917                | -2.840745 | -4.110561 |
| 25               | 6                | 0.345236                | -2.512587 | -2.775918 |
| 26               | 6                | 0.214948                | -3.581455 | -1.731936 |
| 27               | 6                | 0.430345                | -0.509992 | -4.591436 |
| 28               | 6                | 0.513601                | -0.260497 | -3.232828 |
| 29               | 6                | 0.731692                | 1.141619  | -2.714891 |
| 30               | 6                | 0.085082                | 2.890712  | -1.063700 |
| 31               | 6                | -1.649051               | 1.485245  | -2.127644 |
| 32               | 1                | 0.253904                | -2.021898 | -6.080994 |
| 33               | 1                | -0.310737               | 3.217993  | 4.534751  |
| 34               | 1                | -0.318233               | 3.248025  | 1.645086  |
| 35               | 1                | 1.095924                | 3.285858  | 2.660108  |
| 36               | 1                | 2.419993                | 0.970479  | 2.397290  |
| 37               | 1                | 3.152197                | 2.439297  | 1.868035  |
| 38               | 1                | -2.324352               | -0.462891 | 5.360214  |
| 39               | 1                | -1.653666               | 1.849486  | 6.093952  |
| 40               | 1                | 0.216604                | -3.869531 | -4.380081 |
| 41               | 1                | 0.369625                | 0.303992  | -5.278294 |
| 42               | 1                | 1.735316                | 1.193035  | -2.314658 |
| 43               | 1                | 0.659699                | 1.811139  | -3.562820 |
| 44               | 1                | -1.705198               | 0.864193  | -3.009017 |
| 45               | 1                | -1.984404               | 2.473497  | -2.422288 |

|    |   |           |           |           |
|----|---|-----------|-----------|-----------|
| 46 | 8 | -1.308344 | -2.026619 | 1.953694  |
| 47 | 8 | -2.419490 | -2.318753 | 3.876262  |
| 48 | 8 | 0.239860  | -3.161018 | -0.513991 |
| 49 | 8 | 0.054817  | -4.749447 | -2.093881 |
| 50 | 8 | -3.555965 | 4.219638  | -1.104146 |
| 51 | 1 | -3.182700 | 3.408538  | -0.719778 |
| 52 | 1 | -4.514292 | 4.014383  | -1.129554 |
| 53 | 8 | -5.818329 | 2.769223  | -0.871082 |
| 54 | 1 | -5.361836 | 2.010815  | -1.294582 |
| 55 | 1 | -5.815485 | 2.564708  | 0.081211  |
| 56 | 8 | -1.121578 | -4.596360 | 1.254460  |
| 57 | 1 | -1.545657 | -3.753797 | 1.523883  |
| 58 | 8 | 0.206314  | -4.065996 | 3.516584  |
| 59 | 1 | -0.200574 | -4.493810 | 2.727700  |
| 60 | 1 | -0.524228 | -3.697655 | 4.034701  |
| 61 | 1 | -0.453573 | -4.289346 | 0.593712  |
| 62 | 8 | -2.472642 | -5.308897 | -1.031603 |
| 63 | 1 | -1.647754 | -5.372427 | -1.548321 |
| 64 | 1 | -2.190517 | -5.218806 | -0.099641 |
| 65 | 8 | -4.897442 | -1.272495 | 2.559723  |
| 66 | 1 | -4.847020 | -0.301743 | 2.584217  |
| 67 | 1 | -4.172897 | -1.683019 | 3.052599  |
| 68 | 8 | -2.654344 | -2.730039 | -1.903531 |
| 69 | 1 | -2.765398 | -3.642715 | -1.563034 |
| 70 | 1 | -2.559525 | -2.064286 | -1.198414 |
| 71 | 8 | -5.921314 | -0.661942 | 0.118768  |
| 72 | 1 | -5.276372 | -0.425940 | -0.578845 |
| 73 | 1 | -5.509992 | -1.222470 | 0.803627  |
| 74 | 8 | -3.581999 | -0.998855 | -3.684475 |
| 75 | 1 | -3.230960 | -1.784407 | -3.201941 |
| 76 | 1 | -3.960562 | -0.403852 | -3.005498 |
| 77 | 8 | -5.227793 | 1.441944  | 1.600497  |
| 78 | 1 | -5.634982 | 0.734624  | 1.043188  |
| 79 | 1 | -4.331001 | 1.628005  | 1.247850  |
| 80 | 8 | -2.053220 | 4.335313  | 1.207275  |
| 81 | 1 | -2.333647 | 3.400996  | 1.139618  |
| 82 | 1 | -2.530263 | 4.772445  | 0.480748  |
| 83 | 8 | -2.325736 | 0.569049  | -5.358145 |
| 84 | 1 | -2.746106 | -0.142103 | -4.797030 |
| 85 | 1 | -2.824998 | 1.377885  | -5.175232 |
| 86 | 8 | 1.578725  | -2.092036 | 2.173035  |
| 87 | 8 | 3.908788  | -2.698498 | 1.260941  |
| 88 | 8 | 5.166895  | -0.329622 | -2.579484 |
| 89 | 8 | 6.889878  | -0.499986 | -0.277493 |
| 90 | 8 | 2.269413  | -0.504136 | 4.260203  |
| 91 | 8 | 4.677761  | 0.938938  | 3.811140  |
| 92 | 8 | 6.685316  | 1.757726  | -1.754628 |
| 93 | 8 | 3.669837  | -2.453563 | -1.451388 |
| 94 | 1 | 3.896632  | -2.871182 | 0.295049  |
| 95 | 1 | 4.331273  | -2.026818 | -2.022027 |

|     |   |           |           |           |
|-----|---|-----------|-----------|-----------|
| 96  | 1 | 3.111873  | -1.733612 | -1.085729 |
| 97  | 1 | 6.385035  | -0.841484 | -1.033652 |
| 98  | 1 | 6.211814  | -0.326578 | 0.416724  |
| 99  | 1 | 4.539502  | 0.220034  | -2.061456 |
| 100 | 1 | 5.909297  | 0.287414  | -2.723412 |
| 101 | 1 | 5.785171  | 1.953814  | -1.424391 |
| 102 | 1 | 7.023808  | 1.075195  | -1.136371 |
| 103 | 1 | 4.869781  | 0.602347  | 2.917444  |
| 104 | 1 | 3.917092  | 0.422447  | 4.130385  |
| 105 | 1 | 2.470389  | -2.408804 | 1.798590  |
| 106 | 1 | 1.111702  | -2.816201 | 2.656049  |
| 107 | 1 | 2.065326  | -1.095989 | 3.500506  |
| 108 | 1 | 1.505468  | 0.059005  | 4.420660  |
| 109 | 1 | 4.329175  | -1.816708 | 1.373768  |
| 110 | 6 | 1.719907  | 4.348616  | 0.255582  |
| 111 | 6 | 0.197952  | 3.960557  | -2.186689 |
| 112 | 6 | 0.472504  | 5.365155  | -1.633828 |
| 113 | 6 | 1.824791  | 5.339145  | -0.911397 |
| 114 | 1 | 2.655601  | 4.313130  | 0.801120  |
| 115 | 1 | 0.953629  | 4.728516  | 0.917323  |
| 116 | 1 | 2.605380  | 5.031960  | -1.601300 |
| 117 | 1 | 2.084884  | 6.323501  | -0.530064 |
| 118 | 1 | -0.311935 | 5.643991  | -0.937886 |
| 119 | 1 | 0.476141  | 6.085917  | -2.447423 |
| 120 | 1 | 1.015289  | 3.708958  | -2.852145 |
| 121 | 1 | -0.714629 | 3.967724  | -2.766379 |
| 122 | 1 | -0.758784 | 3.141264  | -0.444342 |
| 123 | 1 | 2.197542  | 2.539331  | -0.769480 |

---

HF = -4025.8125052 Hartree

Zero-point correction = 1.065526

Sum of electronic and thermal free energies = -4024.856161

| Center<br>Number | Atomic<br>Number | Coordinates (Angstroms) |           |           |
|------------------|------------------|-------------------------|-----------|-----------|
|                  |                  | x                       | y         | z         |
| 1                | 60               | 0.170508                | -0.829666 | 0.268029  |
| 2                | 7                | 0.494383                | -1.075604 | -2.383346 |
| 3                | 7                | -0.622340               | 0.305551  | 2.668332  |
| 4                | 7                | 1.221198                | 1.952864  | 1.131241  |
| 5                | 7                | -0.192555               | 1.663947  | -1.531370 |
| 6                | 8                | 2.447725                | -0.423551 | -0.129511 |
| 7                | 8                | -2.044913               | -0.426669 | -0.447175 |
| 8                | 15               | 3.503046                | 0.562007  | 0.405680  |
| 9                | 15               | -2.724539               | 0.890719  | -0.835054 |
| 10               | 8                | 4.003391                | 1.449235  | -0.717183 |
| 11               | 8                | 4.606916                | -0.145463 | 1.182371  |
| 12               | 8                | -4.066149               | 0.683580  | -1.527206 |
| 13               | 8                | -2.828038               | 1.856577  | 0.344563  |
| 14               | 6                | 0.464312                | -1.484092 | -5.089563 |
| 15               | 6                | -0.662649               | 1.925711  | 4.390596  |
| 16               | 6                | -0.283715               | 1.508565  | 3.114032  |
| 17               | 6                | 0.421913                | 2.508440  | 2.238098  |
| 18               | 6                | 1.354901                | 2.952849  | 0.010558  |
| 19               | 6                | 2.558495                | 1.509942  | 1.636337  |
| 20               | 6                | -1.792898               | -0.139886 | 4.692317  |
| 21               | 6                | -1.371494               | -0.493582 | 3.435603  |
| 22               | 6                | -1.762054               | -1.842011 | 2.893541  |
| 23               | 6                | -1.422283               | 1.099789  | 5.183559  |
| 24               | 6                | 0.417899                | -2.558642 | -4.227180 |
| 25               | 6                | 0.416804                | -2.304337 | -2.876428 |
| 26               | 6                | 0.277386                | -3.428455 | -1.897009 |
| 27               | 6                | 0.539945                | -0.205432 | -4.573054 |
| 28               | 6                | 0.581960                | -0.030964 | -3.200545 |
| 29               | 6                | 0.783024                | 1.341019  | -2.604368 |
| 30               | 6                | 0.094197                | 2.988607  | -0.873655 |
| 31               | 6                | -1.610920               | 1.639620  | -2.045190 |
| 32               | 1                | 0.416452                | -1.631474 | -6.150090 |
| 33               | 1                | -0.368843               | 2.898414  | 4.726600  |
| 34               | 1                | -0.353343               | 3.149375  | 1.846493  |
| 35               | 1                | 1.045119                | 3.122815  | 2.883897  |
| 36               | 1                | 2.390965                | 0.857440  | 2.480068  |
| 37               | 1                | 3.138281                | 2.344570  | 2.022751  |
| 38               | 1                | -2.388191               | -0.834309 | 5.241541  |
| 39               | 1                | -1.726791               | 1.413683  | 6.162345  |
| 40               | 1                | 0.347031                | -3.571758 | -4.555234 |
| 41               | 1                | 0.498060                | 0.646085  | -5.214415 |
| 42               | 1                | 1.778263                | 1.374386  | -2.182096 |
| 43               | 1                | 0.725583                | 2.054712  | -3.417212 |
| 44               | 1                | -1.647116               | 1.083602  | -2.970122 |
| 45               | 1                | -1.957081               | 2.642458  | -2.269996 |



|    |   |           |           |           |
|----|---|-----------|-----------|-----------|
| 46 | 8 | -1.328758 | -2.131075 | 1.743409  |
| 47 | 8 | -2.466517 | -2.566335 | 3.622438  |
| 48 | 8 | 0.269285  | -3.071358 | -0.657786 |
| 49 | 8 | 0.143451  | -4.578383 | -2.320726 |
| 50 | 8 | -3.557901 | 4.262261  | -0.879787 |
| 51 | 1 | -3.186235 | 3.433216  | -0.533444 |
| 52 | 1 | -4.512361 | 4.049196  | -0.946385 |
| 53 | 8 | -5.806711 | 2.773836  | -0.799481 |
| 54 | 1 | -5.332197 | 2.045760  | -1.254884 |
| 55 | 1 | -5.823009 | 2.514191  | 0.139140  |
| 56 | 8 | -1.095950 | -4.673943 | 0.963504  |
| 57 | 1 | -1.545492 | -3.853010 | 1.256128  |
| 58 | 8 | 0.141574  | -4.214898 | 3.293170  |
| 59 | 1 | -0.222539 | -4.622164 | 2.473745  |
| 60 | 1 | -0.620033 | -3.891750 | 3.797002  |
| 61 | 1 | -0.413050 | -4.315901 | 0.346142  |
| 62 | 8 | -2.401454 | -5.246282 | -1.382961 |
| 63 | 1 | -1.566706 | -5.260445 | -1.887231 |
| 64 | 1 | -2.133630 | -5.218393 | -0.442806 |
| 65 | 8 | -4.946137 | -1.462108 | 2.401289  |
| 66 | 1 | -4.898311 | -0.494285 | 2.483265  |
| 67 | 1 | -4.212196 | -1.897836 | 2.858167  |
| 68 | 8 | -2.585817 | -2.615175 | -2.084391 |
| 69 | 1 | -2.697113 | -3.546881 | -1.800802 |
| 70 | 1 | -2.494380 | -1.992847 | -1.340965 |
| 71 | 8 | -5.907212 | -0.704834 | -0.023831 |
| 72 | 1 | -5.241025 | -0.425705 | -0.684964 |
| 73 | 1 | -5.515493 | -1.303625 | 0.640028  |
| 74 | 8 | -3.487640 | -0.789370 | -3.780162 |
| 75 | 1 | -3.138728 | -1.600230 | -3.340004 |
| 76 | 1 | -3.879103 | -0.240122 | -3.070448 |
| 77 | 8 | -5.256890 | 1.306652  | 1.599037  |
| 78 | 1 | -5.646530 | 0.634367  | 0.988407  |
| 79 | 1 | -4.353527 | 1.520649  | 1.280310  |
| 80 | 8 | -2.096634 | 4.250681  | 1.463747  |
| 81 | 1 | -2.364140 | 3.319300  | 1.332703  |
| 82 | 1 | -2.564666 | 4.727101  | 0.756429  |
| 83 | 8 | -2.219462 | 0.889618  | -5.330959 |
| 84 | 1 | -2.640056 | 0.140962  | -4.820848 |
| 85 | 1 | -2.739363 | 1.677738  | -5.117500 |
| 86 | 8 | 1.508350  | -2.154893 | 2.062224  |
| 87 | 8 | 3.846796  | -2.758112 | 1.165309  |
| 88 | 8 | 5.113039  | -0.219617 | -2.567716 |
| 89 | 8 | 6.843511  | -0.496136 | -0.284230 |
| 90 | 8 | 2.223074  | -0.707288 | 4.250076  |
| 91 | 8 | 4.655040  | 0.719299  | 3.885773  |
| 92 | 8 | 6.633212  | 1.829370  | -1.651052 |
| 93 | 8 | 3.615670  | -2.380307 | -1.529365 |
| 94 | 1 | 3.840031  | -2.888471 | 0.192899  |
| 95 | 1 | 4.272482  | -1.926544 | -2.084365 |

|     |   |           |           |           |
|-----|---|-----------|-----------|-----------|
| 96  | 1 | 3.057360  | -1.681621 | -1.126828 |
| 97  | 1 | 6.336376  | -0.801813 | -1.054088 |
| 98  | 1 | 6.167344  | -0.357037 | 0.419637  |
| 99  | 1 | 4.489131  | 0.306544  | -2.021100 |
| 100 | 1 | 5.854849  | 0.402599  | -2.689168 |
| 101 | 1 | 5.733548  | 2.008886  | -1.310936 |
| 102 | 1 | 6.972619  | 1.117424  | -1.067282 |
| 103 | 1 | 4.840543  | 0.434252  | 2.973059  |
| 104 | 1 | 3.883574  | 0.200330  | 4.173482  |
| 105 | 1 | 2.403326  | -2.460558 | 1.685568  |
| 106 | 1 | 1.035856  | -2.901699 | 2.502446  |
| 107 | 1 | 2.007791  | -1.245448 | 3.455170  |
| 108 | 1 | 1.459074  | -0.162847 | 4.466060  |
| 109 | 1 | 4.277225  | -1.887290 | 1.318636  |
| 110 | 6 | 1.685066  | 4.367524  | 0.569954  |
| 111 | 6 | 0.222266  | 4.125093  | -1.927592 |
| 112 | 6 | 0.477353  | 5.494806  | -1.284369 |
| 113 | 6 | 1.810774  | 5.431238  | -0.529143 |
| 114 | 1 | 2.605638  | 4.306522  | 1.138927  |
| 115 | 1 | 0.896260  | 4.696026  | 1.233076  |
| 116 | 1 | 2.611119  | 5.173353  | -1.216710 |
| 117 | 1 | 2.052786  | 6.391618  | -0.080522 |
| 118 | 1 | -0.325910 | 5.729580  | -0.593558 |
| 119 | 1 | 0.498858  | 6.263608  | -2.052551 |
| 120 | 1 | 1.053822  | 3.917703  | -2.590822 |
| 121 | 1 | -0.678988 | 4.162823  | -2.523935 |
| 122 | 1 | -0.760513 | 3.199595  | -0.254014 |
| 123 | 1 | 2.203899  | 2.637591  | -0.570008 |

---

HF = -4027.7181716 Hartree

Zero-point correction = 1.065967

Sum of electronic and thermal free energies = -4026.760301

[Gd(L<sup>3</sup>)(H<sub>2</sub>O)]<sup>3+</sup>·19H<sub>2</sub>O (*tw*)

(0 imaginary frequencies)

| Center<br>Number | Atomic<br>Number | Coordinates (Angstroms) |           |           |
|------------------|------------------|-------------------------|-----------|-----------|
|                  |                  | x                       | y         | z         |
| 1                | 64               | -0.165636               | -0.865219 | -0.232176 |
| 2                | 7                | -0.528729               | -0.921932 | 2.388948  |
| 3                | 7                | 0.646620                | 0.181220  | -2.628165 |
| 4                | 7                | -1.216226               | 1.939114  | -1.236336 |
| 5                | 7                | 0.160701                | 1.791966  | 1.437659  |
| 6                | 8                | -2.380975               | -0.426807 | 0.083616  |
| 7                | 8                | 1.960485                | -0.378981 | 0.481892  |
| 8                | 15               | -3.456034               | 0.532837  | -0.461519 |
| 9                | 15               | 2.670940                | 0.941182  | 0.805066  |
| 10               | 8                | -3.954748               | 1.440787  | 0.646425  |
| 11               | 8                | -4.561702               | -0.210524 | -1.201525 |
| 12               | 8                | 4.002738                | 0.734720  | 1.517417  |
| 13               | 8                | 2.812887                | 1.837471  | -0.424242 |
| 14               | 6                | -0.542521               | -1.201073 | 5.115385  |
| 15               | 6                | 0.739809                | 1.706015  | -4.436380 |
| 16               | 6                | 0.326755                | 1.360055  | -3.148390 |
| 17               | 6                | -0.395447               | 2.416892  | -2.357139 |
| 18               | 6                | -1.363186               | 2.999982  | -0.180651 |
| 19               | 6                | -2.542340               | 1.459309  | -1.726209 |
| 20               | 6                | 1.865350                | -0.374274 | -4.599680 |
| 21               | 6                | 1.412428                | -0.657598 | -3.336378 |
| 22               | 6                | 1.789184                | -1.974669 | -2.718551 |
| 23               | 6                | 1.513631                | 0.837976  | -5.166460 |
| 24               | 6                | -0.485059               | -2.315137 | 4.305865  |
| 25               | 6                | -0.462401               | -2.124623 | 2.945209  |
| 26               | 6                | -0.316276               | -3.293848 | 2.024764  |
| 27               | 6                | -0.610291               | 0.049995  | 4.535692  |
| 28               | 6                | -0.631468               | 0.159958  | 3.155484  |
| 29               | 6                | -0.831351               | 1.504653  | 2.500632  |
| 30               | 6                | -0.116578               | 3.080508  | 0.718324  |
| 31               | 6                | 1.571387                | 1.782480  | 1.963734  |
| 32               | 1                | -0.511062               | -1.297018 | 6.182393  |
| 33               | 1                | 0.459652                | 2.661222  | -4.829284 |
| 34               | 1                | 0.374508                | 3.080386  | -1.994001 |
| 35               | 1                | -1.001002               | 2.988739  | -3.057625 |
| 36               | 1                | -2.366062               | 0.781794  | -2.548020 |
| 37               | 1                | -3.140465               | 2.270361  | -2.135535 |
| 38               | 1                | 2.470405                | -1.099749 | -5.095266 |
| 39               | 1                | 1.843612                | 1.098157  | -6.152682 |
| 40               | 1                | -0.422596               | -3.311908 | 4.682128  |
| 41               | 1                | -0.578947               | 0.931763  | 5.135327  |
| 42               | 1                | -1.818960               | 1.512542  | 2.059936  |
| 43               | 1                | -0.796454               | 2.249726  | 3.287113  |
| 44               | 1                | 1.595471                | 1.287188  | 2.923140  |
| 45               | 1                | 1.933196                | 2.792599  | 2.122833  |

|    |   |           |           |           |
|----|---|-----------|-----------|-----------|
| 46 | 8 | 1.336443  | -2.203713 | -1.563147 |
| 47 | 8 | 2.502936  | -2.740328 | -3.396338 |
| 48 | 8 | -0.285256 | -2.994010 | 0.769689  |
| 49 | 8 | -0.198700 | -4.424732 | 2.499867  |
| 50 | 8 | 3.552324  | 4.291371  | 0.691056  |
| 51 | 1 | 3.179632  | 3.451472  | 0.372584  |
| 52 | 1 | 4.501598  | 4.070788  | 0.795324  |
| 53 | 8 | 5.782807  | 2.775980  | 0.742989  |
| 54 | 1 | 5.290379  | 2.073718  | 1.219322  |
| 55 | 1 | 5.816807  | 2.473901  | -0.182282 |
| 56 | 8 | 1.087040  | -4.726958 | -0.717247 |
| 57 | 1 | 1.550318  | -3.921424 | -1.028932 |
| 58 | 8 | -0.080230 | -4.340208 | -3.099586 |
| 59 | 1 | 0.251395  | -4.727529 | -2.257867 |
| 60 | 1 | 0.702728  | -4.043815 | -3.587373 |
| 61 | 1 | 0.390037  | -4.335943 | -0.138709 |
| 62 | 8 | 2.360598  | -5.165938 | 1.672375  |
| 63 | 1 | 1.518519  | -5.141970 | 2.163701  |
| 64 | 1 | 2.104320  | -5.195543 | 0.729150  |
| 65 | 8 | 4.980318  | -1.604725 | -2.257535 |
| 66 | 1 | 4.935393  | -0.641647 | -2.386095 |
| 67 | 1 | 4.238865  | -2.058410 | -2.684551 |
| 68 | 8 | 2.540877  | -2.498563 | 2.223437  |
| 69 | 1 | 2.655377  | -3.443304 | 1.989017  |
| 70 | 1 | 2.444977  | -1.915940 | 1.449991  |
| 71 | 8 | 5.882004  | -0.725389 | 0.148866  |
| 72 | 1 | 5.193722  | -0.413930 | 0.772494  |
| 73 | 1 | 5.511718  | -1.356429 | -0.497273 |
| 74 | 8 | 3.394745  | -0.586823 | 3.845868  |
| 75 | 1 | 3.054217  | -1.421099 | 3.445572  |
| 76 | 1 | 3.793798  | -0.079151 | 3.109523  |
| 77 | 8 | 5.266479  | 1.198140  | -1.590329 |
| 78 | 1 | 5.640455  | 0.560249  | -0.934671 |
| 79 | 1 | 4.357858  | 1.434555  | -1.303463 |
| 80 | 8 | 2.129551  | 4.183598  | -1.675304 |
| 81 | 1 | 2.382387  | 3.256576  | -1.493723 |
| 82 | 1 | 2.588687  | 4.688878  | -0.982578 |
| 83 | 8 | 2.130704  | 1.183186  | 5.295227  |
| 84 | 1 | 2.545025  | 0.404187  | 4.827155  |
| 85 | 1 | 2.665924  | 1.951804  | 5.050857  |
| 86 | 8 | -1.440464 | -2.217059 | -1.960442 |
| 87 | 8 | -3.791906 | -2.812925 | -1.090420 |
| 88 | 8 | -5.072423 | -0.146863 | 2.549123  |
| 89 | 8 | -6.797428 | -0.507934 | 0.274419  |
| 90 | 8 | -2.155867 | -0.879706 | -4.224617 |
| 91 | 8 | -4.620285 | 0.507441  | -3.950811 |
| 92 | 8 | -6.593372 | 1.866859  | 1.553265  |
| 93 | 8 | -3.566596 | -2.319761 | 1.581334  |
| 94 | 1 | -3.791720 | -2.906634 | -0.113928 |
| 95 | 1 | -4.219943 | -1.843693 | 2.121911  |

|     |   |           |           |           |
|-----|---|-----------|-----------|-----------|
| 96  | 1 | -3.005616 | -1.642104 | 1.150156  |
| 97  | 1 | -6.291613 | -0.785439 | 1.055743  |
| 98  | 1 | -6.119736 | -0.394716 | -0.432898 |
| 99  | 1 | -4.450037 | 0.362412  | 1.983658  |
| 100 | 1 | -5.816716 | 0.475678  | 2.649307  |
| 101 | 1 | -5.692392 | 2.034225  | 1.211435  |
| 102 | 1 | -6.928737 | 1.131916  | 0.996065  |
| 103 | 1 | -4.799796 | 0.271844  | -3.023008 |
| 104 | 1 | -3.833262 | -0.004674 | -4.206764 |
| 105 | 1 | -2.342298 | -2.509285 | -1.589528 |
| 106 | 1 | -0.966594 | -2.981749 | -2.365667 |
| 107 | 1 | -1.937105 | -1.374366 | -3.403896 |
| 108 | 1 | -1.387783 | -0.360214 | -4.483292 |
| 109 | 1 | -4.227956 | -1.951517 | -1.278320 |
| 110 | 6 | -1.674576 | 4.383966  | -0.821520 |
| 111 | 6 | -0.262309 | 4.265079  | 1.715565  |
| 112 | 6 | -0.506548 | 5.602879  | 1.003898  |
| 113 | 6 | -1.821659 | 5.502041  | 0.220173  |
| 114 | 1 | -2.581765 | 4.297424  | -1.408878 |
| 115 | 1 | -0.868793 | 4.674336  | -1.482620 |
| 116 | 1 | -2.638291 | 5.279499  | 0.901060  |
| 117 | 1 | -2.050991 | 6.439764  | -0.280237 |
| 118 | 1 | 0.312197  | 5.809279  | 0.322037  |
| 119 | 1 | -0.548308 | 6.406812  | 1.734527  |
| 120 | 1 | -1.104610 | 4.087081  | 2.374042  |
| 121 | 1 | 0.629197  | 4.330177  | 2.324712  |
| 122 | 1 | 0.746398  | 3.265412  | 0.100945  |
| 123 | 1 | -2.221683 | 2.719655  | 0.404300  |

---

HF = -4030.1292517 Hartree

Zero-point correction = 1.066220

Sum of electronic and thermal free energies = -4029.170596

[Ho(L<sup>3</sup>)(H<sub>2</sub>O)]<sup>3+</sup>·19H<sub>2</sub>O (*tw*)

(0 imaginary frequencies)

| Center<br>Number | Atomic<br>Number | Coordinates (Angstroms) |           |           |
|------------------|------------------|-------------------------|-----------|-----------|
|                  |                  | x                       | y         | z         |
| 1                | 67               | -0.161390               | -0.903822 | -0.220054 |
| 2                | 7                | -0.563888               | -0.845834 | 2.377430  |
| 3                | 7                | 0.660981                | 0.129456  | -2.598672 |
| 4                | 7                | -1.216319               | 1.956485  | -1.292070 |
| 5                | 7                | 0.137846                | 1.865782  | 1.389358  |
| 6                | 8                | -2.328111               | -0.426926 | 0.025575  |
| 7                | 8                | 1.895106                | -0.356316 | 0.506834  |
| 8                | 15               | -3.421089               | 0.526081  | -0.498076 |
| 9                | 15               | 2.628962                | 0.959731  | 0.798491  |
| 10               | 8                | -3.912648               | 1.424718  | 0.621195  |
| 11               | 8                | -4.531010               | -0.229439 | -1.219203 |
| 12               | 8                | 3.954074                | 0.744186  | 1.521540  |
| 13               | 8                | 2.797231                | 1.817587  | -0.454013 |
| 14               | 6                | -0.609960               | -1.057428 | 5.112437  |
| 15               | 6                | 0.775590                | 1.601565  | -4.451079 |
| 16               | 6                | 0.348173                | 1.293621  | -3.157268 |
| 17               | 6                | -0.378050               | 2.383631  | -2.414594 |
| 18               | 6                | -1.363381               | 3.043735  | -0.268797 |
| 19               | 6                | -2.537983               | 1.463428  | -1.771922 |
| 20               | 6                | 1.904023                | -0.478898 | -4.542483 |
| 21               | 6                | 1.438068                | -0.726046 | -3.276500 |
| 22               | 6                | 1.816417                | -2.023901 | -2.622358 |
| 23               | 6                | 1.556947                | 0.715253  | -5.148781 |
| 24               | 6                | -0.547792               | -2.191033 | 4.331205  |
| 25               | 6                | -0.507597               | -2.033633 | 2.966879  |
| 26               | 6                | -0.350803               | -3.226180 | 2.080851  |
| 27               | 6                | -0.667230               | 0.178042  | 4.500116  |
| 28               | 6                | -0.674295               | 0.255034  | 3.116922  |
| 29               | 6                | -0.870385               | 1.587347  | 2.435717  |
| 30               | 6                | -0.127109               | 3.137336  | 0.643246  |
| 31               | 6                | 1.541571                | 1.853609  | 1.926999  |
| 32               | 1                | -0.590522               | -1.126529 | 6.181784  |
| 33               | 1                | 0.499229                | 2.545173  | -4.873288 |
| 34               | 1                | 0.394060                | 3.052446  | -2.066256 |
| 35               | 1                | -0.966237               | 2.935176  | -3.146240 |
| 36               | 1                | -2.364732               | 0.785637  | -2.594491 |
| 37               | 1                | -3.150983               | 2.268125  | -2.173162 |
| 38               | 1                | 2.516578                | -1.216892 | -5.009330 |
| 39               | 1                | 1.896998                | 0.947370  | -6.138564 |
| 40               | 1                | -0.493279               | -3.178480 | 4.732365  |
| 41               | 1                | -0.638374               | 1.074413  | 5.077607  |
| 42               | 1                | -1.850562               | 1.581068  | 1.979038  |
| 43               | 1                | -0.856064               | 2.343942  | 3.212611  |
| 44               | 1                | 1.553157                | 1.386807  | 2.900936  |
| 45               | 1                | 1.919094                | 2.862484  | 2.055340  |

|    |   |           |           |           |
|----|---|-----------|-----------|-----------|
| 46 | 8 | 1.350719  | -2.229410 | -1.467788 |
| 47 | 8 | 2.542980  | -2.802682 | -3.271746 |
| 48 | 8 | -0.296025 | -2.957896 | 0.818445  |
| 49 | 8 | -0.243903 | -4.345646 | 2.583665  |
| 50 | 8 | 3.538575  | 4.294371  | 0.608934  |
| 51 | 1 | 3.167730  | 3.449293  | 0.301725  |
| 52 | 1 | 4.483438  | 4.070847  | 0.742334  |
| 53 | 8 | 5.756690  | 2.768836  | 0.746950  |
| 54 | 1 | 5.253322  | 2.076340  | 1.225956  |
| 55 | 1 | 5.804720  | 2.451402  | -0.172555 |
| 56 | 8 | 1.101759  | -4.743625 | -0.583488 |
| 57 | 1 | 1.571330  | -3.944815 | -0.902095 |
| 58 | 8 | -0.016248 | -4.403063 | -2.999430 |
| 59 | 1 | 0.294880  | -4.775482 | -2.143770 |
| 60 | 1 | 0.778597  | -4.111437 | -3.471005 |
| 61 | 1 | 0.391846  | -4.339427 | -0.031005 |
| 62 | 8 | 2.334574  | -5.106182 | 1.838760  |
| 63 | 1 | 1.484433  | -5.068856 | 2.314837  |
| 64 | 1 | 2.093615  | -5.164977 | 0.892907  |
| 65 | 8 | 5.037504  | -1.657713 | -2.199564 |
| 66 | 1 | 4.988074  | -0.695430 | -2.334772 |
| 67 | 1 | 4.281583  | -2.113072 | -2.599355 |
| 68 | 8 | 2.489970  | -2.421524 | 2.315986  |
| 69 | 1 | 2.614382  | -3.370901 | 2.107126  |
| 70 | 1 | 2.400930  | -1.859287 | 1.527161  |
| 71 | 8 | 5.864127  | -0.734124 | 0.223164  |
| 72 | 1 | 5.157703  | -0.416171 | 0.823284  |
| 73 | 1 | 5.515745  | -1.376245 | -0.424288 |
| 74 | 8 | 3.323267  | -0.464508 | 3.897879  |
| 75 | 1 | 2.979232  | -1.307944 | 3.521164  |
| 76 | 1 | 3.731686  | 0.013111  | 3.146545  |
| 77 | 8 | 5.273309  | 1.152119  | -1.561815 |
| 78 | 1 | 5.637410  | 0.530742  | -0.885010 |
| 79 | 1 | 4.358480  | 1.391421  | -1.297114 |
| 80 | 8 | 2.161787  | 4.134293  | -1.782782 |
| 81 | 1 | 2.399005  | 3.209758  | -1.569631 |
| 82 | 1 | 2.610729  | 4.654100  | -1.094398 |
| 83 | 8 | 2.052063  | 1.346660  | 5.291897  |
| 84 | 1 | 2.469567  | 0.556791  | 4.845480  |
| 85 | 1 | 2.583918  | 2.110589  | 5.026610  |
| 86 | 8 | -1.387186 | -2.259857 | -1.921112 |
| 87 | 8 | -3.755085 | -2.829231 | -1.091756 |
| 88 | 8 | -5.038375 | -0.131114 | 2.538858  |
| 89 | 8 | -6.759041 | -0.522321 | 0.262718  |
| 90 | 8 | -2.115285 | -0.944462 | -4.194019 |
| 91 | 8 | -4.600522 | 0.404065  | -3.991899 |
| 92 | 8 | -6.558890 | 1.867398  | 1.510675  |
| 93 | 8 | -3.536611 | -2.292335 | 1.563050  |
| 94 | 1 | -3.764676 | -2.915336 | -0.114612 |
| 95 | 1 | -4.178376 | -1.811724 | 2.113467  |

|     |   |           |           |           |
|-----|---|-----------|-----------|-----------|
| 96  | 1 | -2.975600 | -1.623039 | 1.121066  |
| 97  | 1 | -6.253167 | -0.792376 | 1.046565  |
| 98  | 1 | -6.081105 | -0.414610 | -0.445717 |
| 99  | 1 | -4.413397 | 0.372166  | 1.970081  |
| 100 | 1 | -5.785489 | 0.489882  | 2.625196  |
| 101 | 1 | -5.656591 | 2.030950  | 1.170944  |
| 102 | 1 | -6.891067 | 1.123985  | 0.962573  |
| 103 | 1 | -4.776993 | 0.200496  | -3.056030 |
| 104 | 1 | -3.798860 | -0.096467 | -4.224297 |
| 105 | 1 | -2.300122 | -2.540226 | -1.565954 |
| 106 | 1 | -0.913608 | -3.033122 | -2.309873 |
| 107 | 1 | -1.888130 | -1.430116 | -3.370437 |
| 108 | 1 | -1.330697 | -0.481717 | -4.505779 |
| 109 | 1 | -4.186028 | -1.966733 | -1.288642 |
| 110 | 6 | -1.650577 | 4.414841  | -0.947387 |
| 111 | 6 | -0.280540 | 4.342265  | 1.614873  |
| 112 | 6 | -0.509765 | 5.667578  | 0.874996  |
| 113 | 6 | -1.809433 | 5.556735  | 0.066699  |
| 114 | 1 | -2.546435 | 4.322607  | -1.551395 |
| 115 | 1 | -0.828997 | 4.681919  | -1.599349 |
| 116 | 1 | -2.640639 | 5.353722  | 0.736116  |
| 117 | 1 | -2.022968 | 6.485253  | -0.457483 |
| 118 | 1 | 0.322614  | 5.861559  | 0.205975  |
| 119 | 1 | -0.564427 | 6.484750  | 1.590077  |
| 120 | 1 | -1.131285 | 4.179057  | 2.266525  |
| 121 | 1 | 0.603873  | 4.414733  | 2.233829  |
| 122 | 1 | 0.743071  | 3.307526  | 0.031217  |
| 123 | 1 | -2.230623 | 2.785175  | 0.313824  |

---

HF = -4031.8920973 Hartree

Zero-point correction = 1.066458

Sum of electronic and thermal free energies = -4030.932834



[Lu(L<sup>3</sup>)(H<sub>2</sub>O)]<sup>3+</sup>·19H<sub>2</sub>O (*tw*)

(0 imaginary frequencies)

| Center<br>Number | Atomic<br>Number | Coordinates (Angstroms) |           |           |
|------------------|------------------|-------------------------|-----------|-----------|
|                  |                  | x                       | y         | z         |
| 1                | 71               | -0.158981               | -0.952637 | -0.209374 |
| 2                | 7                | -0.589323               | -0.782120 | 2.361662  |
| 3                | 7                | 0.674578                | 0.105939  | -2.553596 |
| 4                | 7                | -1.226457               | 1.991785  | -1.330960 |
| 5                | 7                | 0.105419                | 1.949630  | 1.354087  |
| 6                | 8                | -2.266292               | -0.433586 | -0.033814 |
| 7                | 8                | 1.812058                | -0.316422 | 0.512372  |
| 8                | 15               | -3.380790               | 0.505811  | -0.539157 |
| 9                | 15               | 2.571605                | 0.991294  | 0.783294  |
| 10               | 8                | -3.880330               | 1.386897  | 0.591332  |
| 11               | 8                | -4.485065               | -0.266828 | -1.251556 |
| 12               | 8                | 3.889027                | 0.756914  | 1.516029  |
| 13               | 8                | 2.769912                | 1.819323  | -0.484280 |
| 14               | 6                | -0.643754               | -0.937403 | 5.103640  |
| 15               | 6                | 0.870335                | 1.569159  | -4.409047 |
| 16               | 6                | 0.389505                | 1.269379  | -3.130901 |
| 17               | 6                | -0.363944               | 2.379246  | -2.442282 |
| 18               | 6                | -1.386448               | 3.092503  | -0.331196 |
| 19               | 6                | -2.532938               | 1.471356  | -1.811339 |
| 20               | 6                | 1.988313                | -0.514971 | -4.450678 |
| 21               | 6                | 1.475556                | -0.753618 | -3.201739 |
| 22               | 6                | 1.834843                | -2.048602 | -2.533669 |
| 23               | 6                | 1.672046                | 0.678455  | -5.074524 |
| 24               | 6                | -0.576727               | -2.086321 | 4.346156  |
| 25               | 6                | -0.531902               | -1.956087 | 2.979318  |
| 26               | 6                | -0.368298               | -3.166933 | 2.121957  |
| 27               | 6                | -0.703101               | 0.283665  | 4.464329  |
| 28               | 6                | -0.706766               | 0.333939  | 3.079202  |
| 29               | 6                | -0.912949               | 1.657268  | 2.381361  |
| 30               | 6                | -0.159229               | 3.205452  | 0.591568  |
| 31               | 6                | 1.504604                | 1.932170  | 1.891727  |
| 32               | 1                | -0.626952               | -0.983510 | 6.174251  |
| 33               | 1                | 0.617048                | 2.514031  | -4.842619 |
| 34               | 1                | 0.397635                | 3.063235  | -2.100800 |
| 35               | 1                | -0.932987               | 2.902159  | -3.210490 |
| 36               | 1                | -2.347785               | 0.800952  | -2.637477 |
| 37               | 1                | -3.169638               | 2.262207  | -2.204627 |
| 38               | 1                | 2.613462                | -1.258306 | -4.891375 |
| 39               | 1                | 2.051605                | 0.905754  | -6.050911 |
| 40               | 1                | -0.521300               | -3.065386 | 4.767287  |
| 41               | 1                | -0.677917               | 1.191841  | 5.023033  |
| 42               | 1                | -1.884733               | 1.628363  | 1.908899  |
| 43               | 1                | -0.929334               | 2.418243  | 3.155129  |
| 44               | 1                | 1.511402                | 1.491850  | 2.878134  |
| 45               | 1                | 1.899752                | 2.937971  | 1.990785  |

|    |   |           |           |           |
|----|---|-----------|-----------|-----------|
| 46 | 8 | 1.353683  | -2.245324 | -1.383593 |
| 47 | 8 | 2.565407  | -2.838772 | -3.165275 |
| 48 | 8 | -0.301543 | -2.924979 | 0.853699  |
| 49 | 8 | -0.266192 | -4.276650 | 2.645358  |
| 50 | 8 | 3.532000  | 4.305718  | 0.549312  |
| 51 | 1 | 3.155892  | 3.461562  | 0.246101  |
| 52 | 1 | 4.470430  | 4.071611  | 0.707422  |
| 53 | 8 | 5.726501  | 2.757779  | 0.758197  |
| 54 | 1 | 5.207886  | 2.074864  | 1.234676  |
| 55 | 1 | 5.788767  | 2.429768  | -0.156595 |
| 56 | 8 | 1.112434  | -4.758270 | -0.482792 |
| 57 | 1 | 1.579811  | -3.960013 | -0.805161 |
| 58 | 8 | 0.042918  | -4.452857 | -2.928026 |
| 59 | 1 | 0.335931  | -4.820135 | -2.064560 |
| 60 | 1 | 0.846841  | -4.155647 | -3.380782 |
| 61 | 1 | 0.389884  | -4.352580 | 0.049660  |
| 62 | 8 | 2.324917  | -5.051659 | 1.957931  |
| 63 | 1 | 1.470403  | -5.003152 | 2.424730  |
| 64 | 1 | 2.092842  | -5.139832 | 1.012354  |
| 65 | 8 | 5.059083  | -1.701476 | -2.129036 |
| 66 | 1 | 5.010819  | -0.740540 | -2.276072 |
| 67 | 1 | 4.299344  | -2.159476 | -2.518756 |
| 68 | 8 | 2.459103  | -2.356125 | 2.367056  |
| 69 | 1 | 2.593925  | -3.308075 | 2.177506  |
| 70 | 1 | 2.366552  | -1.810621 | 1.568125  |
| 71 | 8 | 5.827968  | -0.739763 | 0.297953  |
| 72 | 1 | 5.103047  | -0.414022 | 0.871866  |
| 73 | 1 | 5.500643  | -1.392940 | -0.349343 |
| 74 | 8 | 3.255863  | -0.362666 | 3.926089  |
| 75 | 1 | 2.918433  | -1.216351 | 3.569080  |
| 76 | 1 | 3.662750  | 0.094714  | 3.161020  |
| 77 | 8 | 5.263943  | 1.111498  | -1.531699 |
| 78 | 1 | 5.614768  | 0.505136  | -0.834536 |
| 79 | 1 | 4.346087  | 1.361551  | -1.287750 |
| 80 | 8 | 2.180421  | 4.124301  | -1.857166 |
| 81 | 1 | 2.403325  | 3.200950  | -1.624080 |
| 82 | 1 | 2.624879  | 4.651759  | -1.172019 |
| 83 | 8 | 1.989507  | 1.482318  | 5.281037  |
| 84 | 1 | 2.403213  | 0.682020  | 4.850286  |
| 85 | 1 | 2.522862  | 2.238965  | 4.998757  |
| 86 | 8 | -1.331486 | -2.295661 | -1.881217 |
| 87 | 8 | -3.713325 | -2.859420 | -1.094114 |
| 88 | 8 | -5.021795 | -0.136202 | 2.506686  |
| 89 | 8 | -6.721540 | -0.550820 | 0.217972  |
| 90 | 8 | -2.029653 | -1.000543 | -4.178516 |
| 91 | 8 | -4.542500 | 0.293543  | -4.042923 |
| 92 | 8 | -6.541766 | 1.849195  | 1.446992  |
| 93 | 8 | -3.508765 | -2.276619 | 1.547958  |
| 94 | 1 | -3.731862 | -2.931546 | -0.116083 |
| 95 | 1 | -4.151371 | -1.787999 | 2.091083  |

|     |   |           |           |           |
|-----|---|-----------|-----------|-----------|
| 96  | 1 | -2.939052 | -1.617919 | 1.104750  |
| 97  | 1 | -6.221706 | -0.813459 | 1.008124  |
| 98  | 1 | -6.037992 | -0.447574 | -0.485916 |
| 99  | 1 | -4.399074 | 0.366594  | 1.932868  |
| 100 | 1 | -5.773811 | 0.479152  | 2.586353  |
| 101 | 1 | -5.636322 | 2.011242  | 1.116160  |
| 102 | 1 | -6.865771 | 1.099165  | 0.902899  |
| 103 | 1 | -4.721912 | 0.113764  | -3.102821 |
| 104 | 1 | -3.726919 | -0.194069 | -4.253555 |
| 105 | 1 | -2.253790 | -2.567997 | -1.544174 |
| 106 | 1 | -0.857846 | -3.074174 | -2.258388 |
| 107 | 1 | -1.810721 | -1.473449 | -3.346070 |
| 108 | 1 | -1.247541 | -0.526791 | -4.479189 |
| 109 | 1 | -4.142632 | -1.999244 | -1.305890 |
| 110 | 6 | -1.669648 | 4.451665  | -1.034406 |
| 111 | 6 | -0.327178 | 4.422363  | 1.545399  |
| 112 | 6 | -0.557205 | 5.736995  | 0.786516  |
| 113 | 6 | -1.844611 | 5.608245  | -0.039326 |
| 114 | 1 | -2.557834 | 4.347300  | -1.648094 |
| 115 | 1 | -0.841107 | 4.709236  | -1.682059 |
| 116 | 1 | -2.684136 | 5.411432  | 0.621684  |
| 117 | 1 | -2.054606 | 6.528821  | -0.578859 |
| 118 | 1 | 0.282823  | 5.930112  | 0.126593  |
| 119 | 1 | -0.628120 | 6.562863  | 1.490242  |
| 120 | 1 | -1.181718 | 4.261493  | 2.192958  |
| 121 | 1 | 0.552418  | 4.505736  | 2.170557  |
| 122 | 1 | 0.715387  | 3.372855  | -0.015956 |
| 123 | 1 | -2.257445 | 2.839241  | 0.248657  |

---

HF = -4034.1976466 Hartree

Zero-point correction = 1.066423

Sum of electronic and thermal free energies = -4033.238341

[La(L<sup>3</sup>)(H<sub>2</sub>O)]<sup>3+</sup>·19H<sub>2</sub>O (*tf*)

(0 imaginary frequencies)

| Center<br>Number | Atomic<br>Number | Coordinates (Angstroms) |           |           |
|------------------|------------------|-------------------------|-----------|-----------|
|                  |                  | x                       | y         | z         |
| 1                | 57               | 0.359494                | 0.725621  | -0.522229 |
| 2                | 7                | 0.872020                | 1.243239  | 2.108968  |
| 3                | 7                | -1.009415               | -0.517309 | -2.560714 |
| 4                | 7                | 1.131630                | -1.966858 | -1.289047 |
| 5                | 7                | -0.125100               | -1.399199 | 1.477769  |
| 6                | 8                | 2.731496                | 0.248305  | -0.227539 |
| 7                | 8                | -1.981733               | 0.528710  | 0.123640  |
| 8                | 15               | 3.622106                | -0.785266 | -0.946514 |
| 9                | 15               | -2.699674               | -0.649741 | 0.777171  |
| 10               | 8                | 4.228406                | -1.754041 | 0.053951  |
| 11               | 8                | 4.645600                | -0.141882 | -1.870029 |
| 12               | 8                | -3.950200               | -0.293037 | 1.571397  |
| 13               | 8                | -2.960396               | -1.800546 | -0.199786 |
| 14               | 6                | 1.013058                | 1.938151  | 4.751053  |
| 15               | 6                | -1.875208               | -2.467278 | -3.572090 |
| 16               | 6                | -0.909180               | -1.809130 | -2.807883 |
| 17               | 6                | 0.200825                | -2.654360 | -2.224222 |
| 18               | 6                | 1.336213                | -2.772016 | -0.020497 |
| 19               | 6                | 2.433976                | -1.685852 | -1.988937 |
| 20               | 6                | -3.062533               | -0.413929 | -3.750272 |
| 21               | 6                | -2.071957               | 0.167259  | -3.006288 |
| 22               | 6                | -2.172448               | 1.623433  | -2.637199 |
| 23               | 6                | -2.954349               | -1.766541 | -4.043358 |
| 24               | 6                | 1.114211                | 2.910105  | 3.771847  |
| 25               | 6                | 1.009991                | 2.517472  | 2.457726  |
| 26               | 6                | 1.010726                | 3.545238  | 1.358120  |
| 27               | 6                | 0.851871                | 0.616758  | 4.384151  |
| 28               | 6                | 0.833074                | 0.291582  | 3.035120  |
| 29               | 6                | 0.827778                | -1.153946 | 2.588930  |
| 30               | 6                | 0.040085                | -2.755197 | 0.820517  |
| 31               | 6                | -1.519337               | -1.229694 | 2.013542  |
| 32               | 1                | 1.033943                | 2.207047  | 5.788646  |
| 33               | 1                | -1.796323               | -3.525388 | -3.709293 |
| 34               | 1                | -0.303453               | -3.467665 | -1.724787 |
| 35               | 1                | 0.763106                | -3.082492 | -3.049373 |
| 36               | 1                | 2.110178                | -2.271446 | 0.526360  |
| 37               | 1                | 2.238624                | -1.091201 | -2.868248 |
| 38               | 1                | 2.880719                | -2.613363 | -2.339967 |
| 39               | 1                | -3.908552               | 0.166684  | -4.042856 |
| 40               | 1                | -3.724945               | -2.262589 | -4.598946 |
| 41               | 1                | 1.242324                | 3.948370  | 3.987438  |
| 42               | 1                | 0.643630                | -0.139384 | 5.107914  |
| 43               | 1                | 1.830787                | -1.391285 | 2.262441  |
| 44               | 1                | 0.586353                | -1.761946 | 3.452006  |
| 45               | 1                | -0.808200               | -2.848476 | 0.168600  |

|    |   |           |           |           |
|----|---|-----------|-----------|-----------|
| 46 | 1 | -1.495576 | -0.489166 | 2.795348  |
| 47 | 1 | -1.869687 | -2.146816 | 2.469922  |
| 48 | 8 | -1.119796 | 2.145691  | -2.130206 |
| 49 | 8 | -3.237156 | 2.211348  | -2.872162 |
| 50 | 8 | 0.961051  | 3.074062  | 0.164047  |
| 51 | 8 | 1.007447  | 4.738788  | 1.673502  |
| 52 | 8 | -3.345788 | -4.008169 | 1.423628  |
| 53 | 1 | -3.119660 | -3.230403 | 0.879146  |
| 54 | 1 | -4.262108 | -3.808732 | 1.709752  |
| 55 | 8 | -5.618347 | -2.612890 | 1.674198  |
| 56 | 1 | -5.141689 | -1.782970 | 1.881151  |
| 57 | 1 | -5.842629 | -2.540307 | 0.728721  |
| 58 | 8 | -1.258224 | 4.566296  | -1.010365 |
| 59 | 1 | -1.323339 | 3.660000  | -1.396029 |
| 60 | 8 | -2.978213 | 5.142679  | -3.204903 |
| 61 | 1 | -2.368912 | 5.244685  | -2.455547 |
| 62 | 1 | -3.244323 | 4.208593  | -3.190596 |
| 63 | 1 | -0.320561 | 4.701749  | -0.813023 |
| 64 | 8 | -1.836732 | 4.836778  | 1.595352  |
| 65 | 1 | -0.923296 | 5.110822  | 1.774653  |
| 66 | 1 | -1.898238 | 4.704717  | 0.622805  |
| 67 | 8 | -5.715325 | 0.996010  | -2.288878 |
| 68 | 1 | -5.575210 | 0.045859  | -2.138388 |
| 69 | 1 | -4.869277 | 1.450696  | -2.452140 |
| 70 | 8 | -2.272443 | 3.133888  | 3.544462  |
| 71 | 1 | -2.289162 | 3.731715  | 2.751140  |
| 72 | 1 | -1.356066 | 3.052540  | 3.830825  |
| 73 | 8 | -6.227048 | 0.609406  | 0.396732  |
| 74 | 1 | -5.387086 | 0.526005  | 0.899114  |
| 75 | 1 | -6.084106 | 1.094343  | -0.437648 |
| 76 | 8 | -3.165821 | 0.671136  | 4.033972  |
| 77 | 1 | -2.929302 | 1.613373  | 3.865440  |
| 78 | 1 | -3.585404 | 0.309292  | 3.225058  |
| 79 | 8 | -5.632611 | -1.602773 | -0.968441 |
| 80 | 1 | -5.976061 | -0.865778 | -0.407114 |
| 81 | 1 | -4.668238 | -1.698109 | -0.808623 |
| 82 | 8 | -2.261629 | -4.353649 | -1.108435 |
| 83 | 1 | -2.518691 | -3.411887 | -1.090490 |
| 84 | 1 | -2.627389 | -4.714670 | -0.282478 |
| 85 | 8 | -1.577822 | -0.921777 | 5.418598  |
| 86 | 1 | -2.172717 | -0.258890 | 4.966416  |
| 87 | 1 | -1.875409 | -1.794822 | 5.128459  |
| 88 | 8 | 2.823174  | 3.556332  | -1.838899 |
| 89 | 8 | 5.064078  | 2.510549  | -1.097634 |
| 90 | 8 | 5.745935  | -0.524733 | 1.817956  |
| 91 | 8 | 7.113503  | -0.297689 | -0.708014 |
| 92 | 8 | 1.449574  | 1.673576  | -2.724691 |
| 93 | 8 | 3.276835  | 0.234925  | -4.332696 |
| 94 | 8 | 6.849995  | -2.686031 | 0.537836  |
| 95 | 8 | 4.269182  | 1.769979  | 1.364317  |

|     |   |           |           |           |
|-----|---|-----------|-----------|-----------|
| 96  | 1 | 4.916154  | 2.384856  | -0.131743 |
| 97  | 1 | 4.889789  | 1.138524  | 1.772330  |
| 98  | 1 | 3.589676  | 1.251868  | 0.876609  |
| 99  | 1 | 6.767258  | 0.007596  | 0.147060  |
| 100 | 1 | 6.344035  | -0.278319 | -1.319907 |
| 101 | 1 | 5.045393  | -0.951444 | 1.259352  |
| 102 | 1 | 6.433798  | -1.210219 | 1.864934  |
| 103 | 1 | 5.893256  | -2.705722 | 0.344266  |
| 104 | 1 | 7.184160  | -1.963093 | -0.034520 |
| 105 | 1 | 3.952171  | 0.119804  | -3.638887 |
| 106 | 1 | 2.583749  | 0.782652  | -3.926315 |
| 107 | 1 | 3.755270  | 3.263018  | -1.610160 |
| 108 | 1 | 2.297126  | 3.638368  | -1.024392 |
| 109 | 1 | 2.074415  | 2.453771  | -2.460667 |
| 110 | 1 | 0.620148  | 2.019140  | -3.085475 |
| 111 | 1 | 5.022987  | 1.622671  | -1.508805 |
| 112 | 6 | -0.064347 | -3.919224 | 1.843235  |
| 113 | 1 | 0.576435  | -3.738932 | 2.698666  |
| 114 | 1 | -1.090146 | -3.988433 | 2.173264  |
| 115 | 6 | 1.920211  | -4.171072 | -0.360674 |
| 116 | 1 | 1.418738  | -4.591410 | -1.223064 |
| 117 | 1 | 2.961350  | -4.013935 | -0.608344 |
| 118 | 6 | 1.801249  | -5.186481 | 0.782126  |
| 119 | 6 | 0.336879  | -5.263820 | 1.221743  |
| 120 | 1 | 2.165479  | -6.152779 | 0.442103  |
| 121 | 1 | 2.418916  | -4.880628 | 1.622053  |
| 122 | 1 | -0.302189 | -5.462075 | 0.367793  |
| 123 | 1 | 0.185779  | -6.057071 | 1.948996  |

---

HF = -4025.8103772 Hartree

Zero-point correction = 1.065660

Sum of electronic and thermal free energies = -4024.851446

[Nd(L<sup>3</sup>)(H<sub>2</sub>O)]<sup>3+</sup>·19H<sub>2</sub>O (*tf*)

(0 imaginary frequencies)

| Center<br>Number | Atomic<br>Number | Coordinates (Angstroms) |           |           |
|------------------|------------------|-------------------------|-----------|-----------|
|                  |                  | x                       | y         | z         |
| 1                | 60               | -0.349409               | -0.681203 | -0.530778 |
| 2                | 7                | -0.786819               | -1.266270 | 2.047699  |
| 3                | 7                | 0.958754                | 0.610728  | -2.504949 |
| 4                | 7                | -1.219291               | 1.995942  | -1.221726 |
| 5                | 7                | 0.071730                | 1.453441  | 1.501059  |
| 6                | 8                | -2.679396               | -0.325443 | -0.208817 |
| 7                | 8                | 1.906382                | -0.444680 | 0.158256  |
| 8                | 15               | -3.635622               | 0.689662  | -0.868487 |
| 9                | 15               | 2.634162                | 0.734093  | 0.800945  |
| 10               | 8                | -4.257083               | 1.592565  | 0.183369  |
| 11               | 8                | -4.655969               | 0.034054  | -1.786620 |
| 12               | 8                | 3.906223                | 0.370472  | 1.556310  |
| 13               | 8                | 2.877848                | 1.888688  | -0.175801 |
| 14               | 6                | -0.819318               | -2.035475 | 4.672519  |
| 15               | 6                | 1.732543                | 2.580085  | -3.552784 |
| 16               | 6                | 0.804972                | 1.894391  | -2.764753 |
| 17               | 6                | -0.316737               | 2.708566  | -2.163317 |
| 18               | 6                | -1.449537               | 2.805475  | 0.039998  |
| 19               | 6                | -2.517432               | 1.673594  | -1.909009 |
| 20               | 6                | 3.001430                | 0.576249  | -3.718789 |
| 21               | 6                | 2.042629                | -0.035126 | -2.958476 |
| 22               | 6                | 2.194485                | -1.485002 | -2.586991 |
| 23               | 6                | 2.833939                | 1.919189  | -4.028454 |
| 24               | 6                | -0.886240               | -2.986411 | 3.670511  |
| 25               | 6                | -0.840352               | -2.553951 | 2.365827  |
| 26               | 6                | -0.832028               | -3.540887 | 1.232722  |
| 27               | 6                | -0.756650               | -0.697947 | 4.336138  |
| 28               | 6                | -0.787817               | -0.338147 | 2.997161  |
| 29               | 6                | -0.888727               | 1.110139  | 2.579277  |
| 30               | 6                | -0.169605               | 2.822373  | 0.902955  |
| 31               | 6                | 1.473418                | 1.334669  | 2.045383  |
| 32               | 1                | -0.796020               | -2.330021 | 5.702783  |
| 33               | 1                | 1.606688                | 3.631388  | -3.705035 |
| 34               | 1                | 0.183418                | 3.524105  | -1.663742 |
| 35               | 1                | -0.897150               | 3.134301  | -2.977413 |
| 36               | 1                | -2.231783               | 2.306713  | 0.577053  |
| 37               | 1                | -2.314663               | 1.110870  | -2.806901 |
| 38               | 1                | -3.013772               | 2.586615  | -2.229555 |
| 39               | 1                | 3.867937                | 0.027563  | -4.012953 |
| 40               | 1                | 3.576001                | 2.438942  | -4.600954 |
| 41               | 1                | -0.951689               | -4.035500 | 3.861537  |
| 42               | 1                | -0.595431               | 0.049139  | 5.079969  |
| 43               | 1                | -1.896847               | 1.268664  | 2.222757  |
| 44               | 1                | -0.730565               | 1.720867  | 3.459643  |
| 45               | 1                | 0.675028                | 3.038453  | 0.274711  |

|    |   |           |           |           |
|----|---|-----------|-----------|-----------|
| 46 | 1 | 1.464570  | 0.645973  | 2.875655  |
| 47 | 1 | 1.812497  | 2.284168  | 2.436348  |
| 48 | 8 | 1.152375  | -2.040527 | -2.094161 |
| 49 | 8 | 3.279774  | -2.035805 | -2.815090 |
| 50 | 8 | -0.831245 | -3.019955 | 0.059469  |
| 51 | 8 | -0.790438 | -4.746044 | 1.498382  |
| 52 | 8 | 3.178160  | 4.099493  | 1.469553  |
| 53 | 1 | 2.998852  | 3.316057  | 0.915610  |
| 54 | 1 | 4.096511  | 3.938397  | 1.770472  |
| 55 | 8 | 5.489229  | 2.763236  | 1.729307  |
| 56 | 1 | 5.045989  | 1.912016  | 1.921051  |
| 57 | 1 | 5.718252  | 2.715662  | 0.783174  |
| 58 | 8 | 1.337963  | -4.545212 | -1.185667 |
| 59 | 1 | 1.363132  | -3.601155 | -1.474614 |
| 60 | 8 | 3.111394  | -4.939867 | -3.360413 |
| 61 | 1 | 2.480195  | -5.095035 | -2.638238 |
| 62 | 1 | 3.363416  | -4.005812 | -3.276398 |
| 63 | 1 | 0.412667  | -4.740425 | -0.984625 |
| 64 | 8 | 2.002303  | -5.063897 | 1.360677  |
| 65 | 1 | 1.068579  | -5.256970 | 1.546682  |
| 66 | 1 | 2.042338  | -4.844330 | 0.403621  |
| 67 | 8 | 5.731954  | -0.737794 | -2.322577 |
| 68 | 1 | 5.563998  | 0.202354  | -2.139154 |
| 69 | 1 | 4.895785  | -1.219498 | -2.458889 |
| 70 | 8 | 2.504371  | -3.439429 | 3.360440  |
| 71 | 1 | 2.494676  | -4.016438 | 2.551726  |
| 72 | 1 | 1.589070  | -3.290291 | 3.623797  |
| 73 | 8 | 6.229066  | -0.407098 | 0.378530  |
| 74 | 1 | 5.380042  | -0.368802 | 0.870633  |
| 75 | 1 | 6.113879  | -0.875742 | -0.468996 |
| 76 | 8 | 3.337613  | -0.952437 | 3.867906  |
| 77 | 1 | 3.152540  | -1.897877 | 3.667069  |
| 78 | 1 | 3.659495  | -0.493891 | 3.062721  |
| 79 | 8 | 5.547555  | 1.811677  | -0.931725 |
| 80 | 1 | 5.919781  | 1.077073  | -0.386448 |
| 81 | 1 | 4.578769  | 1.861831  | -0.773693 |
| 82 | 8 | 2.100367  | 4.396108  | -1.061290 |
| 83 | 1 | 2.390066  | 3.461663  | -1.039966 |
| 84 | 1 | 2.444463  | 4.769685  | -0.231642 |
| 85 | 8 | 1.823659  | 0.560999  | 5.341597  |
| 86 | 1 | 2.388246  | -0.101223 | 4.842363  |
| 87 | 1 | 2.218683  | 1.427853  | 5.171638  |
| 88 | 8 | -2.701005 | -3.544843 | -1.913389 |
| 89 | 8 | -4.978141 | -2.644022 | -1.101671 |
| 90 | 8 | -5.724071 | 0.276480  | 1.918030  |
| 91 | 8 | -7.112887 | 0.088527  | -0.593494 |
| 92 | 8 | -1.394825 | -1.576233 | -2.708304 |
| 93 | 8 | -3.303887 | -0.223432 | -4.282575 |
| 94 | 8 | -6.897797 | 2.450602  | 0.710459  |
| 95 | 8 | -4.151572 | -1.939975 | 1.361109  |



|     |   |           |           |           |
|-----|---|-----------|-----------|-----------|
| 96  | 1 | -4.812521 | -2.542580 | -0.135875 |
| 97  | 1 | -4.787547 | -1.344540 | 1.797938  |
| 98  | 1 | -3.494423 | -1.386693 | 0.882558  |
| 99  | 1 | -6.748710 | -0.228924 | 0.249812  |
| 100 | 1 | -6.349832 | 0.106504  | -1.213359 |
| 101 | 1 | -5.043976 | 0.740683  | 1.362618  |
| 102 | 1 | -6.429564 | 0.940314  | 1.998214  |
| 103 | 1 | -5.943933 | 2.500598  | 0.509192  |
| 104 | 1 | -7.218304 | 1.732876  | 0.123851  |
| 105 | 1 | -3.978478 | -0.162201 | -3.581608 |
| 106 | 1 | -2.573361 | -0.729625 | -3.888067 |
| 107 | 1 | -3.643653 | -3.308113 | -1.663818 |
| 108 | 1 | -2.162401 | -3.628846 | -1.107387 |
| 109 | 1 | -1.996985 | -2.385875 | -2.476577 |
| 110 | 1 | -0.557203 | -1.891641 | -3.077349 |
| 111 | 1 | -4.974841 | -1.742181 | -1.484275 |
| 112 | 6 | -0.178612 | 3.939479  | 1.982617  |
| 113 | 1 | -0.871827 | 3.703045  | 2.781193  |
| 114 | 1 | 0.818769  | 4.021965  | 2.389290  |
| 115 | 6 | -2.027019 | 4.203812  | -0.315530 |
| 116 | 1 | -1.465640 | 4.652347  | -1.124918 |
| 117 | 1 | -3.044816 | 4.048780  | -0.648234 |
| 118 | 6 | -2.012532 | 5.192685  | 0.856690  |
| 119 | 6 | -0.581916 | 5.297521  | 1.392497  |
| 120 | 1 | -2.381011 | 6.157661  | 0.516997  |
| 121 | 1 | -2.674187 | 4.847716  | 1.646215  |
| 122 | 1 | 0.099347  | 5.554075  | 0.587332  |
| 123 | 1 | -0.503459 | 6.064949  | 2.158148  |

---

HF = -4027.7144096 Hartree

Zero-point correction = 1.065494

Sum of electronic and thermal free energies = -4026.756676

[Gd(L<sup>3</sup>)(H<sub>2</sub>O)]<sup>3+</sup>·19H<sub>2</sub>O (*tf*)

(0 imaginary frequencies)

| Center<br>Number | Atomic<br>Number | Coordinates (Angstroms) |           |           |
|------------------|------------------|-------------------------|-----------|-----------|
|                  |                  | x                       | y         | z         |
| 1                | 64               | -0.347463               | -0.680495 | -0.525165 |
| 2                | 7                | -0.841323               | -1.169064 | 2.025772  |
| 3                | 7                | 0.999152                | 0.496107  | -2.494946 |
| 4                | 7                | -1.153242               | 1.970070  | -1.314138 |
| 5                | 7                | 0.076230                | 1.475440  | 1.435110  |
| 6                | 8                | -2.614265               | -0.289787 | -0.234220 |
| 7                | 8                | 1.860129                | -0.492843 | 0.155071  |
| 8                | 15               | -3.571157               | 0.707500  | -0.921214 |
| 9                | 15               | 2.621461                | 0.677080  | 0.780093  |
| 10               | 8                | -4.180367               | 1.644115  | 0.108110  |
| 11               | 8                | -4.602710               | 0.029666  | -1.810203 |
| 12               | 8                | 3.866981                | 0.296978  | 1.570354  |
| 13               | 8                | 2.911945                | 1.797334  | -0.223540 |
| 14               | 6                | -1.049132               | -1.893908 | 4.657774  |
| 15               | 6                | 1.841597                | 2.398201  | -3.613976 |
| 16               | 6                | 0.884980                | 1.770558  | -2.813014 |
| 17               | 6                | -0.228840               | 2.631241  | -2.269403 |
| 18               | 6                | -1.369466               | 2.822196  | -0.081303 |
| 19               | 6                | -2.452415               | 1.650046  | -1.995783 |
| 20               | 6                | 3.055779                | 0.356021  | -3.679045 |
| 21               | 6                | 2.070206                | -0.196089 | -2.907466 |
| 22               | 6                | 2.170467                | -1.633128 | -2.478570 |
| 23               | 6                | 2.931319                | 1.689085  | -4.045313 |
| 24               | 6                | -1.083798               | -2.859560 | 3.667351  |
| 25               | 6                | -0.951995               | -2.448812 | 2.362330  |
| 26               | 6                | -0.914608               | -3.445168 | 1.242104  |
| 27               | 6                | -0.925654               | -0.564906 | 4.305404  |
| 28               | 6                | -0.870648               | -0.227025 | 2.960337  |
| 29               | 6                | -0.898732               | 1.217247  | 2.519918  |
| 30               | 6                | -0.086205               | 2.822992  | 0.771947  |
| 31               | 6                | 1.460136                | 1.317692  | 1.997731  |
| 32               | 1                | -1.096458               | -2.172338 | 5.691941  |
| 33               | 1                | 1.744746                | 3.444898  | -3.813767 |
| 34               | 1                | 0.272076                | 3.462240  | -1.796444 |
| 35               | 1                | -0.790407               | 3.028835  | -3.110534 |
| 36               | 1                | -2.158503               | 2.352818  | 0.471000  |
| 37               | 1                | -2.252907               | 1.058755  | -2.874655 |
| 38               | 1                | -2.937435               | 2.560779  | -2.339506 |
| 39               | 1                | 3.909860                | -0.228606 | -3.938146 |
| 40               | 1                | 3.695253                | 2.164051  | -4.627908 |
| 41               | 1                | -1.189808               | -3.903207 | 3.869659  |
| 42               | 1                | -0.776500               | 0.192755  | 5.041732  |
| 43               | 1                | -1.898805               | 1.425861  | 2.166750  |
| 44               | 1                | -0.695489               | 1.832407  | 3.388431  |
| 45               | 1                | 0.768627                | 2.922542  | 0.129331  |

|    |   |           |           |           |
|----|---|-----------|-----------|-----------|
| 46 | 1 | 1.422853  | 0.613267  | 2.811586  |
| 47 | 1 | 1.819466  | 2.250533  | 2.411563  |
| 48 | 8 | 1.100148  | -2.135543 | -1.989725 |
| 49 | 8 | 3.241904  | -2.225177 | -2.664675 |
| 50 | 8 | -0.871876 | -2.930959 | 0.067618  |
| 51 | 8 | -0.889350 | -4.650738 | 1.511197  |
| 52 | 8 | 3.287192  | 4.039048  | 1.362003  |
| 53 | 1 | 3.067567  | 3.252887  | 0.826908  |
| 54 | 1 | 4.195119  | 3.838590  | 1.672870  |
| 55 | 8 | 5.542860  | 2.633969  | 1.686586  |
| 56 | 1 | 5.066898  | 1.805869  | 1.898782  |
| 57 | 1 | 5.780535  | 2.548696  | 0.745173  |
| 58 | 8 | 1.332864  | -4.575243 | -0.902607 |
| 59 | 1 | 1.298246  | -3.657098 | -1.266720 |
| 60 | 8 | 3.122668  | -5.151663 | -3.010411 |
| 61 | 1 | 2.489060  | -5.241813 | -2.278606 |
| 62 | 1 | 3.360273  | -4.210077 | -3.010474 |
| 63 | 1 | 0.421312  | -4.828732 | -0.703300 |
| 64 | 8 | 1.921400  | -4.757260 | 1.704637  |
| 65 | 1 | 0.995437  | -5.009770 | 1.847801  |
| 66 | 1 | 2.008276  | -4.632004 | 0.733793  |
| 67 | 8 | 5.728688  | -1.002561 | -2.237705 |
| 68 | 1 | 5.589594  | -0.052278 | -2.085566 |
| 69 | 1 | 4.876375  | -1.461777 | -2.353644 |
| 70 | 8 | 2.294720  | -3.087201 | 3.693389  |
| 71 | 1 | 2.340265  | -3.670913 | 2.890727  |
| 72 | 1 | 1.362795  | -2.954439 | 3.900946  |
| 73 | 8 | 6.178700  | -0.595241 | 0.465615  |
| 74 | 1 | 5.322362  | -0.516997 | 0.941189  |
| 75 | 1 | 6.067924  | -1.090299 | -0.367141 |
| 76 | 8 | 3.110025  | -0.577932 | 4.067632  |
| 77 | 1 | 2.909844  | -1.535720 | 3.948246  |
| 78 | 1 | 3.511640  | -0.240875 | 3.239124  |
| 79 | 8 | 5.597953  | 1.596427  | -0.933816 |
| 80 | 1 | 5.932366  | 0.867494  | -0.356586 |
| 81 | 1 | 4.629111  | 1.687689  | -0.797423 |
| 82 | 8 | 2.233091  | 4.352450  | -1.181840 |
| 83 | 1 | 2.484890  | 3.409815  | -1.154150 |
| 84 | 1 | 2.592371  | 4.718656  | -0.355270 |
| 85 | 8 | 1.466244  | 0.998085  | 5.396861  |
| 86 | 1 | 2.084015  | 0.342904  | 4.963878  |
| 87 | 1 | 1.759633  | 1.874584  | 5.112627  |
| 88 | 8 | -2.711824 | -3.508210 | -1.920263 |
| 89 | 8 | -4.989438 | -2.623921 | -1.082434 |
| 90 | 8 | -5.617858 | 0.368971  | 1.901955  |
| 91 | 8 | -7.047458 | 0.143520  | -0.584935 |
| 92 | 8 | -1.381596 | -1.524068 | -2.656938 |
| 93 | 8 | -3.331846 | -0.273650 | -4.331088 |
| 94 | 8 | -6.798510 | 2.526250  | 0.677311  |
| 95 | 8 | -4.103748 | -1.881011 | 1.343320  |

|     |   |           |           |           |
|-----|---|-----------|-----------|-----------|
| 96  | 1 | -4.801134 | -2.510811 | -0.121937 |
| 97  | 1 | -4.718107 | -1.270564 | 1.790347  |
| 98  | 1 | -3.444752 | -1.342920 | 0.850117  |
| 99  | 1 | -6.672272 | -0.161529 | 0.258063  |
| 100 | 1 | -6.294822 | 0.142133  | -1.216947 |
| 101 | 1 | -4.943635 | 0.817049  | 1.327390  |
| 102 | 1 | -6.317344 | 1.039444  | 1.980383  |
| 103 | 1 | -5.848060 | 2.566170  | 0.457760  |
| 104 | 1 | -7.133657 | 1.801869  | 0.107524  |
| 105 | 1 | -3.981566 | -0.189617 | -3.608619 |
| 106 | 1 | -2.585508 | -0.758235 | -3.942738 |
| 107 | 1 | -3.654575 | -3.286465 | -1.662909 |
| 108 | 1 | -2.170801 | -3.599405 | -1.117248 |
| 109 | 1 | -2.005492 | -2.316907 | -2.437732 |
| 110 | 1 | -0.549872 | -1.876342 | -3.006383 |
| 111 | 1 | -4.974330 | -1.726704 | -1.475551 |
| 112 | 6 | -0.008829 | 3.995039  | 1.787679  |
| 113 | 1 | -0.671606 | 3.821268  | 2.627818  |
| 114 | 1 | 1.008277  | 4.067455  | 2.142946  |
| 115 | 6 | -1.927268 | 4.218906  | -0.472865 |
| 116 | 1 | -1.389419 | 4.621802  | -1.321245 |
| 117 | 1 | -2.960643 | 4.074070  | -0.760218 |
| 118 | 6 | -1.843160 | 5.251409  | 0.658392  |
| 119 | 6 | -0.392729 | 5.333446  | 1.141900  |
| 120 | 1 | -2.194581 | 6.213440  | 0.293447  |
| 121 | 1 | -2.487017 | 4.958057  | 1.482923  |
| 122 | 1 | 0.270318  | 5.523490  | 0.304237  |
| 123 | 1 | -0.263905 | 6.135066  | 1.864311  |

---

HF = -4030.1261892 Hartree

Zero-point correction = 1.066148

Sum of electronic and thermal free energies = -4028.166682

[Ho(L<sup>3</sup>)(H<sub>2</sub>O)]<sup>3+</sup>·19H<sub>2</sub>O (tf)

(0 imaginary frequencies)

| Center<br>Number | Atomic<br>Number | Coordinates (Angstroms) |           |           |
|------------------|------------------|-------------------------|-----------|-----------|
|                  |                  | x                       | y         | z         |
| 1                | 67               | -0.340357               | -0.680900 | -0.552551 |
| 2                | 7                | -0.829206               | -1.170447 | 1.975369  |
| 3                | 7                | 0.990142                | 0.520948  | -2.478436 |
| 4                | 7                | -1.177639               | 1.994004  | -1.305767 |
| 5                | 7                | 0.033328                | 1.502943  | 1.432888  |
| 6                | 8                | -2.564976               | -0.326204 | -0.257057 |
| 7                | 8                | 1.802440                | -0.468392 | 0.171921  |
| 8                | 15               | -3.553566               | 0.671877  | -0.896191 |
| 9                | 15               | 2.568366                | 0.698570  | 0.799621  |
| 10               | 8                | -4.152939               | 1.568020  | 0.173972  |
| 11               | 8                | -4.595071               | -0.000688 | -1.777419 |
| 12               | 8                | 3.815162                | 0.310179  | 1.583495  |
| 13               | 8                | 2.861305                | 1.817771  | -0.203924 |
| 14               | 6                | -1.020397               | -1.922185 | 4.601676  |
| 15               | 6                | 1.806280                | 2.425065  | -3.615123 |
| 16               | 6                | 0.860118                | 1.791644  | -2.805481 |
| 17               | 6                | -0.256692               | 2.649098  | -2.264881 |
| 18               | 6                | -1.400570               | 2.859401  | -0.084547 |
| 19               | 6                | -2.475550               | 1.653609  | -1.975637 |
| 20               | 6                | 3.044059                | 0.398561  | -3.672402 |
| 21               | 6                | 2.068040                | -0.160218 | -2.893929 |
| 22               | 6                | 2.183453                | -1.596192 | -2.467752 |
| 23               | 6                | 2.903197                | 1.727849  | -4.046146 |
| 24               | 6                | -1.022004               | -2.880641 | 3.603873  |
| 25               | 6                | -0.901014               | -2.454954 | 2.302593  |
| 26               | 6                | -0.842204               | -3.434888 | 1.170859  |
| 27               | 6                | -0.941727               | -0.587116 | 4.258936  |
| 28               | 6                | -0.894231               | -0.236977 | 2.916899  |
| 29               | 6                | -0.966111               | 1.207281  | 2.483386  |
| 30               | 6                | -0.130959               | 2.855174  | 0.786351  |
| 31               | 6                | 1.409677                | 1.348382  | 2.013783  |
| 32               | 1                | -1.060375               | -2.209446 | 5.633690  |
| 33               | 1                | 1.694440                | 3.468678  | -3.822796 |
| 34               | 1                | 0.245726                | 3.480458  | -1.794438 |
| 35               | 1                | -0.818223               | 3.045062  | -3.107215 |
| 36               | 1                | -2.206902               | 2.407917  | 0.457965  |
| 37               | 1                | -2.274706               | 1.073153  | -2.861323 |
| 38               | 1                | -2.986714               | 2.555308  | -2.305317 |
| 39               | 1                | 3.902713                | -0.178852 | -3.932337 |
| 40               | 1                | 3.658664                | 2.208303  | -4.635189 |
| 41               | 1                | -1.097338               | -3.928505 | 3.798398  |
| 42               | 1                | -0.821040               | 0.168033  | 5.002796  |
| 43               | 1                | -1.961255               | 1.378387  | 2.097236  |
| 44               | 1                | -0.817380               | 1.826220  | 3.360853  |
| 45               | 1                | 0.731222                | 2.973013  | 0.156531  |

|    |   |           |           |           |
|----|---|-----------|-----------|-----------|
| 46 | 1 | 1.365375  | 0.654076  | 2.836504  |
| 47 | 1 | 1.771118  | 2.284990  | 2.416483  |
| 48 | 8 | 1.121084  | -2.104818 | -1.970983 |
| 49 | 8 | 3.257162  | -2.180204 | -2.667449 |
| 50 | 8 | -0.819316 | -2.901683 | 0.005001  |
| 51 | 8 | -0.786519 | -4.644612 | 1.418922  |
| 52 | 8 | 3.222104  | 4.063591  | 1.381036  |
| 53 | 1 | 3.007923  | 3.275617  | 0.846326  |
| 54 | 1 | 4.128735  | 3.866278  | 1.697397  |
| 55 | 8 | 5.480412  | 2.664953  | 1.715980  |
| 56 | 1 | 5.011137  | 1.832910  | 1.926079  |
| 57 | 1 | 5.719058  | 2.584194  | 0.774333  |
| 58 | 8 | 1.424616  | -4.535927 | -0.868804 |
| 59 | 1 | 1.348464  | -3.621722 | -1.235746 |
| 60 | 8 | 3.214763  | -5.107998 | -2.974559 |
| 61 | 1 | 2.588271  | -5.196747 | -2.236165 |
| 62 | 1 | 3.425591  | -4.160334 | -2.996556 |
| 63 | 1 | 0.527344  | -4.832664 | -0.664114 |
| 64 | 8 | 2.005632  | -4.741830 | 1.738457  |
| 65 | 1 | 1.075167  | -4.990384 | 1.857238  |
| 66 | 1 | 2.106323  | -4.591733 | 0.772837  |
| 67 | 8 | 5.731658  | -0.939682 | -2.228027 |
| 68 | 1 | 5.581951  | 0.007896  | -2.068045 |
| 69 | 1 | 4.884257  | -1.406286 | -2.350359 |
| 70 | 8 | 2.353615  | -3.127828 | 3.778557  |
| 71 | 1 | 2.408778  | -3.693066 | 2.963102  |
| 72 | 1 | 1.418699  | -2.956496 | 3.942746  |
| 73 | 8 | 6.143866  | -0.549401 | 0.486287  |
| 74 | 1 | 5.282630  | -0.484757 | 0.954952  |
| 75 | 1 | 6.048030  | -1.041310 | -0.350061 |
| 76 | 8 | 3.100392  | -0.580489 | 4.080827  |
| 77 | 1 | 2.939170  | -1.547439 | 3.985833  |
| 78 | 1 | 3.478667  | -0.240680 | 3.242331  |
| 79 | 8 | 5.550666  | 1.640601  | -0.906139 |
| 80 | 1 | 5.888430  | 0.912746  | -0.329277 |
| 81 | 1 | 4.579896  | 1.721254  | -0.775533 |
| 82 | 8 | 2.195119  | 4.371164  | -1.172427 |
| 83 | 1 | 2.444460  | 3.427913  | -1.141564 |
| 84 | 1 | 2.545951  | 4.736806  | -0.341962 |
| 85 | 8 | 1.434273  | 0.954025  | 5.421108  |
| 86 | 1 | 2.061534  | 0.312687  | 4.980561  |
| 87 | 1 | 1.711005  | 1.837225  | 5.140701  |
| 88 | 8 | -2.657293 | -3.485089 | -1.994090 |
| 89 | 8 | -4.942611 | -2.673325 | -1.117619 |
| 90 | 8 | -5.550410 | 0.249116  | 1.967339  |
| 91 | 8 | -7.015398 | 0.059961  | -0.501287 |
| 92 | 8 | -1.347494 | -1.464402 | -2.657776 |
| 93 | 8 | -3.373937 | -0.256846 | -4.321586 |
| 94 | 8 | -6.769062 | 2.418837  | 0.802798  |
| 95 | 8 | -4.025835 | -1.967473 | 1.295161  |

|     |   |           |           |           |
|-----|---|-----------|-----------|-----------|
| 96  | 1 | -4.739857 | -2.578687 | -0.157261 |
| 97  | 1 | -4.630445 | -1.376905 | 1.779769  |
| 98  | 1 | -3.376771 | -1.412523 | 0.808247  |
| 99  | 1 | -6.621995 | -0.257071 | 0.328939  |
| 100 | 1 | -6.274605 | 0.078916  | -1.146824 |
| 101 | 1 | -4.885915 | 0.712986  | 1.394409  |
| 102 | 1 | -6.254817 | 0.912089  | 2.064164  |
| 103 | 1 | -5.822756 | 2.472474  | 0.568933  |
| 104 | 1 | -7.106470 | 1.702582  | 0.224003  |
| 105 | 1 | -4.005638 | -0.191172 | -3.581016 |
| 106 | 1 | -2.606644 | -0.725783 | -3.957472 |
| 107 | 1 | -3.601995 | -3.285470 | -1.721910 |
| 108 | 1 | -2.110661 | -3.609430 | -1.199891 |
| 109 | 1 | -1.964860 | -2.270003 | -2.459640 |
| 110 | 1 | -0.522314 | -1.803617 | -3.032319 |
| 111 | 1 | -4.945657 | -1.766096 | -1.487666 |
| 112 | 6 | -0.081546 | 4.013928  | 1.819524  |
| 113 | 1 | -0.765436 | 3.827469  | 2.639880  |
| 114 | 1 | 0.925983  | 4.082229  | 2.201650  |
| 115 | 6 | -1.926120 | 4.264581  | -0.492964 |
| 116 | 1 | -1.344913 | 4.670586  | -1.310324 |
| 117 | 1 | -2.946668 | 4.139276  | -0.832057 |
| 118 | 6 | -1.882756 | 5.285100  | 0.651555  |
| 119 | 6 | -0.448802 | 5.361471  | 1.183032  |
| 120 | 1 | -2.221298 | 6.251381  | 0.285459  |
| 121 | 1 | -2.553898 | 4.982630  | 1.450598  |
| 122 | 1 | 0.238616  | 5.565637  | 0.368526  |
| 123 | 1 | -0.344315 | 6.152787  | 1.920605  |

---

HF = -4031.887274 Hartree

Zero-point correction = 1.066036

Sum of electronic and thermal free energies = -4030.928243

[Lu(L<sup>3</sup>)(H<sub>2</sub>O)]<sup>3+</sup>·19H<sub>2</sub>O (*tf*)

(0 imaginary frequencies)

| Center<br>Number | Atomic<br>Number | Coordinates (Angstroms) |           |           |
|------------------|------------------|-------------------------|-----------|-----------|
|                  |                  | x                       | y         | z         |
| 1                | 71               | -0.326888               | -0.712301 | -0.566866 |
| 2                | 7                | -0.835721               | -1.122865 | 1.942781  |
| 3                | 7                | 0.991527                | 0.494780  | -2.457166 |
| 4                | 7                | -1.185249               | 2.029001  | -1.334006 |
| 5                | 7                | -0.007882               | 1.576914  | 1.404563  |
| 6                | 8                | -2.497012               | -0.357880 | -0.300080 |
| 7                | 8                | 1.731848                | -0.441366 | 0.202425  |
| 8                | 15               | -3.511992               | 0.644577  | -0.887588 |
| 9                | 15               | 2.509790                | 0.727342  | 0.816084  |
| 10               | 8                | -4.091842               | 1.502549  | 0.225266  |
| 11               | 8                | -4.571086               | -0.020992 | -1.753952 |
| 12               | 8                | 3.748393                | 0.329932  | 1.608452  |
| 13               | 8                | 2.826398                | 1.822556  | -0.206128 |
| 14               | 6                | -1.049118               | -1.836226 | 4.579536  |
| 15               | 6                | 1.799931                | 2.369012  | -3.650201 |
| 16               | 6                | 0.855568                | 1.754757  | -2.822268 |
| 17               | 6                | -0.256134               | 2.636335  | -2.309854 |
| 18               | 6                | -1.406682               | 2.937477  | -0.147391 |
| 19               | 6                | -2.483218               | 1.661218  | -1.980117 |
| 20               | 6                | 3.053561                | 0.354348  | -3.641116 |
| 21               | 6                | 2.078015                | -0.188214 | -2.851429 |
| 22               | 6                | 2.201612                | -1.612284 | -2.392635 |
| 23               | 6                | 2.903958                | 1.670042  | -4.056639 |
| 24               | 6                | -1.016986               | -2.810423 | 3.597966  |
| 25               | 6                | -0.887732               | -2.402392 | 2.292049  |
| 26               | 6                | -0.810561               | -3.395234 | 1.175018  |
| 27               | 6                | -0.998751               | -0.506051 | 4.214233  |
| 28               | 6                | -0.938908               | -0.175528 | 2.867519  |
| 29               | 6                | -1.042096               | 1.259830  | 2.410995  |
| 30               | 6                | -0.161580               | 2.925239  | 0.756413  |
| 31               | 6                | 1.356043                | 1.421042  | 2.009893  |
| 32               | 1                | -1.096475               | -2.106580 | 5.615727  |
| 33               | 1                | 1.678756                | 3.404321  | -3.891608 |
| 34               | 1                | 0.260239                | 3.470609  | -1.860836 |
| 35               | 1                | -0.807598               | 3.018936  | -3.165570 |
| 36               | 1                | -2.244627               | 2.531371  | 0.384990  |
| 37               | 1                | -2.286760               | 1.086625  | -2.870731 |
| 38               | 1                | -3.026360               | 2.549022  | -2.297837 |
| 39               | 1                | 3.917771                | -0.224224 | -3.879103 |
| 40               | 1                | 3.657048                | 2.138497  | -4.658241 |
| 41               | 1                | -1.076806               | -3.856309 | 3.808447  |
| 42               | 1                | -0.910986               | 0.262841  | 4.948270  |
| 43               | 1                | -2.023281               | 1.389134  | 1.975455  |
| 44               | 1                | -0.959797               | 1.893603  | 3.287389  |
| 45               | 1                | 0.714896                | 3.051376  | 0.147484  |



|    |   |           |           |           |
|----|---|-----------|-----------|-----------|
| 46 | 1 | 1.294380  | 0.754475  | 2.854664  |
| 47 | 1 | 1.730464  | 2.364123  | 2.384344  |
| 48 | 8 | 1.136822  | -2.117112 | -1.898062 |
| 49 | 8 | 3.280443  | -2.194129 | -2.568646 |
| 50 | 8 | -0.784710 | -2.873661 | 0.003363  |
| 51 | 8 | -0.749098 | -4.602484 | 1.432752  |
| 52 | 8 | 3.173001  | 4.102542  | 1.336607  |
| 53 | 1 | 2.963603  | 3.303905  | 0.816010  |
| 54 | 1 | 4.072363  | 3.906782  | 1.673536  |
| 55 | 8 | 5.417581  | 2.696883  | 1.738386  |
| 56 | 1 | 4.947070  | 1.867949  | 1.956047  |
| 57 | 1 | 5.667652  | 2.601653  | 0.800908  |
| 58 | 8 | 1.452083  | -4.549460 | -0.798511 |
| 59 | 1 | 1.365779  | -3.636380 | -1.165871 |
| 60 | 8 | 3.251372  | -5.120973 | -2.888720 |
| 61 | 1 | 2.619038  | -5.209282 | -2.154984 |
| 62 | 1 | 3.463834  | -4.173674 | -2.906534 |
| 63 | 1 | 0.559771  | -4.853301 | -0.582805 |
| 64 | 8 | 2.030111  | -4.732088 | 1.813485  |
| 65 | 1 | 1.094264  | -4.964281 | 1.922953  |
| 66 | 1 | 2.140962  | -4.589427 | 0.848247  |
| 67 | 8 | 5.749111  | -0.941896 | -2.164679 |
| 68 | 1 | 5.595484  | 0.006114  | -2.009884 |
| 69 | 1 | 4.902841  | -1.412539 | -2.279313 |
| 70 | 8 | 2.345862  | -3.103360 | 3.851432  |
| 71 | 1 | 2.416961  | -3.673368 | 3.041342  |
| 72 | 1 | 1.409374  | -2.911326 | 3.981345  |
| 73 | 8 | 6.097875  | -0.532635 | 0.562304  |
| 74 | 1 | 5.225851  | -0.466167 | 1.010845  |
| 75 | 1 | 6.023703  | -1.032847 | -0.270924 |
| 76 | 8 | 3.060050  | -0.536571 | 4.111307  |
| 77 | 1 | 2.918294  | -1.507319 | 4.036103  |
| 78 | 1 | 3.421448  | -0.203683 | 3.262183  |
| 79 | 8 | 5.523823  | 1.639155  | -0.863674 |
| 80 | 1 | 5.853423  | 0.919088  | -0.272498 |
| 81 | 1 | 4.550401  | 1.718026  | -0.750147 |
| 82 | 8 | 2.197194  | 4.363825  | -1.237733 |
| 83 | 1 | 2.439493  | 3.419731  | -1.187304 |
| 84 | 1 | 2.533806  | 4.740134  | -0.406080 |
| 85 | 8 | 1.379118  | 0.996057  | 5.424771  |
| 86 | 1 | 2.011430  | 0.353334  | 4.992800  |
| 87 | 1 | 1.658373  | 1.878167  | 5.143204  |
| 88 | 8 | -2.595693 | -3.493011 | -2.007080 |
| 89 | 8 | -4.897175 | -2.707881 | -1.151283 |
| 90 | 8 | -5.482343 | 0.157474  | 1.998992  |
| 91 | 8 | -6.973840 | 0.021387  | -0.450829 |
| 92 | 8 | -1.299946 | -1.459885 | -2.645664 |
| 93 | 8 | -3.363152 | -0.282998 | -4.305279 |
| 94 | 8 | -6.704964 | 2.356906  | 0.892066  |
| 95 | 8 | -3.954695 | -2.024236 | 1.253623  |

|     |   |           |           |           |
|-----|---|-----------|-----------|-----------|
| 96  | 1 | -4.689335 | -2.623808 | -0.191059 |
| 97  | 1 | -4.552276 | -1.447155 | 1.762654  |
| 98  | 1 | -3.311233 | -1.460295 | 0.771428  |
| 99  | 1 | -6.572051 | -0.310173 | 0.369761  |
| 100 | 1 | -6.239639 | 0.049181  | -1.103815 |
| 101 | 1 | -4.824506 | 0.632708  | 1.426759  |
| 102 | 1 | -6.182595 | 0.819653  | 2.124573  |
| 103 | 1 | -5.760935 | 2.414331  | 0.651334  |
| 104 | 1 | -7.048657 | 1.650872  | 0.304395  |
| 105 | 1 | -3.991737 | -0.218467 | -3.562017 |
| 106 | 1 | -2.586212 | -0.735140 | -3.941052 |
| 107 | 1 | -3.546574 | -3.305114 | -1.747926 |
| 108 | 1 | -2.058370 | -3.614315 | -1.206134 |
| 109 | 1 | -1.913261 | -2.272427 | -2.454109 |
| 110 | 1 | -0.485616 | -1.791712 | -3.046785 |
| 111 | 1 | -4.908316 | -1.794662 | -1.506595 |
| 112 | 6 | -0.150763 | 4.079866  | 1.796409  |
| 113 | 1 | -0.873424 | 3.892478  | 2.582628  |
| 114 | 1 | 0.838077  | 4.136753  | 2.226205  |
| 115 | 6 | -1.855264 | 4.354590  | -0.606003 |
| 116 | 1 | -1.191562 | 4.742564  | -1.366836 |
| 117 | 1 | -2.844588 | 4.266567  | -1.038032 |
| 118 | 6 | -1.877353 | 5.374335  | 0.539945  |
| 119 | 6 | -0.476485 | 5.436205  | 1.155869  |
| 120 | 1 | -2.182561 | 6.344718  | 0.155599  |
| 121 | 1 | -2.598831 | 5.076779  | 1.295802  |
| 122 | 1 | 0.255665  | 5.647086  | 0.383010  |
| 123 | 1 | -0.410778 | 6.219370  | 1.906610- |

---

HF = -4034.1915214 Hartree

Zero-point correction = 1.065899

Sum of electronic and thermal free energies = -4033.232874

$[\text{Lu}(\text{L}^3)]^3 \cdot 20\text{H}_2\text{O}$ 

(0 imaginary frequencies)

| Center<br>Number | Atomic<br>Number | Coordinates (Angstroms) |           |           |
|------------------|------------------|-------------------------|-----------|-----------|
|                  |                  | x                       | y         | z         |
| 1                | 71               | 0.210899                | -0.628604 | 0.184546  |
| 2                | 7                | 0.391140                | -1.053904 | -2.361637 |
| 3                | 7                | -0.263774               | 0.613333  | 2.494644  |
| 4                | 7                | 1.078637                | 2.344393  | 0.678916  |
| 5                | 7                | -0.548752               | 1.526344  | -1.697701 |
| 6                | 8                | 2.302823                | -0.250508 | -0.043950 |
| 7                | 8                | -1.958672               | -0.530080 | -0.012758 |
| 8                | 15               | 3.312400                | 0.924282  | -0.031396 |
| 9                | 15               | -2.861956               | 0.599928  | -0.545151 |
| 10               | 8                | 3.445870                | 1.494247  | -1.435383 |
| 11               | 8                | 4.628137                | 0.527015  | 0.611485  |
| 12               | 8                | -4.213262               | 0.101270  | -1.026004 |
| 13               | 8                | -2.968522               | 1.744912  | 0.453226  |
| 14               | 6                | 0.488283                | -1.801922 | -4.998345 |
| 15               | 6                | -0.621539               | 2.386140  | 4.023359  |
| 16               | 6                | -0.182833               | 1.902009  | 2.788758  |
| 17               | 6                | 0.332108                | 2.913358  | 1.805664  |
| 18               | 6                | 0.939546                | 3.186191  | -0.551569 |
| 19               | 6                | 2.498240                | 2.097300  | 1.072013  |
| 20               | 6                | -1.220350               | 0.177972  | 4.636488  |
| 21               | 6                | -0.767978               | -0.224071 | 3.407915  |
| 22               | 6                | -0.820270               | -1.675638 | 3.055234  |
| 23               | 6                | -1.149296               | 1.525638  | 4.950667  |
| 24               | 6                | 0.545237                | -2.758051 | -4.004088 |
| 25               | 6                | 0.497850                | -2.334841 | -2.699423 |
| 26               | 6                | 0.563276                | -3.302553 | -1.559877 |
| 27               | 6                | 0.396297                | -0.470041 | -4.646562 |
| 28               | 6                | 0.355645                | -0.122689 | -3.306094 |
| 29               | 6                | 0.333976                | 1.315734  | -2.869794 |
| 30               | 6                | -0.455931               | 2.936049  | -1.162658 |
| 31               | 6                | -1.971226               | 1.160606  | -2.014923 |
| 32               | 1                | 0.509478                | -2.087046 | -6.031442 |
| 33               | 1                | -0.550271               | 3.436103  | 4.218913  |
| 34               | 1                | -0.526402               | 3.465402  | 1.455292  |
| 35               | 1                | 0.952444                | 3.615166  | 2.360108  |
| 36               | 1                | 2.497234                | 1.641418  | 2.052100  |
| 37               | 1                | 3.057664                | 3.024424  | 1.165886  |
| 38               | 1                | -1.611396               | -0.558329 | 5.302636  |
| 39               | 1                | -1.500510               | 1.887423  | 5.896566  |
| 40               | 1                | 0.619036                | -3.804894 | -4.199228 |
| 41               | 1                | 0.348805                | 0.295689  | -5.392771 |
| 42               | 1                | 1.348216                | 1.571303  | -2.596438 |
| 43               | 1                | 0.030113                | 1.922922  | -3.715377 |
| 44               | 1                | -1.982816               | 0.323241  | -2.698610 |
| 45               | 1                | -2.493972               | 1.974489  | -2.502524 |

|    |   |           |           |           |
|----|---|-----------|-----------|-----------|
| 46 | 8 | -0.311719 | -1.981829 | 1.932737  |
| 47 | 8 | -1.348072 | -2.454762 | 3.867456  |
| 48 | 8 | 0.558592  | -2.738925 | -0.412110 |
| 49 | 8 | 0.593644  | -4.515037 | -1.786863 |
| 50 | 8 | -4.120258 | 3.835161  | -0.966756 |
| 51 | 1 | -3.591279 | 3.114774  | -0.582113 |
| 52 | 1 | -5.034567 | 3.497479  | -0.860481 |
| 53 | 8 | -6.103645 | 2.095147  | -0.335718 |
| 54 | 1 | -5.617451 | 1.364614  | -0.770624 |
| 55 | 1 | -5.971025 | 1.953383  | 0.618416  |
| 56 | 8 | 0.219414  | -4.599321 | 1.534321  |
| 57 | 1 | -0.073533 | -3.658366 | 1.600264  |
| 58 | 8 | 1.026672  | -4.137350 | 4.059032  |
| 59 | 1 | 0.858550  | -4.530240 | 3.175188  |
| 60 | 1 | 0.199842  | -3.687446 | 4.299878  |
| 61 | 1 | 0.858625  | -4.585548 | 0.805984  |
| 62 | 8 | -1.604709 | -5.408268 | -0.361169 |
| 63 | 1 | -0.888705 | -5.364987 | -1.022507 |
| 64 | 1 | -1.160592 | -5.237564 | 0.493405  |
| 65 | 8 | -4.134901 | -1.666696 | 3.019957  |
| 66 | 1 | -4.193435 | -0.698020 | 3.053262  |
| 67 | 1 | -3.278416 | -1.988652 | 3.334982  |
| 68 | 8 | -2.438132 | -3.011727 | -1.282370 |
| 69 | 1 | -2.283447 | -3.902626 | -0.895832 |
| 70 | 1 | -2.343171 | -2.302954 | -0.626920 |
| 71 | 8 | -5.673108 | -1.270522 | 0.835828  |
| 72 | 1 | -5.156002 | -0.991881 | 0.052046  |
| 73 | 1 | -5.099618 | -1.744435 | 1.468652  |
| 74 | 8 | -3.517988 | -1.529503 | -3.167884 |
| 75 | 1 | -3.091663 | -2.226737 | -2.612265 |
| 76 | 1 | -3.979694 | -0.932943 | -2.547559 |
| 77 | 8 | -5.083496 | 0.991501  | 2.134306  |
| 78 | 1 | -5.446420 | 0.202792  | 1.663066  |
| 79 | 1 | -4.282266 | 1.298462  | 1.663826  |
| 80 | 8 | -2.514449 | 4.373018  | 1.213358  |
| 81 | 1 | -2.634700 | 3.406632  | 1.265766  |
| 82 | 1 | -3.112269 | 4.638604  | 0.492201  |
| 83 | 8 | -4.820243 | -2.403005 | -5.312998 |
| 84 | 1 | -4.262112 | -1.984748 | -4.607039 |
| 85 | 1 | -5.344000 | -3.071837 | -4.848496 |
| 86 | 8 | 2.675764  | -2.058850 | 3.290442  |
| 87 | 8 | 4.433848  | -2.196586 | 1.314068  |
| 88 | 8 | 4.479040  | -0.405665 | -3.042639 |
| 89 | 8 | 6.610571  | 0.079354  | -1.141487 |
| 90 | 8 | 2.684959  | 0.382218  | 3.988517  |
| 91 | 8 | 4.882839  | 1.876607  | 3.148910  |
| 92 | 8 | 5.821407  | 1.955030  | -2.915957 |
| 93 | 8 | 3.531350  | -2.361802 | -1.292615 |
| 94 | 1 | 4.197393  | -2.513608 | 0.420134  |
| 95 | 1 | 3.991710  | -1.939637 | -2.039181 |

|     |   |           |           |           |
|-----|---|-----------|-----------|-----------|
| 96  | 1 | 2.963520  | -1.683669 | -0.879142 |
| 97  | 1 | 6.047776  | -0.481692 | -1.698880 |
| 98  | 1 | 6.044813  | 0.301372  | -0.363221 |
| 99  | 1 | 3.904108  | 0.184332  | -2.503001 |
| 100 | 1 | 5.101324  | 0.224357  | -3.449654 |
| 101 | 1 | 4.971526  | 2.112491  | -2.460008 |
| 102 | 1 | 6.349998  | 1.440606  | -2.267383 |
| 103 | 1 | 5.000470  | 1.435151  | 2.290022  |
| 104 | 1 | 4.162651  | 1.394501  | 3.597436  |
| 105 | 1 | 3.296953  | -2.240762 | 2.539256  |
| 106 | 1 | 2.158508  | -2.834389 | 3.589144  |
| 107 | 1 | 2.690281  | -0.596546 | 3.725999  |
| 108 | 1 | 1.939408  | 0.552367  | 4.574801  |
| 109 | 1 | 4.608347  | -1.237715 | 1.220033  |
| 110 | 6 | 1.224848  | 4.683577  | -0.247773 |
| 111 | 6 | -0.869050 | 3.998400  | -2.220612 |
| 112 | 6 | -0.620730 | 5.429809  | -1.722833 |
| 113 | 6 | 0.871606  | 5.606078  | -1.421123 |
| 114 | 1 | 2.272352  | 4.782387  | 0.013587  |
| 115 | 1 | 0.639141  | 5.015962  | 0.598117  |
| 116 | 1 | 1.459942  | 5.351878  | -2.298961 |
| 117 | 1 | 1.099061  | 6.635877  | -1.156542 |
| 118 | 1 | -1.197264 | 5.590270  | -0.818422 |
| 119 | 1 | -0.959088 | 6.139026  | -2.473496 |
| 120 | 1 | -0.319359 | 3.860963  | -3.144302 |
| 121 | 1 | -1.925749 | 3.891194  | -2.421739 |
| 122 | 1 | -1.187673 | 2.989043  | -0.379370 |
| 123 | 1 | 1.712068  | 2.853085  | -1.219914 |

---

HF = -4034.1884489 Hartree

Zero-point correction = 1.064290

Sum of electronic and thermal free energies = -4033.237802
